# Supplementary material for: Microbial Diversity in Moonmilk of Baeg-nyong Cave, Korean CZO
Source: Front Microbiol. 2020 Apr 23;11:613. doi: 10.3389/fmicb.2020.00613 (PMC7190796; doi:10.3389/fmicb.2020.00613)
Supplement: TABLE S2 — Total number of fungal OTUs from the whole sample. [file Table_2.xlsx]

## Sheet: Sheet1
OTUNumber	fun_soil_1_1	fun_soil_1_2	fun_soil_2_1	fun_soil_2_2	fun_dry_1	fun_dry_2	fun_dry_3	fun_wet_1	fun_wet_2	fun_wet_3	repSeqName	repSeq	OTUConTaxonomy
Otu0001	5001	4425	3888	3396	7256	6496	7177	5925	7815	8276	M03053_189_000000000-D2L8J_1_1101_16282_1473	ATACGTAATGTGAATTGCAGAATTCAGTGAATCATCGAATCTTTGAACGCATATTGCGCTCTCTGGTATTCCGGAGAGCATGCTTGTTTGAGTATCAGTAAACACCTCAACTCCCTTTCTTCTTGAAATGGAGCTGGACTTGAGTGATCCCAACGCTTTATTCATAAAGCGGCGGGTTACTTGAAATGCAGGTGCAGCTGGACTTTTCTCTGAGCTATAAGCATATCTATTTAGTCTGCCTCAAAACAGATTATTACCTTTGCTGCAGCTAACATAAAGGAGATTAGTTCTTGTGCTGACTGATGCAGGATTCACAAAGACCGCTTCGGCTGTCTTTGTAAACTCGATCTCAAATCAAGTAAGACTACCCGCTGAACTTA	k__Fungi(100);p__Zygomycota(100);c__Mortierellomycotina_cls_Incertae_sedis(100);o__Mortierellales(100);f__Mortierellaceae(100);g__Mortierella(100);s__Mortierella_antarctica(100);
Otu0024	0	0	4	0	107	4	2	2	6	1	M03053_189_000000000-D2L8J_1_1101_22632_6261	ATACGTAATGTGAATTGCAGAATTCAGTGAATCATCGAATCTTTGAACGCATATTGCGCTCTTTGGTATTCCGAAGAGCATGCTTGTTTGAGTATCAGTAAACACCTCAACCTCCTCTTGATTTTTCAAAAGGAGGGTGGACTTGAGCTATCCCAACAACCTTTATCGGTCGGCGGGCGGCTTGAAATGCAGGTGCAGCTGGACTTTTATCTGAGCTAAAAGCATATCTATTTAGTCCTCGTCAAACAGGATTATTACTTTTGCTGCAGCTAACATAAAGGATAATTGTCCTCTTTGCTGACTGATGCAGGATTTTACGACACTTTATGTGTTGTTCAACTCGATCTCAAATCAAGTAAGACTACCCGCTGAACTTA	k__Fungi(100);p__Zygomycota(100);c__Mortierellomycotina_cls_Incertae_sedis(100);o__Mortierellales(100);f__Mortierellaceae(100);g__Mortierella(100);s__Mortierella_clonocystis(99);
Otu0046	0	0	0	0	52	2	0	0	3	0	M03053_189_000000000-D2L8J_1_1101_15830_5754	ATACGTAATGTGAATTGCAGAACACAGTGAATCATCGAATCTTTGAACGCATATTGCGCTCTCTGGTATTCCGGAGAGCATGCTTGTTTGAGTATCAGTAAAACACCTCAACCTTTATTTCTCTTTTTTTTTGAGAAAATAGAGGGTGGACTTGAGCTTTCCCAACACACTCTGTTTCATCAGTTTGCGGCGGGCGGCTTGAAATGCAGGTGCAGCTGGACCCTTATCTGAGCTAAAAGCATATCTATTTAGTCCTCGTCAAACAGGATTATTACTTTTGCTGCAGCTAACATAAAGGATATTTGTCCTCTTTGCTGACTGATGCAGGAATGTACAGCAGATGTTCTGTTTTCAGGATATTTGTTGTCAAACTCGATCTCAAATCAAGTAAGACTACCC…	k__Fungi(100);p__Zygomycota(100);c__Mortierellomycotina_cls_Incertae_sedis(100);o__Mortierellales(100);f__Mortierellaceae(100);g__Mortierella(100);s__Mortierella_humilis(92);
Otu0057	0	0	0	0	32	0	0	0	2	0	M03053_189_000000000-D2L8J_1_1101_21028_6121	ATACGTAATGCGAATTGCAGAATTCAGTGAATCATCAAATCTTTGAACGCAAATTGCACTCTCGGGATAGGCCTGGGAGTACGCCTCTTTGACTATCGATTCCATCACTCAACAACTTCTTGTTGTTGGATACTGGACCAACATTGCGATCAGCAATGCGGTCTTAAACACATGGAGTTTAAGCTGTCTTGAGAGCTTCGCCTCGGCGAATAGTCCAATCGGACTTGCAAACCAAGTTGCCTGTAGTGACGAAGGTAATTTCGCAATGCGAATCCTCCAACGTGACTACGTGGTGCCTTGGGACTTGTCGGTTGAATGAACGCTCAAGTAGCAATAAGAAACGATGTTCGAGGCTTCAAAACCTCAACAACTTTGAATTAGATGTCAAATGAAGCGAGA…	k__Fungi(100);unclassified(100);unclassified(100);unclassified(100);unclassified(100);unclassified(100);unclassified(100);
Otu0021	0	0	111	0	14	2	0	0	5	3	M03053_189_000000000-D2L8J_1_1101_15726_7411	ATACGTAATGTGAATTGCAGAATTCAGTGAATCATCGAATCTTTGAACGCATATTGCGCTCTCTGGTATTCCGGAGAGCATGCTTGTTTGAGTATCAGTAAACACCTCAACTCCTTTTTCTTTTTTGAAATTGGAGCTGGACTTGAGTGATCCCAACGCTTTCTTCCAAGAAAGTGGCGGGTTGCTTGAAATGCAGGTGCAGCTGAACTTTTCTCTGAGCTATAAGCATATCTATTTAGTCTGCCTAAAAAACAGATTATTACCTTTGCTGCAGCTAACATAAAGGAGACTAGTTCTTGTGCTGACTGATGCAGGATTCACAGAGACAGCTTCGGCTGACTTTGTAAACTCGATCTCAAATCAAGTAAGACTACCCGCTGAACTTA	k__Fungi(100);p__Zygomycota(100);c__Mortierellomycotina_cls_Incertae_sedis(100);o__Mortierellales(100);f__Mortierellaceae(100);g__Mortierella(100);s__Mortierella_alpina(100);
Otu0102	0	0	0	0	11	0	2	0	1	0	M03053_189_000000000-D2L8J_1_1101_21624_6085	ATACGTAATGTGAATTGCAGAATTCAGTGAATCATCGAATCTTTGAACGCATATTGCGCTCTCTGGTATTCCGGAGAGCATGCTTGTTTGAGTATCAGTAAACACCTCAACTCCTCTCTTCTCTTTTGAAAATGGGAGTTGGACTTGAGTAATCCCAACGCTTTTCTCACCGAACAGTGGCGGGTTACTTGAAATGCAGGTGCAGCTGGACTATTTCTCTGAGCTAAAAGCATATCTATTTAGTCTGCCTCAAAACAGATTATTACCTTTGCTGCAGCTAACATAAAGGAGATTAGTTCTTGTGCTGACTGATGCAGGATTCACAAAGACCGCTTCGGCTGTCTTTGTAAACTCGATCTCAAATCAAGTAAGACTACCCGCTGAACTTA	k__Fungi(100);p__Zygomycota(100);c__Mortierellomycotina_cls_Incertae_sedis(100);o__Mortierellales(100);f__Mortierellaceae(100);g__Mortierella(100);s__Mortierella_alpina(100);
Otu0035	37	24	3	0	9	4	3	0	0	0	M03053_189_000000000-D2L8J_1_1101_17432_5743	ATAAGTAATGTGAATTGCAGAATTCAGTGAATCATCGAATCTTTGAACGCACATTGCGCCCCCTGGTATTCCGGGGGGCATGCCTGTCCGAGCGTCATTACAACCCTCAAGCTCAGCTTGGTATTGGGCCCCGCCGACCCGGCGGGCCCTAAAGTCAGTGGCGGTGCCGTCCGGCTCCGAGCGTAGTAATTCTTCTCGCTCTGGAGGTCCGGTCGTGTGCTCGCCAGCAACCCCCAATTTTTTTCAGGTTGACCTCGGATCAGGTAGGGATACCCGCTGAACTTA	k__Fungi(100);p__Ascomycota(100);c__Leotiomycetes(100);o__Leotiomycetes_ord_Incertae_sedis(100);unclassified(100);unclassified(100);unclassified(100);
Otu0012	81	84	37	4	7	3	2	4	4	8	M03053_189_000000000-D2L8J_1_1101_25633_20610	ATACGTAATGTGAATTGCAGAATTCAGTGAATCATCGAATCTTTGAACGCATATTGCGCTCTCTGGTATTCCGGAGAGCATGCTTGTTTGAGTATCAGTAAACACCTCAACTTCCATATCTTTTTTGAAATGGGAGTTGGACTTGAGTGATCCCAACGCTTTTCCTCACCGAAAAGTGGCGGGTTACTTGAAATGCAGGTGCAGCTGGACTTTTCTCTGAGCTATAAGCATATCTATTTAGTCTGCCTAAAAAACAGATTATTACCTTTGCTGCAGCTAACATAAAGGAGATTAGTTCTTGTGCTGACTGATGCAGGATTCACAAAGACAGGCTTCGGCCGACTTTGTAAACTCGATCTCAAATCAAGTAAGACTACCCGCTGAACTTA	k__Fungi(100);p__Zygomycota(100);c__Mortierellomycotina_cls_Incertae_sedis(100);o__Mortierellales(100);f__Mortierellaceae(100);g__Mortierella(100);s__Mortierella_alpina(57);
Otu0053	20	14	0	0	4	0	2	0	0	0	M03053_189_000000000-D2L8J_1_1101_22823_15769	ATAAGTAATGTGAATTGCAGAATTCAGTGAATCATCGAATCTTTGAACGCACATTGCGCCCGCCAGTATTCTGGCGGGCATGCCTGTTCGAGCGTCATTTCAACCATCAAGCCCCCGGCTTGTGTTGGGGACCTGCGGCTGCCGCAGGCCCTGAAAACCAGTGGCGGGCTCGCTAGTCACTCCGAGCGTAGTAATACATCTCGCTCAGGGCGTGCTGCGGGTTCCGGCCGTTAAAAAGCCTTATTTACCCAAGGTTGACCTCGGATCAGGTAGGAAGACCCGCTGAACTTA	k__Fungi(100);p__Ascomycota(100);c__Sordariomycetes(100);o__Sordariales(100);f__Chaetomiaceae(100);unclassified(100);unclassified(100);
Otu0048	0	4	44	0	3	0	0	0	1	0	M03053_189_000000000-D2L8J_1_1101_21172_10017	ATAAGTAATGTGAATTGCAGAGTTCAGTGAATCATCGAATCTTTGAACGCACATTGCGCCCGTTAGTATTCTGACGGGCATGCCTGTCCGAGCGTCATTTCAACCCTTAAGCACTGCTTAGCGTTGGCGGATTACAGCACCTCCGTGCGCTGTAACCGCCCAAATCCAGTGGCGGTCCCGCTGTGGTTCCCTTGCGTAGTAACTCACCTCGCACTGGACCAGGCGGCGGCTCGCCGTAAAACCCCCACTATAAAAGGTTGACCTCGGATCAGGTAGGAATACCCGCTGAACTTA	k__Fungi(100);p__Ascomycota(100);c__Sordariomycetes(100);unclassified(100);unclassified(100);unclassified(100);unclassified(100);
Otu0070	0	0	4	2	3	4	11	3	0	0	M03053_189_000000000-D2L8J_1_1101_24748_4782	ATACGTAATGTGCATTGCAGCCTTCCGTGCCTCCTCGCCTCTTTGCCCTCATATTGCGCTCTCTGGTATTCCGGAGAGCATGCTTGTTTGAGTATCAGTAAACACCTCAACTCCCTTTCTTCTTGAAATGGAGCTGGACTTGAGTGATCCCAACGCTTTATTCATAAAGCGGCGGGTTACTTGAAATGCAGGTGCAGCTGGACTTTTCTCTGAGCTATAAGCATATCTATTGAGGCGGCCGCAAAACAGATGAGGACCTGGGCGGCAGCTAACATAAAGGAGATGAGGGAGTGGGAGGAAGGAGGAAGGAGGAAAAAAGAAAGAGGAGGCGGGAGGGGGAAAAGAGAGAGAAAAGAAAGGAAGAAGAAAAGAGGAAAGGA	k__Fungi(100);p__Zygomycota(100);c__Mortierellomycotina_cls_Incertae_sedis(100);o__Mortierellales(100);f__Mortierellaceae(100);g__Mortierella(100);s__Mortierella_antarctica(100);
Otu0141	0	0	0	0	3	4	0	0	0	0	M03053_189_000000000-D2L8J_1_1102_15101_8801	ATAAGTAGTGTGAATTGCAGAATTCCGTGAATCATCGAATCTTTGAACGCACATTGCGCCCCCTGGTATTCCGGGGGGCATGCCTGTCCGAGCGTCATTGCAACCCTCAAGCGCGGCTTGTGTGATGGGCGCTGTCCTCCGCGGACACGCCTCAAAGGCAGTGGCGGCGTCCCGACTGGGTGCCTGAGCGAATGGGACTAAAACTGTCCGCTCAAGAGGCCCCGATCGGCGCCGGTCGAACTATATAATTTTTTTCGGTTGACCTCGGATCAGGTAGGAATACCCGCTGAACTTA	k__Fungi(100);p__Ascomycota(100);c__Eurotiomycetes(100);o__Onygenales(100);unclassified(100);unclassified(100);unclassified(100);
Otu0205	0	0	0	0	3	0	0	1	0	0	M03053_189_000000000-D2L8J_1_1101_25686_10952	ATAAGTAATGTGAATTGCAGAATTCCGTGAATCATCGAATCTTTGAACGCACATTGCGCCCTCCGGTATTCCGGGGGGCATGCCTGTCCGAGCGTCATTGCACACCTCAAGCCCGGCTTGCGTGATGGGTGACGTCCCCCCGGGGACGCGCCCGAAAGGCAATGGCGGCGTCGCGGTTATCCGAACGGCCAAAGTGTATGGGGCTATGTCACGCACTCTGAGGCCCGGACCGGCGCCAGCCCGAATCTCAACTTCTTAGGTTGACCTCGGATCAGGTAGGGATACCCGCTGAACTTA	k__Fungi(100);p__Ascomycota(100);c__Eurotiomycetes(100);o__Onygenales(100);f__Gymnoascaceae(100);g__Gymnoascus(100);s__Gymnoascus_sp(100);
Otu0014	0	0	180	2	2	0	0	0	5	0	M03053_189_000000000-D2L8J_1_1101_16402_3335	ATAAGTAGTGTGAATTGCAGAATTCAGTGAATCATCGAATCTTTGAACGCACATTGCGCCCCTCGGTATTCCGTGGGGCATGCCTGTTCGAGCGTCATTTAACCCCTCAAGCCTAGCTTGGTATTGGGTGCTTGTCCCGCCTCTCGCGCGGCGACTCACCTCAAAGTCATTGGCAGCCCGCATCTCGCCGGCCGTGAGCGCAGCACAGACGCGCTCTTGGCAACGACGGATCGGCTCTCCAAAAGCTTATTTCAACCACTGACCTCGGATCAGGTAGGGATACCCGCTGAACTTA	k__Fungi(100);p__Ascomycota(100);c__Dothideomycetes(100);o__Pleosporales(100);f__Didymosphaeriaceae(93);g__Roussoella(93);unclassified(93);
Otu0020	8	48	0	6	2	0	0	43	2	27	M03053_189_000000000-D2L8J_1_1101_17455_21004	ATACGTAATGTGAATTGCAGAATTCCGTGAATCATCGAATCTTTGAACGCACATTGCGCCCCTTGGTATTCCAGGGGGCATGCCTGTTTGAGCGTCATTTCCTTCTCAAACATTCTGTTTGGTAGTGAGTGATACTCTTTGGAGTTAACTTGAAATTGCTGGCCTTTTCATTGGATGTTTTTTTTCCAAAGAGAGGTTTCTCTGCGTGCTTGAGGTATAATGCAAGTACGGTCGTTTTAGGTTTTACCAACTGCGGCTAATCTTTTTTTATACTGAGCGTATTGGAACGTTATCGATAAGAAGAGAGCGTCTAGGCGAACAATGTTCTTAAAGTTTGACCTCAAATCAGGTAGGAGTACCCGCTGAACTTA	k__Fungi(100);p__Ascomycota(100);c__Saccharomycetes(100);o__Saccharomycetales(100);f__Saccharomycetaceae(100);g__Saccharomyces(100);unclassified(100);
Otu0025	26	21	65	0	2	0	0	0	0	0	M03053_189_000000000-D2L8J_1_1101_18292_7576	ATAAGTAATGTGAATTGCAGAATTCAGTGAATCATCGAATCTTTGAACGCACATTGCGCCCGCTAGTATTCTGGCGGGCATGCCTGTCCGAGCGTCATTTCAACCCTCAAGCCCCCGGGCTTGGTGTTGGGGATCGGCGAGCCTCCGCGCCCGCCGTCCCCTAAATCTAGTGGCGGTCTCGCTGTAGCTTCCTCTGCGTAGTAGCACACCTCGCACTGGGAAACAGCGCGGCCACGCCGTTAAACCCCCAACTTCTGAACGTTTGACCTCGGATCAGGTAGGAATACCCGCTGAACTTA	k__Fungi(100);p__Ascomycota(100);c__Sordariomycetes(100);o__Hypocreales(100);f__Hypocreales_fam_Incertae_sedis(100);g__Ilyonectria(100);s__Ilyonectria_macrodidyma(100);
Otu0032	2	17	63	0	2	0	1	0	2	0	M03053_189_000000000-D2L8J_1_1101_28403_15050	ATAAGTAGTGTGAATTGCAGAATTCAGTGAATCATCGAATCTTTGAACGCACATTGCGCCCCTTGGTATTCCATGGGGCATGCCTGTTCGAGCGTCATTTGTACCCTCCAGCCCTGCTGGGTATTGGGCGTTTTGTTCCGCTACGCGCGTGAACTCGCCTCAAATGCATTGGCAGCCCGCCGTCCCGTGTGGGAGCGCAGCACATTTTGCGCTCTCTGCTGCTGACGGTGGCATCCACAAGTCTACCATTTTACGCTTGACCTCGGATCAGGTAGGGATACCCGCTGAACTTA	k__Fungi(100);p__Ascomycota(100);c__Dothideomycetes(100);o__Pleosporales(100);f__unclassified_Pleosporales(100);g__unclassified_Pleosporales(100);s__Pleosporales_sp(100);
Otu0044	0	2	3	4	2	7	11	16	6	7	M03053_189_000000000-D2L8J_1_1101_23812_10472	ATACGTAATGTGAATTGCAGAATTCAGTGAATCATCGAATCTTTGAACGCATATTGCGCTCTTTGGTATTCCGAAGAGCATGCTTGTTTGAGTATCAGTAAACACCTCAAAGCTTTTGATTTTTTTTGAAAGCTTTGGACTTGAGCGATCCCAACACCAATCTTTCAGATCGGCGGCGGGTTGCTTGAAATGCAGGTGCAGCTGGACATTCTCCTGAGCTAAAAGCATATTTATTTAGTCCCGTCAAACGGATTATTACTTTTGCTGCAGCTAATATAAAGGGAGTTTGACCGTATTGGCTGACTGATGCAGGATTTCACAAGGGTCGGCAACGATTCTTGTAAAACTCGATCTCAAATCAAGTAAGACTACCCGCTGAACTTA	k__Fungi(100);p__Zygomycota(100);c__Mortierellomycotina_cls_Incertae_sedis(100);o__Mortierellales(100);f__Mortierellaceae(100);g__Mortierella(100);unclassified(100);
Otu0180	1	2	0	0	2	0	0	0	0	0	M03053_189_000000000-D2L8J_1_1102_22757_13818	ATACGTAATGTGAATTGCAGAATTCAGTGAATCATCGAATCTTTGAACGCATATTGCGCTCTTTGGTATTCCGAAGAGCATGCTTGTTTGAGTATCAGTAAACACCTCAAAGCTTTTGATTTTTTTTGAAAGCTTTGGACTTGAGCGATCCCAACACCAATCTTTCAGATCGGCGGCGGGTTGCTTGAAATGCAGGTGCAGCTGGACATTCTCCTGAGCTAAAAGCATATCTATTTAGTCTGCCTCAAAACAGATTATTACCTTTGCTGCAGCTAACATAAAGGAGATTAGTTCTTGTGCTGACTGATGCAGGATTCACAAAGACCGCTTCGGCTGTCTTTGTAAACTCGATCTCAAATCAAGTAAGACTACCCGCTGAACTTA	k__Fungi(100);p__Zygomycota(100);c__Mortierellomycotina_cls_Incertae_sedis(100);o__Mortierellales(100);f__Mortierellaceae(100);g__Mortierella(100);unclassified(100);
Otu0259	0	0	0	0	2	0	0	0	0	0	M03053_189_000000000-D2L8J_1_1102_21171_7321	ATACGTAATGTGAATTGCAGAATTCAGTGAATCATCGAATCTTTGAACGCACATTGCGCTCTCTGGTATTCCGGAGAGCATGCTTGTTTGAGTATCAGTAAACACCTCAATTTCATGATTTTTTATTTTGAAATTGGACTTGAGCATATCCCAACGTGTAATTAATTATATGGAGGGTTGCTTCAAATGCAGGTGCAGCCGATCATTCTTCTGGGCTAAAAGCATTATCTAGTTAGTCCCGTAAAACGGATTATTCATTTTATTGCTGCAGCTTACCTTATAAAAGGAAGACATGGCCATTGTGCTGACTGATGCAGGATTTCTCAGAGGGTCTGCAAAGACCTTTTGAAAACTCTATCTCAAATCAAGTAAGACTACCCGCGGAACTTA	k__Fungi(100);p__Zygomycota(100);c__Mortierellomycotina_cls_Incertae_sedis(100);o__Mortierellales(100);f__Mortierellaceae(100);g__Mortierella(100);s__Mortierella_bisporalis(100);
Otu0003	1835	1543	0	75	1	2	30	30	26	31	M03053_189_000000000-D2L8J_1_1102_15846_16160	ATACGTAATGTGAATTGCAGAATTCAGTGAATCATCGAATCTTTGAACGCATCTTGCGCTCCGGGGTATTCCTCGGAGCATGCCTGTTTGAGTGTCGTGGACATCTCAACCCCGCCGGGTTTTTTCCCGGTTGTGGGCTTGGATCGTGACGGATGCCGGCTGGAAGGTGTGGCTCTGTCGAAATACAAGAGTGGCTGACTCCCTATCCGGCCTGACTCGGCGTGATAATCAGACATCGCCGATTACGGAGAGGGGCAAAGGCTGCTTCGAAAGATAATGATCAACAAGACCTCAAATCAGGTAGGACTACCCGCTGAACTTA	k__Fungi(100);p__Basidiomycota(100);c__Pucciniomycotina_cls_Incertae_sedis(100);o__Pucciniomycotina_ord_Incertae_sedis(100);f__Pucciniomycotina_fam_Incertae_sedis(100);g__Paratritirachium(100);unclassified(100);
Otu0004	222	929	72	34	1	1	1	12	11	4	M03053_189_000000000-D2L8J_1_1101_17349_5809	ATAAGTAATGTGAATTGCAGAATTCAGTGAATCATCGAATCTTTGAACGCACCTTGCGCTCCCTAGTATTCTGGGGAGCATGTCTGTTTGAGTGTCATGAACTCTTCAACCCACTGGTTTCTTGTAGACTAGCTGGTGTTTGGATTTTGAACGTTGCTGGTCTTCGGACGTAGCTCGTTCGTAATGCATTAGCATCTCTAATTCGAATTCGGATTGACTCAGTGTAATAGACTATTTGCTGAGGACACTTTTATTAGTGGCCGAACAAGATAATTGTAGAAGCTTCAAACCTCTATGGTCAATTTTAGATTAGACCTCAGATCAGGCAGGATTACCCGCTGAACTTA	k__Fungi(100);p__Basidiomycota(100);c__Microbotryomycetes(100);unclassified(100);unclassified(100);unclassified(100);unclassified(100);
Otu0010	70	164	10	9	1	0	2	2	1	1	M03053_189_000000000-D2L8J_1_1101_21839_7198	ATACGTAATGTGAATTGCAGAATTCCGTGAATCATCGAATCTTTGAACGCACATTGCGCCCGGTAGCACTCTACCGGGCATGCCTGTTCGAGCGTCGAACTACCCTCTATTACGGTGTTGGGGACTACTTGTAGCCCTGAAATATAGTGGCGGCCGTTCTAAGCCTTTGCGAAGTCCAATACGCAACAGGGGATGAAATCGGTTCCTGCCTTGTTTACCACTTTTGAAGACGACCTCGAATCAGGTAGGATTACCCGCTGAACTTA	k__Fungi(100);unclassified(100);unclassified(100);unclassified(100);unclassified(100);unclassified(100);unclassified(100);
Otu0026	5	14	86	1	1	0	0	0	1	0	M03053_189_000000000-D2L8J_1_1101_25217_15700	ATACGTAATGTGAATTGCAGAATTCAGTGAATCATCGAGTCTTTGAACGCACATTGCGCCCCCTGGTATTCCGGGGGGCATGCCTGTCCGAGCGTCATTGCTGCCCTCAAGCACGGCTTGTGTGTTGGGCCGCCGTCCCCTCACGGGGACGGGTCCGAAAGGCAGCGGCGGCACCGCGTCCGGTCCTTGAGCGCATGGGGCTTTGTCACCCGCTCTGAAGGCCTGGCCGGCGCCTGCCGACAACCATCTTTTATTCAGGTTGACCTCGGATCAGGTAGGGATACCCGCTGAACTTA	k__Fungi(100);p__Ascomycota(100);c__Eurotiomycetes(100);o__Eurotiales(100);f__Trichocomaceae(100);unclassified(100);unclassified(100);
Otu0028	28	44	28	5	1	0	0	0	1	0	M03053_189_000000000-D2L8J_1_1102_5798_17988	ATAAGTAATGTGAATTGCAGAATTCAGTGAATCATCGAATCTTTGAACGCACATTGCGCCCCCTGGTATTCCGGGGGGCATGCCTGTTCGAGCGTCATTACAACCCTCAAGCTCTGCTTGGTATTGGGCTCTGCCGGTCCCGGCAGGCCTTAAAATCAGTGGCGGTGCCATTCGGCTTCAAGCGTAGTAATTCTTCTCGCTTCGGAGACCCGGGTGCGTGCTTGCCAGCAACCCCCAATTTTTTTCAGGTTGACCTCGGATCAGGTAGGGATACCCGCTGAACTTA	k__Fungi(100);p__Ascomycota(100);c__Pezizomycotina_cls_Incertae_sedis(100);o__Pezizomycotina_ord_Incertae_sedis(100);f__Pseudeurotiaceae(100);g__Pseudeurotium(100);s__Pseudeurotium_hygrophilum(64);
Otu0047	7	2	42	0	1	0	0	0	0	0	M03053_189_000000000-D2L8J_1_1101_24007_17853	ATAAGTAATGCGAATTGCAGAATTTCCGTGAGTCATCGAATCTTTGAACGCACATTGCGCCCACTGGTATTCCGGTGGGCATGCCTGTTCGAGCGTCATTATCCTCCCTCAAACCCCAGGTTTGGTGTTGGACCCAAGTTGTGTGAACAACTGGTCTCAAAGACAATGACGGCGTCCGTGGGACCCTCGGTGCAACGAGCTTTTAGGAGCACGCATCGAGTTGCAAGGACCTTCCGGGCCGGTCTCCTTTACTATTTTACAAGGTTGACCTCGGATCAGGTAGGAATACCCGCTGAACTTA	k__Fungi(100);p__Ascomycota(100);c__Pezizomycotina_cls_Incertae_sedis(100);o__Pezizomycotina_ord_Incertae_sedis(100);f__Pezizomycotina_fam_Incertae_sedis(100);g__Knufia(100);s__Knufia_tsunedae(100);
Otu0136	0	0	7	0	1	0	0	0	0	0	M03053_189_000000000-D2L8J_1_1102_4050_17210	ATACGTAGTGTGAATTGCAGAATTCCGTGAATCATCGAATCTTTGAACGCAAATTGCGCTCGAGGCCTTCGGGTCAAGAGCATGTCTGTTTCAGCGTCGGCTATCCAATCAAACCCCTTTTCTTTTGTGGAAAGAGGCTTTGGAGCTGACTGTCTCCAGCCTGCATGGGCAGGAGTCTGTCGAATAGCATCGGCTATGGTGACCCATTTAAGGGGATCCGGATTGGTAGGTGACCTTACGGTTACAAAGCCACCGGAGCCCTGGGTGTTGCTGTAGCCTGCAGGAATCGAGGAGTGCAAGCTCCTTTCCTTTCGACCTGAAATCAGGCAAGACCACCCGCTGAACTTA	k__Fungi(100);unclassified(100);unclassified(100);unclassified(100);unclassified(100);unclassified(100);unclassified(100);
Otu0002	1027	2348	9	163	0	1	11	21	17	22	M03053_189_000000000-D2L8J_1_1101_17089_21479	ATACGTAATGTGAATTGCAGAATTCAGTGAATCATCGAGTCTTTGAACGCACATTGCGCCCCCTGGTATTCCGGGGGGCATGCCTGTCCGAGCGTCATTGCTGCCCTCAAGCACGGCTTGTGTGTTGGGCCTCCGTCCTCCTCCCGGGGGACGGGCCCGAAAGGCAGCGGCGGCACCGCGTCCGGTCCTCGAGCGTATGGGGCTTCGTCACCCGCTCTTGTAGGCCCGGCCGGCGCTTGCCGACACATCAATCTTTTTTCCAGGTTGACCTCGGATCAGGTAGGGATACCCGCTGAACTTA	k__Fungi(100);p__Ascomycota(100);c__Eurotiomycetes(100);o__Eurotiales(100);f__Trichocomaceae(100);g__Penicillium(100);s__Penicillium_decumbens(97);
Otu0005	488	587	24	24	0	0	5	5	7	5	M03053_189_000000000-D2L8J_1_1101_22890_16595	ATAAGTAGTGTGAATTGCAGAATTCAGTGAATCATCGAATCTTTGAACGCACATTGCGCCCCTTGGTATTCCATGGGGCATGCCTGTTCGAGCGTCATTTGTACCTTCAAGCTCTGCTTGGTGTTGGGTGTTTGTCTCGCCTTGCGCGTAGACTCGCCTTAAAACAATTGGCAGCCGGCGTATTGATTTCGGAGCGCAGTACATCTCGCGCTTTGCACTCATAACGACGACGTCCAAAAGTACTTTTTACACTCTTGACCTCGGATCAGGTAGGGATACCCGCTGAACTTA	k__Fungi(100);p__Ascomycota(100);c__Dothideomycetes(100);o__Pleosporales(100);unclassified(100);unclassified(100);unclassified(100);
Otu0006	464	428	33	35	0	1	7	4	7	2	M03053_189_000000000-D2L8J_1_1101_24149_15978	ATACGTAATGTGAATTGCAGAATTCAGTGAATCATCGAGTCTTTGAACGCACATTGCGCCCTCTGGTATTCCGGAGGGCATGCCTGTCCGAGCGTCATTGCTGCCCTCAAGCACGGCTTGTGTGTTGGGCTCCGTCCCCCGATCCCGGGGGACGGGCCCGAAAGGCAGCGGCGGCACCGCGTCCGGTCCTCGAGCGTATGGGGCTTTGTCACCCGCTCTGTAGGCCCGGCCGGCGCTTGCCGATCAACCAAATTTTTATCCAGGTTGACCTCGGATCAGGTAGGGATACCCGCTGAACTTA	k__Fungi(100);p__Ascomycota(100);c__Eurotiomycetes(100);o__Eurotiales(100);f__Trichocomaceae(100);g__Penicillium(100);unclassified(100);
Otu0007	221	243	4	25	0	0	5	2	3	1	M03053_189_000000000-D2L8J_1_1101_18476_23707	ATAAGTAATGTGAATTGCAGAATTCAGTGAATCATCGAATCTTTGAACGCACATTGCGCCCTCTGGTATTCCGGGGGGCATGCCTGTTCGAGCGTCATTACAACCCTCAAGCTCTGCTTGGTATTGGGCTCTGCCGGTCCTGGCAGGCCTCAAAGTCAGTGGCGGTGCCATCCGGCTCCAAGCGTAGTAATTCTTCTCGCTTCGGAGGCCGCGGTGCGTGCTAGCCAGCAACCCCCAATTTTTTTCAGGTTGACCTCGGATCAGGTAGGGATACCCGCTGAACTTA	k__Fungi(100);p__Ascomycota(100);unclassified(100);unclassified(100);unclassified(100);unclassified(100);unclassified(100);
Otu0008	182	14	139	0	0	0	0	0	4	1	M03053_189_000000000-D2L8J_1_1101_18723_3891	ATAACTAATGTGAATTGCAGAATTCCGTGAATCATCGAGTCTTTGAACGCACATTGCGCCCCACGGTATTCCGTGAGGCATGCCCGTCTCAGCGTCAGTAAACAACATCAAACTTTAGACTTGTGTCGAAGTTTGGACAGTGTCAGGGAAGTCGTTACCAACACAGTGACGGCCCCTTGGAAATCCATAGGTGTTTATGCCGCCACGAATGGAACGTGATGAGAATTCCTTCGTTCCAGAGTGGATGGCATGGGCCACCCAGAAACCCACATGCTTTACGGCATTGCTTCTGTCTTGACCTGAGATCGGGTAGGGATACCCGCTGAACTTA	k__Fungi(100);unclassified(100);unclassified(100);unclassified(100);unclassified(100);unclassified(100);unclassified(100);
Otu0009	102	160	1	4	0	0	1	0	1	1	M03053_189_000000000-D2L8J_1_1101_24036_5678	ATACGTAATGTGAATTGCAGAATTCAGTGAATCATCGAGTCTTTGAACGCACATTGCGCCCCCTGGTATTCCGGGGGGCATGCCTGTCCGAGCGTCATTGCTGCCCTCAAGCACGGCTTGTGTGTTGGGCCTCCGCCCCCCGGCTCCCGGGGGGCGGGCCCGAAAGGCAGCGGCGGCACCGCGTCCGGTCCTCGAGCGTATGGGGCTTCGTCACCCGCTCCGTAGGCCCGGCCGGCGCCCGCCGGCGACCCCCCTCAATCTTTCCAGGTTGACCTCGGATCAGGTAGGGATACCCGCTGAACTTA	k__Fungi(100);p__Ascomycota(100);c__Eurotiomycetes(100);o__Eurotiales(100);f__Trichocomaceae(100);g__Penicillium(100);unclassified(100);
Otu0011	67	148	0	14	0	0	0	4	4	0	M03053_189_000000000-D2L8J_1_1101_14967_7802	ATACGTAATGTGAATTGCAGAATTCAGTGAATCATCGAATCTTTGAACGCACATTGCGCCCGCCAGCACTCTGGCGGGCATGCCTGTTCGAGCGTCATTTCAACCATCAAGCCCCAGGCTTGCGTTGGAGCCCTGCGGCTGCCGCAGCCTCCCAAAAGCAGTGGCGGGCTCGCTATCACACCGAGTGCAGTAGATTACTCTTCGCTCAGGGCGTGTGGCGGGTTCCAGCCGTGAAACCCCCTACTTCTCAAGGTTGACCTCGGATCAGGTAGGAATACCCGCTGAACTTA	k__Fungi(100);p__Ascomycota(100);c__Sordariomycetes(100);o__Sordariales(100);f__Lasiosphaeriaceae(100);unclassified(100);unclassified(100);
Otu0013	203	9	0	0	0	0	3	0	3	0	M03053_189_000000000-D2L8J_1_1101_16791_3179	ATAAGTAGTGTGAATTGCAGAATTCAGTGAATCATCGAATCTTTGAACGCACATTGCGCCCCTTGGTATTCCATGGGGCATGCCTGTTCGAGCGTCATTTGTACCCTCCAGCCCTGCTGGGTGTTGGGCGTTTGTTCCGCCGCGTGCGTGAACTCGCCTCAAATACATTGGCAGCCCGCCGTCCCGTGTGGGAGCGCAGCACATTTTGCGCTCTCCGCTGCAGACGGCGGCATCCACAAGTCTACACCTTTACGCTTGACCTCGGATCAGGTAGGGATACCCGCTGAACTTA	k__Fungi(100);p__Ascomycota(100);c__Dothideomycetes(100);o__Pleosporales(100);f__unclassified_Pleosporales(100);g__unclassified_Pleosporales(100);s__Pleosporales_sp(100);
Otu0015	74	85	20	6	0	0	0	0	2	2	M03053_189_000000000-D2L8J_1_1101_23664_5712	ATAAGTAATGCGAATTGCAGAATTCAGTGAATCATCGAATCTTTGAACGCACATTGCGCCCGCCAGTATTCTGGCGGGCATGCCTGTCTGAGCGTCAGTTCAACCCTCGCAACCGGCTTTCTTGCTGGATGTGGTGTTGGGGATCGGCTGCCTTCTAGGTGGCCGGCCCCGAAATAGAGTGGCGGTCTCGTCGTGGCCTCCTCTGCGTAGTAGCAATATCTCGCAGGCGGAGAGCGGCGTGGCTATGCCGTAAAACACCCAACTCTTCTAAGGTTGACCTCAGATCAGGTAGGAATACCCGCTGAACTTA	k__Fungi(100);p__Ascomycota(100);c__Sordariomycetes(100);o__Hypocreales(100);f__Hypocreales_fam_Incertae_sedis(100);g__Acremonium(100);s__Acremonium_alternatum(100);
Otu0016	60	98	0	4	0	0	2	1	2	0	M03053_189_000000000-D2L8J_1_1101_21744_5332	ATAACTAATGTGAATTGCAGAATTCAGTGAATCATCGAGTCTTTGAACGCACATTGCGCCCCCTGGTATTCCGGGGGGCATGCCTGTCCGAGCGTCATTGCTGCCCTCAAGCCCGGCTTGTGTGTTGGGTCGCCGTCCTCCCCTCCCGGGGGGGACGGGCCCGAAAGGCAGCGGCGACTTCGCGTCCGGTCCTCGAGCGTATGGGGCTTCGTCACTCCGCTCTAGTAGGAACGGCCGATAGTCTGCCGACTTACCAACCTTTTTTTTCCAGGTTGACCTCGGATCAGGTAGGGATACCCGCTGAACTTA	k__Fungi(100);p__Ascomycota(100);c__Eurotiomycetes(100);o__Eurotiales(100);f__Trichocomaceae(100);g__Penicillium(91);s__Penicillium_humicoloides(86);
Otu0017	50	98	1	5	0	0	0	1	0	0	M03053_189_000000000-D2L8J_1_1101_22619_6598	ATAAGTAATGTGAATTGCAGAATTCAGTGAATCATCGAATCTTTGAACGCACATTGCGCCCCTTGGTATTCCGAGGGGCATGCCTGTTCGAGCGTCATTATAACCCCTCAAGCTCAGCTTGGTGTTGGGGCCTGCCGCACGGGCAGCCCTTAAAATCAGTGGCGGTGCCATCTGGCTCTAAGCGTAGTAATTCTTCTCGCTATAGAGTCACGGTGGATGCTTGCCATTAACCCCCAATTTTCAATGGTTGACCTCGGATCAGGTAGGGATACCCGCTGAACTTA	k__Fungi(100);p__Ascomycota(100);c__Leotiomycetes(100);unclassified(100);unclassified(100);unclassified(100);unclassified(100);
Otu0018	87	54	0	0	0	0	2	0	2	0	M03053_189_000000000-D2L8J_1_1101_12226_4379	ATAAGTAATGTGAATTGCAGAATTCCGTGAATCATCGAATCTTTGAACGCACATTGCGCCCCCTGGCATTCCGGGGGGCATGCCTGTCCGAGCGTCATTGCTACCCTCAAGCGCGGCTTGTGTGTTGGGCGCTGTCCCCCCGGGGACAGGCCTGAAAGGCAGTGGCGGCGTCGCGTCCGGTCCTCGAGCGTATGGGGCTTTGTCACTCGCTCTGTGGGGTCCGGCCGGGGCCTGTCTACCCAATCTTTTCTCAAGGTTGACCTCGGATCAGGTAGGGATACCCGCTGAACTTA	k__Fungi(100);p__Ascomycota(100);c__Eurotiomycetes(100);o__Eurotiales(100);f__Trichocomaceae(100);g__Sagenomella(100);s__Sagenomella_diversispora(100);
Otu0019	20	87	21	5	0	0	0	0	0	3	M03053_189_000000000-D2L8J_1_1101_19699_8082	ATAAGTAATGTGAATTGCAGAATTCAGTGAATCATCGAATCTTTGAACGCACATTGCGCCCCCTGGTATTCCGGGGGGCATGCCTGTTCGAGCGTCATTTCACCACTCAAGCCTCGCTTGGTATTGGGCAACGCGGTCCGCCGCGTGCCTCAAATCGACCGGCTGGGTCTTCTGTCCCCTAAGCGTTGTGGAAACTATTCGCTAAAGGTGGTTCGGGAGGCTACGCCGTAAAACAACCCCATTTCTAAGGTTGACCTCGGATCAGGTAGGGATACCCGCTGAACTTA	k__Fungi(100);p__Ascomycota(100);c__Dothideomycetes(100);o__Capnodiales(100);f__Davidiellaceae(73);g__Cladosporium(73);s__Cladosporium_langeronii(73);
Otu0022	112	8	0	2	0	0	5	2	1	3	M03053_189_000000000-D2L8J_1_1101_21349_7446	ATAAGTAATGTGAATTGCAGAATTCAGTGAATCATCGAATCTTTGAACGCACCTTGCGCCCTTTGGCTATTCCGAAGGGCATGCCTGTTTGAGTATCATGAACACCTCAACTCTTCATGGTTTTTCCATGATGGGCTTGGACTTTGGGGGTTTTGCTGGCCTGTGGTCAGCTCCTCTCAAATGAATCAGCTTTCCAGTGTTTGGCAGCATCACAGGTGTGATAACTATCTACGCTTGTGGTTTTCTGCCAGGTAATCCTCAGTGATGGGGATTCACTGGGGCTCATAAACGTCTCTCCTCAGTGAAGACAGCTTTGTGAACGTTTGATCTCAAATCAGGTAGGACTACCCGCTGAACTTA	k__Fungi(100);p__Basidiomycota(100);c__Agaricomycetes(100);o__Thelephorales(100);f__Thelephoraceae(100);unclassified(100);unclassified(100);
Otu0023	26	82	0	24	0	0	0	0	0	0	M03053_189_000000000-D2L8J_1_1101_12539_2367	ATAAGTAATGTGAATTGCAGAATTCAGTGAATCATCGAATCTTTGAACGCACCTTGCGCTCCTTGGTATTCCGAGGAGCATGTCTGTTTGAGTGTCATGAACTCTTCAACCCATCAGTTTCTTATGAACTGGCTGGTGTTTGGTTTCTGAGCGCTGCTGGTCCACGGATCGAGCTCGTTCGTAATGCATTAGCATCTCTAATTCGACTTCGGATTGACTCAGTGTAATAGACTATTCGCTGAGGACACGCCTCACGGTGTGGCCGAATGAGATCTCAGTAGAAGCTGCCAACCCTTCTAGTCAATTTAAGATTAGACCTCAGATCAGATAGGATTACCCGCTGAACTTA	k__Fungi(100);p__Basidiomycota(100);c__Microbotryomycetes(100);o__Leucosporidiales(100);f__Leucosporidiaceae(100);unclassified(100);unclassified(100);
Otu0027	95	10	0	2	0	0	0	0	1	0	M03053_189_000000000-D2L8J_1_1101_20479_3262	ATAAGTAGTGTGAATTGCAGAATTCAGTGAATCATCGAATCTTTGAACGCACATTGCGCCCCTTGGTATTCCATGGGGCATGCCTGTTCGAGCGTCATTTGTACCTTCAAGCTCTGCTTGGTGTTGGGTGTTTGTCCTTTCCCTCGGGAGCAAGACTCGCCTTAAATTTATTGGCAGCCAGTATTTTGGTTTTGAAGCGCAGCACATGTCGCGAATCAAGCCCGAATAGTAGCTTCCATTAAGCCTTTACTATCACTTTTGACCTCGGATCAGGTAGGGATACCCGCTGAACTTA	k__Fungi(100);p__Ascomycota(100);c__Dothideomycetes(100);o__Pleosporales(100);unclassified(100);unclassified(100);unclassified(100);
Otu0029	83	20	0	0	0	0	0	0	0	0	M03053_189_000000000-D2L8J_1_1101_18334_3810	ATAAGTAATGTGAATTGCAGAATTCAGTGAATCATCGAATCTTTGAACGCACATTGCGCCCCTTGGTATTCCGAGGGGCATGCCTGTTCGAGCGTCATTATAACCCTCAAGCTCAGCTTGGTGTTGGGGCCTGCTGCACTGGCAGCCCTTAAAATCAGTGGCGGCGCCATCTGGCTCTAAGCGTAGTAATTCTTCTCGCTATGGAGTCCTGGTGGATGCTTGCCATCAACCCCCAATTTTTCTATGGTTGACCTCGGATCAGGTAGGGATACCCGCTGAACTTA	k__Fungi(100);p__Ascomycota(100);c__Leotiomycetes(100);unclassified(100);unclassified(100);unclassified(100);unclassified(100);
Otu0030	32	8	54	5	0	0	0	0	0	0	M03053_189_000000000-D2L8J_1_1101_13282_3993	ATAAGTAATGTGAATTGCAGAATTCCGTGAATCATCGAATCTTTGAACGCACATAGCACCCTTTGGCATTCCTTAGGGCATACCTGTTCGAGCGTCACTATAAATCCTCTCACAAATATTGTGGTCTTGGCTTAAGTATCTTTACTAGTACATGAAAATGATCTTGTATGATACTGTGTCAAAATACATAGGGTGGATAGCCAGATCGAGTAACAAACTTCATAAATGTCTAAAAGATATAAATCAGTTGTCTCTCAAACCTGAGCCTATCATCCGTAGATCCCCCATTCACGAAGAATCATGGATTGACCTCGAATCAGGTAGGGATACCCGCTGAACTTA	k__Fungi(100);unclassified(100);unclassified(100);unclassified(100);unclassified(100);unclassified(100);unclassified(100);
Otu0031	82	1	0	3	0	0	0	0	1	0	M03053_189_000000000-D2L8J_1_1101_26753_6761	ATAAGTAGTGTGAATTGCAGAATTCAGTGAATCATCGAATCTTTGAACGCACATTGCGGCCATAGGTATTCCTTTGGCCATGCCTGTTCGAGCGTCATTTACACCCTCAAGCCTAGCTTGGTGTTGGGCGTCTGTCCCGCCGTTCTCGCGCGCGGACTCGCCTCAAAGTCATTGGCGGCGGTCGTGCCGGCCCCCTCGCGCAGCACATTTGCGCTTCTCGGAGGCCCGGCGGATCCGCGCTCCAGCAAGACCTTTCACGACTTGACCTCGGATCAGGTAGGGATACCCGCTGAACTTA	k__Fungi(100);p__Ascomycota(100);c__Dothideomycetes(100);o__Pleosporales(100);f__Pleosporales_fam_Incertae_sedis(100);g__Periconia(100);s__Periconia_macrospinosa(96);
Otu0033	38	45	0	0	0	0	0	0	2	0	M03053_189_000000000-D2L8J_1_1101_24795_6992	AAAAGCAATGCGAATTGCAGAATTCCGCGAGTCATCAGATCTTCGAACGCACCTGGCGCCGACCGGATCTCCGATTGGCATGCTTGTTTCAGTGTCTTGTTACGACTCACACATCATAATGTGATTGACTCTGGATGTGGGTGAAAACCTCTTCCGGTGTCTCTCATGAAGTGAGCGCTGGACCGACGAAACCGATGCAGTAGTCACTCTCGCAGTGATACTCATTGGAACTCGGCGGAGTACTCCTGCGTAATAAATCGATAACATCACAACGCATCTGAGGCAAGCAAGAACACCCGCTGAACTTA	k__Fungi(100);unclassified(100);unclassified(100);unclassified(100);unclassified(100);unclassified(100);unclassified(100);
Otu0034	53	19	0	2	0	7	0	0	0	1	M03053_189_000000000-D2L8J_1_1101_13770_8175	ATACGTAATGTGAATTGCAGAATTCAGTGAATCATCGAGTCTTTGAACGCACATTGCGCCCTCTGGTATTCCGGAGGGCATGCCTGTCCGAGCGTCATTGCTGCCCTCAAGCACGGCTTGTGTGTTGGGCTCCGTCCTCCTTCCGGGGGACGGGCCCGAAAGGCAGCGGCGGCACCGCGTCCGGTCCTCAAGCGTATGGGGCTTTGTCACCCGCTTTGTAGGACTGGCCGGCGCCTGCCGATCAACCAAACTTTTTTCCAGGTTGACCTCGGATCAGGTAGGGATACCCGCTGAACTTA	k__Fungi(100);p__Ascomycota(100);c__Eurotiomycetes(100);o__Eurotiales(100);f__Trichocomaceae(100);g__Penicillium(100);s__Penicillium_brevicompactum(80);
Otu0036	41	24	0	13	0	0	0	0	0	0	M03053_189_000000000-D2L8J_1_1101_18040_8781	ATACGCAGTGCGAATTGCAGAACGCGAGTCATCAGATCTTTGAACGCAAGTGGCGCCGGTTAGCAGCCGGCATGTGGGGCTCAGTGTGTATGGAAATCACAAACGCGAAATGTGGTTGAAGCGTGCAGCCTCTCGGGGCGAAGCTTCTCCCATTAAACGCAGCGGGAGCGACGCGCTAATACCTCCAGGTAGGCGTCTCGTCACAATTCCTCTCTCCCTCTCCGGAAGTAGTCACTAGCATCCTAGTGATCTACGGAAAGGTGGGTTGAGTACCGTGGCATCACAAAAGGGACGCCTATTCTGTTTAGTGCACTCAATCGTTCATCGATAAACCCCCAATTGATTATCTCCTCACACGACACCTGAGTTCCGCAAGACAACCCGCTGAACTTA	k__Fungi(100);p__unclassified_Fungi(100);c__unclassified_Fungi(100);o__unclassified_Fungi(100);f__unclassified_Fungi(100);g__unclassified_Fungi(100);s__Fungi_sp(100);
Otu0037	2	4	65	1	0	0	0	0	0	0	M03053_189_000000000-D2L8J_1_1101_23667_10199	ATAAGTAATGTGAATTGCAGAATTCAGTGAATCATCGAATCTTTGAACGCACCTTGCGCCCTTTGGCTATTCCGAAGGGCATGCCTGTTTGAGTATCATGAACACCTCAACTCTCATGGCTTGCCATGACGAGCTTGGACTTTGGGGGTCTTGCTGGCCTGTGGTTGGCTCCTCTCAAATGAATCAGCTTGCCAGTGTTTGGTGGCATCACAGGTGTGATAACTATCTACGCTTGTGGTCTTCCACCAGGTAACCTTCAGTGATGGAGGTTCACTGGGGCTCATAAATGTCTCTCCTCAGCGAGGACAGCTCTTTGAACGTTTGATCTCAAATCAGGTAGGACTACCCGCTGAACTTA	k__Fungi(100);p__Basidiomycota(100);c__Agaricomycetes(100);o__Thelephorales(100);f__Thelephoraceae(100);g__Tomentella(100);unclassified(100);
Otu0038	27	35	8	0	0	0	0	0	0	0	M03053_189_000000000-D2L8J_1_1101_10249_5025	ATAAGTAATGTGAATTGCAGAATTCAGTGAATCATCGAATCTTTGAACGCACATTGCGCCCCTTGGTATTCCGAGGGGCATGCCTATTCGAGCGTCATTATCACCCCTCAAGCCTAGCTTGGTGTTGAGACCTGCTGTCAAGGCAGTCTCTAAAATCAGTGGCAGTGCTGTCAGGCTCTAAGCGTAGTAAATTCATCGCTATAGACACCTGGTGGCCACTCGCCAGAACCCCCCCATTTTTTAATGATTGACCTCGGATTAGGTAGGGATACCCGCTGAACTTA	k__Fungi(100);p__Ascomycota(100);c__Leotiomycetes(100);o__Helotiales(100);f__Helotiales_fam_Incertae_sedis(100);g__Tetracladium(100);unclassified(61);
Otu0039	14	51	0	1	0	0	0	0	0	1	M03053_189_000000000-D2L8J_1_1101_17268_5154	ATAAGTAATGTGAATTGCAGAATTCAGTGAATCATCGAATCTTTGAACGCACATTGCACCCTCTGGTATTCCGGGGGGTATGCCTGTTCGAGCGTCATTACAACCCTCAAGCTCTGCTTGGTATTGGATGTGATTTCTCTAATCCATCCTAAAATTAGTGGCGGTGCCATCTGGTTTCCAGCGTAGTAATTTTCTCGCTGTGGATGTCTAGGTGTTATCTGCCAACAACCCTCTATTTTTTAAAGGTTGACCTCGGATCAGGTAGGGATACCCGCTGAACTTA	k__Fungi(100);p__Ascomycota(100);unclassified(100);unclassified(100);unclassified(100);unclassified(100);unclassified(100);
Otu0040	25	33	2	0	0	0	0	0	0	1	M03053_189_000000000-D2L8J_1_1101_10431_5531	ATAAGTAATGCGAATTGCAGAATTCCGTGAGTCATCGAATCTTTGAACGCACATTGCGCCCTTTGGTATTCCGAAGGGCATGCCTGTTCGAGCGTCATTATCAACCCTCAAGCCCGGCTTGCGGTTGGGTCTCACCGTGGGCAGCCACGGCGGATCCGAAAGATAATGGCGGTGCCCGTGGGACCCTGGATGCAATGAGCTTTTCAGCACGCGTCCGCGTGGACCCCCGGCGCCGGCTCAACCAATCTACCTTGCAGATTGACCTCGGATCAGGTAGGGATACCCGCTGAACTTA	k__Fungi(100);p__Ascomycota(100);c__Eurotiomycetes(100);o__Verrucariales(100);f__Verrucariaceae(100);g__unclassified_Verrucariaceae(94);s__Verrucariaceae_sp(94);
Otu0041	4	13	42	0	0	0	0	0	1	0	M03053_189_000000000-D2L8J_1_1101_22925_5632	ATAAGTAATGTGAATTGCAGAATTCAGTGAATCATCGAATCTTTGAACGCACATTGCGCCCGCCAGTATTCTGGCGGGCATGCCTGTCCGAGCGTCATTTCAACCCTCGAACCCCTCCGGGGGGTCGGCGTTGGGGATCGGCCCTGCCTTTGGCGGTGGCCGTCTCCGAAATACAGTGGCGGTCTCGCCGCAGCCTCTCCTGCGCAGTAGTTTGCACACTCGCATCGGGAGCGCGGCGCGTCCACAGCCGTTAAACACCCAACTTCTGAAATGTTGACCTCGGATCAGGTAGGAATACCCGCTGAACTTA	k__Fungi(100);p__Ascomycota(100);c__Sordariomycetes(100);o__Hypocreales(100);f__Hypocreaceae(100);g__Trichoderma(100);unclassified(77);
Otu0042	16	37	0	5	0	0	0	1	0	0	M03053_189_000000000-D2L8J_1_1101_20867_15331	ATAAGTAGTGTGAATTGCAGAATTCAGTGAATCATCGAATCTTTGAACGCACATTGCGCTCCCTGGTATTCCGGGGAGCATGCCCGTTTCAGAATCATTAAAATCTCACAAACCCTGGTTTACGTTCGCGGAAACGGGGGGAAGTGGATGTGGGTGCAGTTGCAAGCCTGGCTTGCGATGCATCTATAAATGATTGTGACGTGCGCCAATTGTCGTGTCAACTGGTCGTCCGAAGCGCAACAGATTCATCTATTCGTTTTGGTCATCACTGACTGACTTGGAGGCATGGGACTCAACTTGTCAACCGGGGCCCTGCAGTTTGCAGAGCTCGCTGATAACTTGGTCTGAAATCGGGCAAGAAAACCCGCTGAACTTA	k__Fungi(100);p__Chytridiomycota(100);c__Chytridiomycetes(100);o__Spizellomycetales(100);f__Spizellomycetaceae(100);g__Spizellomyces(100);unclassified(100);
Otu0043	25	32	0	0	0	0	0	0	0	1	M03053_189_000000000-D2L8J_1_1101_23615_8290	ATACGTAGTGTGAATTGCAGAATACCTGGAACCATCGAATCTTTGAACGCAACTTGCGCTCGAGGCCTCGGCCAAGAGCATGTCTGCCTCAGCGTCGGCTTTCACCATCCTCAACCACCCCCTCTCTCACCAGAGGGCGCGTGCGCGAAGGAGAGCTGGCCGTTCCCGCTCGCTCGCGCGAGCCGGGTCGGCTGAAGATCATAGAGCGTGCACGTGCGACGACCTCGCCTCGCGGCGAGGGCGCATCAGCTGGGTAGCTGGCATCATGCCGGACGAAGGCTGCATGCCTCGCGTTGCCCACGTTTGAAAGCAGGAAACCATACCACCAACCATTCGACCTGAGCTCAGGCAAGGACACCCGCTGAACTTA	k__Fungi(100);unclassified(100);unclassified(100);unclassified(100);unclassified(100);unclassified(100);unclassified(100);
Otu0045	12	23	19	0	0	0	1	0	2	0	M03053_189_000000000-D2L8J_1_1101_18718_5776	ATACGTAATGTGAATTGCAGAATTCAGTGAATCATCGAATCTTTGAACGCACATTGCGCCCGCCAGCACTCTGGCGGGCATGCCTGTTCGAGCGTCATTTCAACCCTCAGAACCCCTTTGGGGGATCTGGCGTTGGGGATCGGCAGTCCTGCCGGCCCCGAAATATAGTGGCGGTCTCTCTGTGACCTTCCCTGTGTAGTAGCGATACCTCGCAGCGGGATAGCAGTTTGGCCACGCCGTAAAACACCCAACTTCTCAAGGTTGACCTCGAATCAGGTAGGAATACCCGCTGAACTTA	k__Fungi(100);p__Ascomycota(100);c__Sordariomycetes(100);o__Hypocreales(100);f__Hypocreales_fam_Incertae_sedis(100);g__Acremonium(100);s__Acremonium_asperulatum(100);
Otu0049	0	46	0	1	0	0	0	0	0	0	M03053_189_000000000-D2L8J_1_1101_20379_4683	ATACGTAGTGTGAATTGCAGAATTCCGTGAACCATCGAATCTTTGAACGCATATTGCGCCCGAGGCTTCGGCCGAGGGCATGTCTGCCTCAGCGTCGGTTTTACCCCTCGCTTTACCATCCTAGGATGGAGCCTTCGGGCTGTCAAAGCGGATCTGGCCCTCCCAACTTATCTAATAGGTTGGGTTGGCTGAAGTGCAGAGGCTAGAGCTTGGACCCAATATGGGCTTCAACTGGATAGGTAGCACCAGCCTCGGCTGACTACACGAAGTTGATGCTTGTGGTCTTTGCTGGCGGCCAGCAGGAAACCTTTAAACCTTCGACCTGAGCTCAGGCAAGATTACCCGCTGAACTTA	k__Fungi(100);unclassified(100);unclassified(100);unclassified(100);unclassified(100);unclassified(100);unclassified(100);
Otu0050	4	27	2	14	0	0	0	0	0	0	M03053_189_000000000-D2L8J_1_1101_24632_10799	ATAAGTAATGTGAATTGCAGAATTCAGTGAATCATCGAATCTTTGAACGCACATTGCGCCCGCCAGCATTCTGGCGGGCATGCCTGTTCGAGCGTCATTTCAACCCTCGAGCCCCCCCGGGGGCCTCGGTGTTGGGGGACGGCACACCAGCCGCCCCCGAAATGCAGTGGCGACCTCGCCGCAGCCTCCCCTGCGTAGTAGCACACACCTCGCACCGGAGCGCGGAGACGGTCACGCCGTAAAACGCCCAACTTCTTAGAGTTGACCTCGGATCAGGTAGGAATACCCGCTGAACTTA	k__Fungi(100);p__Ascomycota(100);c__Sordariomycetes(100);o__Hypocreales(100);f__Ophiocordycipitaceae(100);g__Purpureocillium(100);unclassified(69);
Otu0051	22	23	0	0	0	0	0	0	0	0	M03053_189_000000000-D2L8J_1_1101_21513_8812	ATAAGTAATGTGAATTGCAGAATTCAGTGAATCATCGAATCTTTGAACGCACATTGCGCCCTCTGGTATTCCGGGGGGCATGCCTGTTCGAGCGTCATTATAACCACTCAAGCTCTCGCTTGGTATTGGGGTTCGCGGTTCCGCGGCCCCTAAAATCAGTGGCGGTGCCTGTCGGCTCTACGCGTAGTAATACTCCTCGCGATTGAGTCCGGTAGGTCTACTTGCCAGCAACCCCCAATTTTTACAGGTTGACCTCGGATCAGGTAGGGATACCCGCTGAACTTA	k__Fungi(100);p__Ascomycota(100);c__Leotiomycetes(100);o__Helotiales(100);f__Helotiales_fam_Incertae_sedis(100);unclassified(100);unclassified(100);
Otu0052	0	0	42	0	0	0	0	0	0	0	M03053_189_000000000-D2L8J_1_1101_23914_4946	ATGCGATTTGCACGAATCTGTGAGTCATCTAATCTTTGAACGCGAATGGCACTGTTACGTAAGTAGCAGTATGTCTGTTTGAGAATCGCAAACACGATCAACTCTAGTTAGAGTTGGGATTGACCTCATGCGCTGTAATATGGCGCATTTGGTTTGAATTGATCAAGTTGATGGGCTTCCCAGCAATGCTCGATGTGTGCTAGCGAGACAGTCGTCCCGATCTCACATTAGTTGTTTTGTTGCAGAGCCCTAATCACAGCTTGTTTAACCTAATATCATCTATTACGATCTCAAATCAGGCAAGATTACCCGCTGAACTTA	k__Fungi(100);p__Rozellomycota(100);c__unclassified_Rozellomycota(100);o__unclassified_Rozellomycota(100);f__unclassified_Rozellomycota(100);g__unclassified_Rozellomycota(100);s__Rozellomycota_sp(100);
Otu0054	31	7	0	0	0	0	0	0	0	1	M03053_189_000000000-D2L8J_1_1101_24368_9013	ATAAGTAATGTGAATTGCAGAATTCAGTGAATCATCGAATCTTTGAACGCACCTTGCGCCCTTTGGACATTCCGAAGGGCATGCCTGTTTGAGTATCATGAACACCTCAACTCTCACGGCTTGTCCGTGATGAGCTTGGACTTTGGGGGTCTTTGCTGGCCTGTGGTCGGCTCCTCTCAAATGGATCAGCTTGCCAGTGTTTGGTGGCATCACAGGTGTGATAACTATCTGCGCTTGTGGTTTTCCATCAGATAACCTTCAGTGATATGGAGGTTCGCTGGAGCTCACAAATGTCTCTCCTTAGTGAGGACAGCTCTTTGAAGTTTGATCTCAAATCAGGTAGGACTACCCGCTGAACTTA	k__Fungi(100);p__Basidiomycota(100);c__Agaricomycetes(100);o__Thelephorales(100);f__Thelephoraceae(100);unclassified(100);unclassified(100);
Otu0055	26	7	0	6	0	0	0	0	0	0	M03053_189_000000000-D2L8J_1_1101_11655_2909	ATAAGTAGTGTGAATTGCAGAATTCAGTGAATCATCGAATCTTTGAACGCACATTGCGCCCTTCGGTATTCCGTTGGGCATGCCTGTTCGAGCGTCATTTAATCATTCAAGCTCTGCTTGGTGTTGGGTGTTTGTTCCGCCTCAGCGCGTGGACTCGCCTTAAATTCATTGGCAGCCGGTATGTTGGCTTCGTGCGCAGCACATTGCGTCGCGATTCTGGCAGGCCTCCTCCCATTAAGCTTCTTTTAAGTTTGACCTCGGATCAGGTAGGGATACCCGCTGAACTTA	k__Fungi(100);p__Ascomycota(100);c__Sordariomycetes(100);o__Sordariales(100);f__Chaetomiaceae(100);g__Trichocladium(100);s__Trichocladium_opacum(100);
Otu0056	0	36	0	0	0	0	0	0	0	0	M03053_189_000000000-D2L8J_1_1101_18739_6109	ATAAGTAATGTGAATTGCAGAATTCAGTGAATCATCGAATCTTTGAACGCACATTGCGCCCGCCAGTACTCTGGCGGGCATGCCTGTTCGAGCGTCATTTCAACCATCAAGCCCCAGGCTTGCGTTGGGGGCCTGCGGCTGCCGCAGCCCCTTAAAAACAGTGGCGGGCTCGCTGTCATTCCGAGCGCAGTAGTTACATCTCGCTCCGGGCGTGGCGGTGGGCACCTGCCGTGAAACACTCACTAAGGTTGACCTCGGATCAGGTAGGAATACCCGCTGAACTTA	k__Fungi(100);p__Ascomycota(100);c__Sordariomycetes(100);o__Sordariales(100);f__Lasiosphaeriaceae(100);g__Zopfiella(100);unclassified(100);
Otu0058	11	6	0	16	0	0	0	0	0	0	M03053_189_000000000-D2L8J_1_1101_26384_9001	ATAAGTAGTGTGAATTGCAGAATTCAGTGAATCATCGAATCTTTGAACGCACATTGCGCCCCTTGGTATTCCATGGGGCATGCCTGTTCGAGCGTCATTTGTATCTTCAAGCTTTGCTTGGTGTTGGGTGTTTGTCCTGCTCTATGCGTGGACTCGCCTTAAATCAATTGGCAGCCGGTAATCTGGTGTTAAGAGCGCAGCACATTGTGCGCTCCTCGCTGTGTATTGCGGCGTCCATTAAGCCTATATCTTTTGCTCTTGACCTCGGATCAGGTAGGGATACCCGCTGAACTTA	k__Fungi(100);p__Ascomycota(100);c__Dothideomycetes(100);o__Pleosporales(100);unclassified(100);unclassified(100);unclassified(100);
Otu0059	11	22	0	0	0	0	0	0	0	0	M03053_189_000000000-D2L8J_1_1101_22253_8753	ATACGTAGTGTGAATTGCAGAATCTCGTGAACCATCAAATCTTTGAACGCATATTGCGCTCGAGCCTTCGGGCAAGAGCATGTCTGGCTCAGCGTCGGGTTGATTCTCACCTCTCCTAATCCATTTACTTGAATTATCAGAGCGTGGACCTGGCTTTCCCAGAATGTTTACTTCAGTCTCTTCAGAGGCTTTAGTAAATCAAGCAGTCTGGGTTTGCTGAAGTATAGAGGCTAAGCGTGGACCCGTCAAGGGCCGCAACTGGGTAGGCAGCTTTATTGCTTGCTAAATGTCTAGTTGCTGGCTTGGGTTTTCATCTTAATGCCGACAAGCAGGAAGCTTACTATATTTTCTCGACCTGAGCTCAGGCAAGATTACCCGCTGAACTTA	k__Fungi(100);unclassified(100);unclassified(100);unclassified(100);unclassified(100);unclassified(100);unclassified(100);
Otu0060	4	16	13	0	0	0	0	0	0	0	M03053_189_000000000-D2L8J_1_1101_19347_14434	ATAAGTAATGCGAATTGCAGAATTCAGCGAGTCATTGAATTTTTGAACGCACATTGCGCCCTGTGGTATTCCGCAGGGCATGCCTGTTCGAGCGTCAGTACAACCCTCAAGCTTAGCTTGGTCTTGAGCCCCGCCAGTAACTCGGCAGGCTTTAAAACTAGTGGCGGCGCCATTAAGGCTCTTAGCGTAGTAATATCTCTCGCTATTGAGACCCTGTGGTATGCTAGCCAGTAACCCCAACTTTCTAAGTTTGACCTCGGATCAGGTAGGGATACCCGCTGAACTTA	k__Fungi(100);p__Ascomycota(100);c__Pezizomycotina_cls_Incertae_sedis(100);o__Pezizomycotina_ord_Incertae_sedis(100);f__Pezizomycotina_fam_Incertae_sedis(100);g__Chalara(100);s__Chalara_sp(100);
Otu0061	0	0	33	0	0	0	0	0	0	0	M03053_189_000000000-D2L8J_1_1101_17194_8573	ATAAGTAATGCGAATTGCAGAATTCCAGTGAGTCATCGAATCTTTGAACGCACATTGCGCCCTTTGGTATTCCGAAGGGCATGCCTGTTCGAGCGTCATTATCACCCCTCAAGCCCCTCGGCTTGGTGTTGGACGGTTTGGCGGAGACCACGTCTCCACCCCTCCCAAAGACAATGACGGCGGCCTCGTTGGACCCCCGGTACACTGAGTTCTTCACGGGACACGTACTGGACACAAGGGTGCGCGGGGCCCGGTCTGACCTCCCCATCAAGGGAGAACTTTTTACAAGGTTGACCTCGGATCAGGTAGGGATACCCGCTGAACTTA	k__Fungi(100);p__Ascomycota(100);c__Pezizomycotina_cls_Incertae_sedis(100);o__Pezizomycotina_ord_Incertae_sedis(100);f__Pezizomycotina_fam_Incertae_sedis(100);g__Veronaea(100);unclassified(100);
Otu0062	22	2	7	0	0	0	0	0	0	0	M03053_189_000000000-D2L8J_1_1101_22616_6521	ATAAGTAATGCGAATTGCAGAATCCGTGAGTCATCGAATCTTTGAACGCACATTGCGCCCTCTGGTATTCCGGAGGGCATGCCTGTTCGAGCGTCATTATCACCCCTCAAGCCCGGCTTGTTGTTGGACGCAGCGCTTATCCCGCTCCTCCCAAAGATAATGACGGCGTCTGCGACGGCTCCTGTACACTGAGCTTTCGGGCACGTACACGGCTAGAAGTCCAGACCCGGTCGCCGTCCCCCCCACGGGACACCCATTACCACAAGGTTGACCTCGGATCAGGTAGGAATACCCGCTGAACTTA	k__Fungi(100);p__Ascomycota(100);c__Eurotiomycetes(100);o__Chaetothyriales(100);f__Chaetothyriaceae(100);g__Cyphellophora(100);unclassified(100);
Otu0063	12	15	0	3	0	0	0	0	0	0	M03053_189_000000000-D2L8J_1_1101_15249_13213	ATAAGTAATGTGAATTGCAGAATTCAGTGAATCATCGAATCTTTGAACGCACATTGCGCCCGCCAGTATTCTGGCGGGCATGCCTGTCTGAGCGTCATTTCAACCCTCATGCCCCTAGGGCGTGGTGTTGGGGATCGGCCAAAGCCCGCGAGGGACGGCCGGCCCCTAAATCTAGTGGCGGACCCGTCGTGGCCTCCTCTGCGAAGTAGTGATATTCCGCATCGGAGAGCGACGAGCCCCTGCCGTTAAACCCCCAACTTTCCAAGGTTGACCTCAGATCAGGTAGGAATACCCGCTGAACTTA	k__Fungi(100);p__Ascomycota(100);c__Sordariomycetes(100);o__Hypocreales(100);f__Bionectriaceae(100);g__Clonostachys(100);s__Clonostachys_rosea(100);
Otu0064	12	14	0	3	0	0	0	0	0	0	M03053_189_000000000-D2L8J_1_1101_13110_8435	ATACGTAGTGTGAATTGCAGAATTCCGTGAACCATCGAATCTTTGAACGCATATTGCGCCCAAGACCTCGGTCGAGGGCATGTCTGCCTCAGCGTCGGTATAAACCCATCGCTTCCCTCCCTTGTTAAATCAAGGGGGTCGGCCCATCATTTGCTGGTGGGCTTGGAAGCGGATGTGGCTTTCCCACGCTTCGTGCGTGGGTTGGCTGAAAAGCAGAGGCTAGAGCTAGGACCCGATAAGGGCTCAACTGGATAGGTAGACCTAGTGCCTAACGGCGCTTCCTACACGAAGTTGTGCCTGTGGTCCTCGGCTGGCGGCCAGCAGGAAACGAGCGTGTGTGCGTGTTGGAGCTTCTGCTTCCACCGCCTCCGCCGTCTTACCATTCGACCTGAGCTCAGG…	k__Fungi(100);unclassified(100);unclassified(100);unclassified(100);unclassified(100);unclassified(100);unclassified(100);
Otu0065	1	27	0	1	0	0	0	0	0	0	M03053_189_000000000-D2L8J_1_1101_22441_17236	ATACGTAGTGTGAATTGCAGAATTCCGCGAATCATCGAGTCTTTGAACGCAAGTTGCGCCCGAGGCTTGACCAAGGGCATCTCTGCCAGAGCGTCACCGCGACACCCACCGGTCCACTCCTCCCCCTTCCTTCGTCGGAAAAGGGAGCGAGGTGGGCCGAGTGAAACTGGCCGTCCGAACCCCGATAGAAAAAGGGTTGGGTCGGCTGAAATGGAGGGAATTTGGCCGCCGTGGCGACACAGCCCCCGCGATCAGGTGATCCAAGGCCCCCACCCCGGGTGGCCCTGGAACTCGAACGTGCGTGGGCCTGTGCCGCCCGGCCCGATGTGTTCCAAAGCAGGTCCCGCTCCGCTCCGCGGAGCGACGAACGTCACGCATCAGACCTCTGATCAGAGAAGA…	k__Fungi(100);unclassified(100);unclassified(100);unclassified(100);unclassified(100);unclassified(100);unclassified(100);
Otu0066	11	18	0	0	0	0	0	0	0	0	M03053_189_000000000-D2L8J_1_1101_26623_19326	ATAAGTAATGCGAATTGCAGAATTCAGTGAGTCATCGAATCTTTGAACGCACATTGCGCCCTGTGGTATTCCGCAGGGCATGCCTGTTCGAGCGTCATTTCAACCCTCAAGCTCTGCTTGGTGTTGGGCCCTGCCCGCTCGCGGCCGGCCCTAAAGACAGTGGCGGCGCCGTCTGGCTCTGAGCGTAGTACATCTCTCGCTCCAGTGCCTGGCGGTGGCCTGCCAGAACCCCAACTCTGTGGTTGACCTCGGATCAGGTAGGGATACCCGCTGAACTTA	k__Fungi(100);p__Ascomycota(100);c__Leotiomycetes(100);o__Leotiomycetes_ord_Incertae_sedis(100);f__Myxotrichaceae(100);g__Oidiodendron(100);unclassified(100);
Otu0067	1	24	0	0	0	0	0	1	0	3	M03053_189_000000000-D2L8J_1_1101_23829_9822	ATAAGTAATGTGAATTGCAGAATCCAGTGAATCATCGAATCTTTGAACGCAACTTGCGCCCTCTGGTATTCCGGAGGGCATGCCTGTTTGAGTGTCGTGAACACCTCAACCCTCCAATGTTTTTGCATCGGAGGTGTTGGTAGTGAGCGCTGCCGGACTTTGGGTCGGCTCGCTTTAAAATCATTAGCTGGATCCATTCTGACCTGGTTCTACTCGGCGTAATAAGTTATTATCGTCGAGGACGCTTGTCTTTCTAGGCAGGCGGCCACAGTAAGGGTGTTTGAACCGCTTCCAACACGTCTTGCTCTTGTAGCAAACACTTGAACCTCTGACCTCAAATCAGGCAGGACTACCCGCTGAACTTA	k__Fungi(100);p__Basidiomycota(100);c__Wallemiomycetes(100);o__Geminibasidiales(100);f__Geminibasidiaceae(100);g__Geminibasidium(100);s__Geminibasidium_sp(100);
Otu0068	19	9	0	0	0	0	0	0	0	0	M03053_189_000000000-D2L8J_1_1101_10553_3020	ATAAGTAATGTGAATTGCAGAATTCAGTGAATCATCGAATCTTTGAACGCACCTTGCGCCCTTTGGTTATTCCGAAGGGCATGCCTGTTTGAGTATCATGAACACCTCAACTCTCATGGTTCGCCATGCTGGGTTTGGACTCTGGGGGTCTTGCTGGCTTACGGTAGTCGGCTCCTCTCAAATAGATCAGCTTGCCAGTGTTTGGTGGTGATGCAGGTGTGATAACTATCTACGCTTGTGGCTCCCCACCAGGTAACTTTCGGTGATGGAAGTTCGCTGGAGCTAATAAATGTCTCTCCTCGGTGGAGACAGCTCTTTGAATGTTTGATCTCAAATCAGGTAGGACTACCCGCTGAACTTA	k__Fungi(100);p__Basidiomycota(100);c__Agaricomycetes(100);o__Thelephorales(100);f__Thelephoraceae(100);unclassified(100);unclassified(100);
Otu0069	0	0	0	0	0	8	19	0	0	0	M03053_189_000000000-D2L8J_1_1101_21986_16793	ATACGTAATGCGAATTGCAGAATTCAGTGAATCATCAAATCTTTGAACGCAAATTGCACTCTCGGGATAGGCCTGGGAGTACGCCTCTTTGACTATCGATTCCATCACTCAACAACTTCTTGTTGTTGGATACTGGACCAACATTGCGATCAGCAATGCGGTCTTAAACACATGGAGTTTAAGCTGTCTTGAGAGCTTCGCCTCGGCGAATAGTCCAATCGGACTTGCAAACCAAGTTGCCTGTAGTGACGAAGGTAATTTCGCAATGCGAATCCTCCAACGTGACTACGTGGTGCCTTGGGACTTGTCGGTTGAATGAACGCTCAAGTAGCAATAAGAAACGATGTTCGAGGCTTCAAAACCTCAACAACTTTGAATTAGATGTCAAATGAAGCGAGA…	k__Fungi(100);p__unclassified_Fungi(100);c__unclassified_Fungi(100);o__unclassified_Fungi(100);f__unclassified_Fungi(100);g__unclassified_Fungi(100);s__Fungi_sp(100);
Otu0071	2	11	11	0	0	0	0	0	1	0	M03053_189_000000000-D2L8J_1_1101_10751_11120	ATACGTAGTGTGAATTGCAGAATTCCGTGAATCATCGAATCTTTGAACGCATATGGCGCTCGAGGCTTCGGCCAAGAGCATGTCTGCCTCAGCGTCGGGTTAATATCACACCCACATACCCTGTGTATGTGATTCCGTGTGGACCTGGCCGTTCCAGTTCAGTGCTCGACCACCTTTACTGGTGATCGAATCAGTCACCCTGGATCGGCTGAAGAGCAGAGGCTAACTCTGGACCCGCTAAGGGCCGCAATTGAGTAGGCACTTGTTGCTAATACTTTAATTGTTGGTCTGGGACTAGTGTTCGGCCCTAACCAGGAAAATTAACCTTATTGTCTCGACCTGAGCTCAGGCAAGAACACCCGCTGAACTTA	k__Fungi(100);unclassified(100);unclassified(100);unclassified(100);unclassified(100);unclassified(100);unclassified(100);
Otu0072	16	8	0	0	0	0	0	0	0	1	M03053_189_000000000-D2L8J_1_1101_22821_10228	ATACGTAATGTGAATTGCAGAATTCAGTGAATCATCGAGTCTTTGAACGCACATTGCGCCCCCTGGTATTCCGGGGGGCATGCCTGTCCGAGCGTCATTGCTGCCCTCAAGCCCGGCTTGTGTGTTGGGTCTCGTCCCTCTTCCCGGGGGGACGGGCCCGAAAGGCAGCGGCGGCACCGCGTCCGGTCCTCGAGCGTATGGGGCTTTGTCACCCGCTCTGTAGGCCCGGCCGGCGCTTGCCGATCAACCAAAACTTTTTTCCAGGTTGACCTCGGATCAGGTAGGGATACCCGCTGAACTTA	k__Fungi(100);p__Ascomycota(100);c__Eurotiomycetes(100);o__Eurotiales(100);f__Trichocomaceae(100);g__Penicillium(100);unclassified(100);
Otu0073	18	0	6	0	0	0	0	0	1	0	M03053_189_000000000-D2L8J_1_1101_11309_6537	ATAAGTAATGTGAATTGCAGAATTCAGTGAATCATCGAATCTTTGAACGCACATTGCGCCCGCCAGTATTCTGGCGGGCATGCCTGTTCGAGCGTCATTTCAACCCTCAAGCCCCCGGGCTTGGTGTTGGGGATCGGCGAGCCTCTGCGCCCGCCGTCCCCTAAATTTAGTGGCGGTCACGTTGTAACTTCCTCTGCGTAGTAGCACACTTAGCACTGGGAAACAGCGCGGCCACGCCGTAAAACCCCCAACTTTAGAATGTTTGACCTCGAATCAGGTAGGACTACCCGCTGAACTTA	k__Fungi(100);p__Ascomycota(100);c__Sordariomycetes(100);o__Hypocreales(100);f__Nectriaceae(100);g__Dactylonectria(100);s__Dactylonectria_anthuriicola(100);
Otu0074	1	0	21	0	0	0	0	0	0	0	M03053_189_000000000-D2L8J_1_1101_17597_6425	ATAAGTAATGTGAATTGCAGAATTCAGTGAATCATCGAATCTTTGAACGCACCTTGCGCCCTTTGGCCATTCCGAAGGGCATGCCTGTTTGAGTATCATGAACACCTCAACTCTTTATGGTTTTCCATGATGAGCTTGGACTTTGGGGGTTTTGCTGGCCTATGGGTTGGCTCCTCTAAAATGAATCAGCTTACCAGTGTTTTGGTGGGTATCATGGGTGTGATAACTATCTACGCTTGTGGTTTTTCCACCAGGTAACCTTCAGCAGTGGAGGTTCGCTGGAGCTCATAGATGCGTCTCTCCTCAGTGAGGACGGCCCTTTGAATGTTTGATCTCAAATCAGGTAGGACTACCCGCTGAACTTA	k__Fungi(100);p__Basidiomycota(100);c__Agaricomycetes(100);o__Thelephorales(100);f__Thelephoraceae(100);g__Tomentella(100);unclassified(78);
Otu0075	0	20	2	0	0	0	0	0	0	0	M03053_189_000000000-D2L8J_1_1101_18617_7198	ATAAGTAATGCGAATTGCAGAATTCCAGTGAGTCATCGAATCTTTGAACGCACATTGCGCCCTTTGGTATTCCGAAGGGCATGCCTGTTCGAGCGTCATTATCACCCCTCAAGCCTTCCGGCTTGGTGTTGGACGGTTTGGTGGCAGAGCCTTCGGGCGGCGGTCACCCCTCCCAAAGACAATGACGGCGGCCTCGTTGGACCCCCGGTACACTGAGTTCCTCACCGAACACGTACCGGATCAAGGGCCCGCGGAGCACGGTCTGCCTCCCCTCAGGGAGAACTTTTTTCTCAAGGTTGACCTCGGATCAGGTAGGAATACCCGCTGAACTTA	k__Fungi(100);p__Ascomycota(100);unclassified(100);unclassified(100);unclassified(100);unclassified(100);unclassified(100);
Otu0076	19	2	0	0	0	0	0	0	0	0	M03053_189_000000000-D2L8J_1_1101_16758_5848	ATAAGTAATGTGAATTGCAGAATTCAGTGAATCATCGAATCTTTGAACGCACATTGCGCCCCTTGGTATTCCGAGGGGCATGCCTGTTCGAGCGTCATTTCAACCCTCAAGCACAGCTTGGTCTTGGGCTTCGCCGCTAACCCGGCGGGTCTTAAAATCAGTGGCGGTGCCGTCGGGCCCTGAGCGCAGTAATTTCTCTCGCTATAGGGTCCCGGCGGATGCTGGCCAGTAACCCCCAATTTTCTATGGTTGACCTCGGATCAGGTAGGGATACCCGCTGAACTTA	k__Fungi(100);p__Ascomycota(100);c__Leotiomycetes(100);o__Helotiales(100);unclassified(100);unclassified(100);unclassified(100);
Otu0077	0	0	21	0	0	0	0	0	0	0	M03053_189_000000000-D2L8J_1_1101_21760_10719	ATAAGTAATGTGAATTGCAGAATTCAGTGAATCATCGAATCTTTGAACGCACCTTGCGCTCTCTGGTATTCCGGAGAGCATGCCTGTTTGAGTGTCATGAACTCTTCAACCCACCGGTTCCTTGTTGAACTGCTGTGGTGTTTGGATTTTGAACGCTGCTATGTAATTAGCTCGCTCGTAATACATTAGCATCTCAATTTCGTAATCGGATTGACTCAGCGTAATAGACTATTCGCTGAGGACACTTTTTCAGAGTGGCCGAGACATGAAAAGTTAGAAGCTTCAAACCCATCTAGTCATTCTTAAGATTAGACCTCAGATCAGGCAGGATTACCCGCTGAACTTA	k__Fungi(100);p__Basidiomycota(100);c__Microbotryomycetes(100);unclassified(100);unclassified(100);unclassified(100);unclassified(100);
Otu0078	1	0	20	0	0	0	0	0	0	0	M03053_189_000000000-D2L8J_1_1102_15817_13086	ATAAGTAATGTGAATTGCAGAATTCCGTGAATCATCGAATCTTTGAACGCACATTGCGCCCCCTGGTATTCCGGGGGGCATGCCTGTCCGAGCGTCATTGCAACCCTCAAGCACGGCTTGTGTTATGGGCCCTCGTCCCGCTATTCTAGTGGACGTGCCCGAAATGCAGTGATCGCCGCCGCGACTCCGGCGCCCGAGCGAATGGGAATTTAACCACCGCTCAGTGGGCCCGGCCGGTGGCTTCGGTCTCAAACCACAATTTTCTAAGGTTGACCTCGGATCAGGTAGGGATACCCGCTGAACTTA	k__Fungi(100);p__Ascomycota(100);c__Pezizomycotina_cls_Incertae_sedis(100);o__Pezizomycotina_ord_Incertae_sedis(100);f__Pezizomycotina_fam_Incertae_sedis(100);g__Myriodontium(100);unclassified(100);
Otu0079	0	1	19	0	0	0	0	0	0	0	M03053_189_000000000-D2L8J_1_1102_8369_15521	ATACGTAATGTGAATTGCAGAATTCAGTGAATCATCGAATCTTTGAACGCACATTGCGCCCGCTAGTATTCTGGCGGGCATGCCTGTTCGAGCGTCATTTCAACCATCAAGCCCTAGGCTTGTGTTGGAGCCCTGCGGCTGCCCGCAGCCTCCTAAAATTAGTGGCGGGCTCGCTATCACACCGAGTGCAGTAGTTTTCTCTTCGCTCTGGACGTGTAGCGGGTTCTGGCCGTGAAACCCCCTAAATTTTCAAGGTTGACCTCGGATCAGGTAGGAATACCCGCTGAACTTA	k__Fungi(100);p__Ascomycota(100);c__Sordariomycetes(100);o__Sordariales(100);f__Lasiosphaeriaceae(100);unclassified(100);unclassified(100);
Otu0080	1	11	8	0	0	0	0	0	0	0	M03053_189_000000000-D2L8J_1_1101_28653_17762	ATAAGTAATGTGAATTGCAGAATTCAGTGAATCATCGAATCTTTGAACGCACATTGCGCCCTCCGGTATTCCGGAGGGCATGCCTGTTCGAGCGTCATTTCAACCCTCAAGCACTGCTTGGTGTTGGGGCACTGCTCCTCTCGCGGGGAGCAGGCCCTGAAATTCAGTGGCGAGCTCGCCAGGACCCCGAGCGCAGTAGTTAAACCCTCGCTCTGGAAGGCCCTGGCGGTGCCCTGCCGTTAAACCCCCAACTCTTGAAAATTTGACCTCGGATCAGGTAGGAATACCCGCTGAACTTA	k__Fungi(100);p__Ascomycota(100);c__Sordariomycetes(100);o__Diaporthales(100);f__Diaporthaceae(100);unclassified(100);unclassified(100);
Otu0081	6	4	0	10	0	0	0	0	0	0	M03053_189_000000000-D2L8J_1_1101_21073_6362	ATAAGTAGTGTGAATTGCAGAATTCAGTGAATCATCGAATCTTTGAACGCACATTGCGCCCCTTGGTATTCCATGGGGCATGCCTGTTCGAGCGTCATTTGTACCCTCAAGCTTTGCTTGGTGTTGGGTGTTTGTCCCGCGCTCTTTTGCGCAAGACTCGCCTTAAATCAATTGGCAGCCGGCATGTTAGCCTGGAGCGCAGCACATTTTGCGCCCCTTGCTTGCTTGTGTTGGCCCCCATCAAGTCCATATATTTGCTCTTGACCTCGGATCAGGTAGGGATACCCGCTGAACTTA	k__Fungi(100);p__Ascomycota(100);c__Dothideomycetes(100);o__Pleosporales(100);f__Leptosphaeriaceae(100);g__Leptosphaeria(100);s__Leptosphaeria_sclerotioides(100);
Otu0082	12	7	0	0	0	0	0	0	0	0	M03053_189_000000000-D2L8J_1_1101_19372_12828	ATAACTAATGTGAATTGCAGAATTCAGTGAATCATCGAGTCTTTGAACGCACATTGCGCCCTCTGGTATTCCGGAGGGCATGCCTGTCCGAGCGTCATTGCTGCCCTCCAGCCCGGCTGGTGTGTTGGGCCCCGCCCCCCTTCCCGGGGGGGCGGGCCCGAAAGGCAGCGGCGGCACCGCGTCCGGTCCTCGAGCGTATGGGGCTTTGTCACCCGCTCTTGCAGGCCCGGCCGGCGCCAGCCGACCCCCTCAATCTATTTTTTCAGGTTGACCTCGGATCAGGTAGGGATACCCGCTGAACTTA	k__Fungi(100);p__Ascomycota(100);c__Eurotiomycetes(100);o__Eurotiales(100);f__Trichocomaceae(100);g__Penicillium(100);unclassified(100);
Otu0083	0	0	18	0	0	0	0	0	0	0	M03053_189_000000000-D2L8J_1_1101_20397_6705	ATAAGTAATGTGAATTGCAGAATTCAGTGAATCATCGAATCTTTGAACGCACATTGCGCCCGCCAGTATTCTGGCGGGCATGCCTGTCCGAGCGTCATTTCAACCCTCGAACCCCTCCGGGGGGTCGGCGTTGGGGATCGGCCTTCTACCGGCCGGCCCCGAAATACAGTGGCGGTCTCGCCGCAGCCTCTCCTGCGCAGTAGTTTGCACACTCGCACCGGGAGCGCGGCGCGTCCACGTCCGTAAAACACCCAACTTTCTGAAATGTTGACCTCGGATCAGGTAGGAATACCCGCTGAACTTA	k__Fungi(100);p__Ascomycota(100);c__Sordariomycetes(100);o__Hypocreales(100);f__Hypocreaceae(100);g__Trichoderma(100);unclassified(100);
Otu0084	3	15	0	0	0	0	0	0	0	0	M03053_189_000000000-D2L8J_1_1101_20054_5841	ATACGTAATGTGAATTGCAGAATTCAGTGAATCATCGAGTCTTTGAACGCACATTGCGCCCTCTGGTATTCCGGAGGGCATGCCTGTCCGAGCGTCATTGCTGCCCTCAAGCACGGCTTGTGTGTTAGGCCCCGTCCTCCGCTCGCGGGGGACGGGCCTGAAAGGCAGCGGCGGCACCGCGTCCGGTCCTCGAGCGTATGGGGCTTTGTCACCCGCTCTGTAGGCCCGGCCGGCGCCTGCCGATCAACCACACTTTTATTCAGGTTGACCTCGGATCAGGTAGGGATACCCGCTGAACTTA	k__Fungi(100);p__Ascomycota(100);c__Eurotiomycetes(100);o__Eurotiales(100);f__Trichocomaceae(100);g__Penicillium(100);s__Penicillium_nilense(100);
Otu0085	0	17	0	0	0	0	0	0	0	0	M03053_189_000000000-D2L8J_1_1101_12503_5084	ATAAGTAATGTGAATTGCAGAATTCAGTGAATCATCGAATCTTTGAACGCACATTGCGCCCTTTGGTATTCCGAGGGGCATGCCTGTTCGAGCGTCATTACACACCTCAAGCTCTGCTTGGTATTGGGTCCTCGTCCCGCGCGGACGTGCCCGAAACTCGTCGGCGGTGGTGCCTGGCTTCGAGCGTAGTTATAACTTCGTTCGCTCTGGAGTCCTAGGTCCCGCCCGCCGGATAAACCCTTTTCTCAAGGTTTGACCTCGGATCAGGTAGGGATACCCGCTGAACTTA	k__Fungi(100);p__Ascomycota(100);c__Dothideomycetes(100);unclassified(100);unclassified(100);unclassified(100);unclassified(100);
Otu0086	0	0	16	0	0	0	0	1	0	0	M03053_189_000000000-D2L8J_1_1101_20885_5492	ATAAGTAATGTGAATTGCAGAATTCAGTGAATCATCGAATCTTTGAACGCATCTTGCGCTCCTTGGTATTCCAAGGAGCATGCCTGTTTGAGTATCATCAAATTCCTCAACTGCACCTAGTCAATGGGTGTGGCTTGGATACTGGGGGTTGCTGGCTTTTCAGAAACTGGCTCCTCTGAAATGCATTAGTGGCAGAGAGAAAGGACCACTACAGGGTGTGATTAACTATCTACATCTTTTGGTATTCTGTTATGCTGCTTCATTGTGGGCACATTTTGACAAGTTTGATCTCAAATCAGGCAGGACTACCCGCTGAACTTA	k__Fungi(100);p__Basidiomycota(100);c__Agaricomycetes(100);o__Agaricales(100);f__Inocybaceae(100);g__Inocybe(100);s__Inocybe_caroticolor(100);
Otu0087	10	7	0	0	0	0	0	0	0	0	M03053_189_000000000-D2L8J_1_1101_17014_7862	ATAAGTAATGCGAATTGCAGAATCCGTGAGTCATCGAATCTTTGAACGCACATTGCGCCCCTTGGTTATTCCGAAGGGCATGCCTGTTCGAGCGTCATTATCACCCCTCAAGCCCCTGGCTTGGTGTTGGACTTTAGTTGTGGCTTTGCCTATCAACTGGTCTCAAAGATAGTGACGGCGCCCCAGAGGGAACCGGGTACGAGGAGCTTTTTACTAAGCATGTATCTGGGACGACTCTGATGGGCGACGGTCTTGTTATACTTTTACCTAAGTGTTGACCTCGGATCAGGTAGGAATACCCGCTGAACTTA	k__Fungi(100);p__Ascomycota(100);unclassified(100);unclassified(100);unclassified(100);unclassified(100);unclassified(100);
Otu0088	0	0	17	0	0	0	0	0	0	0	M03053_189_000000000-D2L8J_1_1101_5974_7250	ATAAGTAATGTGAATTGCAGAATTCAGCGAATCATCGAATCTTTGAACGCACATTGCGCCCGCCAGTTATGCTGGCAGGCATGCCTGTTCGAGCATCTTCTCAACCACTCAAGCCCGCTGTGCTTGGTGTTGGGGCGCTGCGGGGAGACCCGCAGGCCCTCAAAACCAGTGGCGGGCTCGCCGAGACTCCGGGCGTAGTAGTTTTCCTCTCGCCCAGGGCGCCTCGGCGGGCCTCCAGCCGTTTAAACCCCCAAACTTCAGAAGGTTGATCTCGGATCAGGTAGGAATACCCGCTGAACTTA	k__Fungi(100);p__Ascomycota(100);unclassified(100);unclassified(100);unclassified(100);unclassified(100);unclassified(100);
Otu0089	0	16	0	0	0	0	0	0	0	0	M03053_189_000000000-D2L8J_1_1101_17813_6496	ATAAGTAATGTGAATTGCAGAATTCAGTGAATCATCGAATCTTTGAACGCACCTTGCGCCCTTTGGCTATTCCGAAGGGCATGCCTGTTTGAGTATCATGAACACCTCAACTCTCATGGCTTGCCATGATGAGCTTGGACTTATGGGGGTCTTGCTGGCCTGTGGTCGGCTCCTCTCAAACGAATCAGCTTGCCAGTGTTTGGTGGCGTCACAGGTGTGATAACTATCTACGCTTGTGGTTTCCCGCCAGGTAACCTTCAGCAATGGAGATTCACTGGGGCTCATAAAAGTCTCTCCTCGGTGAGGACAGCTCTTTGAACGTTTGATCTCAAATCAGGTAGGACTACCCGCTGAACTTA	k__Fungi(100);p__Basidiomycota(100);c__Agaricomycetes(100);o__Thelephorales(100);f__Thelephoraceae(100);g__Tomentella(100);unclassified(100);
Otu0090	13	3	0	0	0	0	0	0	0	0	M03053_189_000000000-D2L8J_1_1101_20571_7915	ATAAGTAATGTGAATTGCAGAATTCAGTGAATCATCGAATCTTTGAACGCACATTGCGCCCGCCAGTATTCTGGCGGGCATGCCTGTTCGAGCGTCATTTCAACCCTCAAGCCCCCGGGCTTGGTGTTGGGGATCGGCCACCGCCTCGCGCGAGCGTGGCAGGCCGTCCCCGAAATACAGTGGCGGTCACGCCGCAGCATCCTCTGCGTAGTAGCACAGCCTCGCACCGGATCGCGGCGCGGCCACGCCGTAAAACCCCCACTCTGAAGTTTGACCTCGGATCAGGTAGGAATACCCGCTGAACTTA	k__Fungi(100);p__Ascomycota(100);unclassified(100);unclassified(100);unclassified(100);unclassified(100);unclassified(100);
Otu0091	0	0	16	0	0	0	0	0	0	0	M03053_189_000000000-D2L8J_1_1101_29167_13314	ATACGCAATGCGAATTGCAGAAACCCGCGAGTCATCAGATCTTTGAACGCAAGTGGCGCTGGCCGTCAAACAGCCAGCATGCCTGTCTCAGTGTGTTAGGAATCACACATCCCAATGCGATTGACGGGACGGCCGCTCTGCGACCGGCCCTTCTCTCGTTAAACACGGCGGCGCCGAGCCTCTTGCGCGGCCGAAATGAAGTAGTCACTTCCTTGCGAAAGTGATCTCGTTTCGGATACCGGCGGGCTCACACTCAAGGCGTTCCGCGCTAAAATTACTTACCTCCACCTGCACCTGAGATCAAGCAAGACCACCCGCTGAACTTA	k__Fungi(100);unclassified(100);unclassified(100);unclassified(100);unclassified(100);unclassified(100);unclassified(100);
Otu0092	2	14	0	0	0	0	0	0	0	0	M03053_189_000000000-D2L8J_1_1101_27575_8054	ATAAGTAATGCGAATTGCAGAATTCAGTGAATCATCGAGTTTTTGAACGCACATTGCGCCCGCCAGCATCCTGGCGGGCATGCCTGTTCGAGCGTCATTTCCACCCTCAGGCTCTGCCTGGTGTTGGGGGCCTGCGCCCGCAGCCCCTCAAAGACAGCGGCGGTCCCGGCCCCGGCCCCGAGCGTAGTAATACACGTCGCTCCGGGTGCCGGGCGGGCCCCAGCCGTAAGCCTTTATTTTTAACAGGTTGACCTCGGATCAGGTAGGAATACCCGCTGAACTTA	k__Fungi(100);p__Ascomycota(100);c__Sordariomycetes(100);o__Chaetosphaeriales(100);f__Chaetosphaeriaceae(100);g__Chaetosphaeria(100);s__Chaetosphaeria_myriocarpa(100);
Otu0093	7	9	0	0	0	0	0	0	0	0	M03053_189_000000000-D2L8J_1_1101_22863_7053	ATAACTAATGTGAATTGCAGAATTCAGTGAATCATCGAGTCTTTGAACGCACATTGCGCCCCCTGGTATTCCGGGGGGCATGCCTGTCCGAGCGTCATTGCTGCCCTCAAGCACGGCTTGTGTGTTGGGCTCCGTCCCCCCGGGGACGGGCCCGAAAGGCAGCGGCGGCACCGAGTCCGGTCCTCGAGCGTATGGGGCTTTGTCACCCGCTCTGTAGGCCCGGCCGGCGCCAGCCGACAACCCATCATCCTTTTCAGGTTGACCTCGGATCAGGTAGGGATACCCGCTGAACTTA	k__Fungi(100);p__Ascomycota(100);c__Eurotiomycetes(100);o__Eurotiales(100);f__Trichocomaceae(100);g__Penicillium(100);s__Penicillium_spinulosum(100);
Otu0094	14	2	0	0	0	0	0	0	0	0	M03053_189_000000000-D2L8J_1_1101_20286_11149	ATAACTAATGTGAATTGCAGAATTCAGTGAATCATCGAGTCTTTGAACGCACATTGCGCCCCCTGGTATTCCGGGGGGCATGCCTGTCCGAGCGTCATTGCTGCCCTCAAGCCCGGCTTGTGTGTTGGGTCCTCGTCCTCCCCTCGCGGGGGGACGGGCCCGAAAGGCAGCGGCGGCACCGCGTCCGGTCCTCGAGCGTATGGGGCTTTGTCACCCGCTCTGTAGGCCCGGCCGGCGCCAGCCGACGCAAATCACCTTTTTTTTCAGGTTGACCTCGGATCAGGTAGGGATACCCGCTGAACTTA	k__Fungi(100);p__Ascomycota(100);c__Eurotiomycetes(100);o__Eurotiales(100);f__Trichocomaceae(100);g__Aspergillus(100);unclassified(100);
Otu0095	0	2	0	0	0	0	9	5	0	0	M03053_189_000000000-D2L8J_1_1101_24363_4893	CTCCGTCCTTTTCCTTTCCTCCTTCCTTTCCTCCTCTCCTCTTTTCCCTCCTCTTGCTCTCTCTTTTCTTCCTTCGCTCCTTCTTGTTTTCTTCTCCGTCAACCCCTCAACTCCCTTTCTTCTTGACCTGGCGCTGGCCTTGCGTGATCCCACCGCTTTATTCATAAAGCGGCGGGTTACTTGAAATGCAGGTGCAGCTGGACTTTTCTCTGAGCTATAAGCATATCTATTTAGTCTGCCTCAAAACAGATTATTACCTTTGCTGCAGCTAACATAAAGGAGATTAGTTCTTGTGCTGACTGATGCAGGATTCACAAAGACCGCGGCGGCTGGCGGGGGAAAAGCGAGCGCAAAGCAAGGAAGACTACCCGCGGAACTTA	k__Fungi(100);p__Zygomycota(100);c__Mortierellomycotina_cls_Incertae_sedis(100);o__Mortierellales(100);f__Mortierellaceae(100);g__Mortierella(100);s__Mortierella_antarctica(100);
Otu0096	0	7	8	0	0	0	0	0	0	0	M03053_189_000000000-D2L8J_1_1101_12700_5670	ATACGTAGTGTGAATTGCAGAAAACCGTGAACCATCGAATCTTTGAACGCATATTGCGCTCGAGGCTTCGGCCAAGAGCATGTCTGCCTCAGCGTCGGGTTAACATCGCTATACCAACAAACATTTATGCTTGTTGTCACAGCGGATCTGGCTTTCCCAGGTGTGGGTTATTTATAGCTCTGTCACCTGGGTCTGCTGAAGAACAGAGGTTGATGCATGGACCCGTTTACGGGCCGCAGTTGGGTAGGCAGCTTCATGCTTGCTATCAATATCTTACTGTTGGCTTGGGTGTATGCGCGCAGCCCTCAAACCAGGAACTGTGCGCGCTCCTCACCGAGCGCGTGCTTCTTTTGTTCTCGACCTGAGCTCAGGCAAGATTACCCGCTGAACTTA	k__Fungi(100);unclassified(100);unclassified(100);unclassified(100);unclassified(100);unclassified(100);unclassified(100);
Otu0097	8	7	0	0	0	0	0	0	0	0	M03053_189_000000000-D2L8J_1_1101_23399_13859	ATAAGTAGTGTGAATTGCAGAATTCAGTGAATCATCGAATTTTTGAACGCACATTGCGCCCCTTGGTATCCCGAGGGGCATGCCTGTTCGAGCGTCATTTCAACCTCTCAAGCTTTGCTTGGTATTGGGCTTCATTCCATCCTTTTTATTAAGGCGGCAATGTGCCTTAAATGTAGGCAGCGGCAAGTATTAGTTCCGAGCGTAGCAGTTAAAACATTTCGCTCTAGGAGTCTGGATACATTGTCAGCTATACATAATAAAACTACTATTTTGACCTCGGATCAGGTAGGGATACCCGCTGAACTTA	k__Fungi(100);p__Ascomycota(100);c__Dothideomycetes(100);unclassified(100);unclassified(100);unclassified(100);unclassified(100);
Otu0098	4	11	0	0	0	0	0	0	0	0	M03053_189_000000000-D2L8J_1_1101_18041_11007	ATACGTAGTGTGAATTGCAGAATTCCGTGAACCATCGAATCTTTGAACGCATATTGCGCTCAAGCCCTCGGGCAAGAGCATGTCTGCCTCAGCGTCGGTTTACACCCTCACCCCTCCCAACTTGTTGGGTGTGCTTGCTTTATTGGCAAGCCGTTGGGGTGGATCTGGCTTCCCCAATCAGCCATCAGGCAGATTGGGTTGGCTGAAGTGCAGAGGCTTAAGCAAGGACCCGATATGGGCTTCAACTGGATAGGTAGCACCGGCTTCTGCCGACTACACGAAGTTGTTGCTTGTGGCTCTTGCTAGAGGCCAAGCAGGAACGTGCCTTTGGCATGTCTAAACTTTCGACCTGAGCTCAGGCAAGATTACCCGCTGAACTTA	k__Fungi(100);unclassified(100);unclassified(100);unclassified(100);unclassified(100);unclassified(100);unclassified(100);
Otu0099	0	0	0	0	0	0	15	0	0	0	M03053_189_000000000-D2L8J_1_1101_26841_12199	ATACGTAATGCGAATTGCAGAACTCAGTGAATCATCCAATCTTTGAACGCAAATGGCACTCTCTGGAAACACCAGCCGGAGAGTATGCCTCCTTGAGTGTCGCGTATGATCGATGTGATCGCGCCAAGCGCCGGTGTGCACTTCGGTGTTCACGGGCGAGAGTGAGTCGTTGGCTGGCATTTGGTTGTCGCCCATCACTCGAAATGCATGACTGCTGACTGCGCTGACTGCGCCGACTGAACGTTGATATTGATCCAAGTTTTGGGTTTTGATTTGATTTCAGTCGACCGCGAACCGCGAACAGCAAACAACTACCTATCAGACCTCAAGTGAGGCAAGGAGACCCGCTGAACTTA	k__Fungi(100);p__unclassified_Fungi(100);c__unclassified_Fungi(100);o__unclassified_Fungi(100);f__unclassified_Fungi(100);g__unclassified_Fungi(100);s__Fungi_sp(100);
Otu0100	5	8	0	0	0	0	0	0	0	1	M03053_189_000000000-D2L8J_1_1101_23697_18197	ATACGTAGTGTGAATTGCAGAATTCCGTGAACCATCGAATCTTTGAACGCATATTGCGCCCAAGACTTCGGTCGAGGGCATGTCTGCCTCAGCGTCGGTTTATCCCCTCGCTCCCCTTACACTTGTGTGAGTCGGCTGCCCAGCTCTGGGCTGGCTTGGGAGCGGATGTGGCTTTCCCACGATTCATTCGTGGGATGGCTGAAAAGCAGAGGCTAGAGCATGGACCCGCTTACGGGCTCAACTGGATAGGTAGGCCGGTGCGCGCTTCATTGCGTGCGCCCACTACACGAAGTTGACGCTTGTGGTGCATGCTGGCGGCCTGCAGGAATCACTGCGGAGGAGGGCGGTGGCTACACCGTAGCCGCCATCGCCCCGCAGTGAATACCCAACCATTCGACC…	k__Fungi(100);unclassified(100);unclassified(100);unclassified(100);unclassified(100);unclassified(100);unclassified(100);
Otu0101	5	8	0	0	0	0	0	0	0	1	M03053_189_000000000-D2L8J_1_1101_17343_6535	ATACGTAATGTGAATTGCAGGTTTTCGTGAATCATCGAATCTTTGAACGCACATTGCACCCTCTGGTATTCCGGAGGGTATGCCTGTTTGAGCGTCATTTCTCTCTCAAACCTTAGGGTTTGGTATTGAGTGATACTCTCTTCTGGGTTAACTTGAAATAGTGTACTGGCAAGAGTGTGCTTTTGTGGCCTCTTGACTGAGATAATGTATTAGGTTCTACCAACTCGTTATAGCAGCTCAACTGTCCCTTTGGCATATCAGCTCGGCCTGACAACTCCTTCTAAAGTTTGACCTCAAATCAGGTAGGACTACCCGCTGAACTTA	k__Fungi(100);p__Ascomycota(100);c__Saccharomycetes(100);o__Saccharomycetales(100);f__Saccharomycetales_fam_Incertae_sedis(100);g__Cyberlindnera(100);unclassified(100);
Otu0103	0	0	13	0	0	0	0	0	1	0	M03053_189_000000000-D2L8J_1_1101_27365_12961	ATACGTAGTGTGAATTGCAGAATTCCGTGAACCATCGAATCTTTGAACGCAAATTGCGCTCGAGGTCTCGGCCGAGAGCATGTCTGTCTCAGCGTCGGCTAACCCCCCTCACTCCCCTCCCTTTGTTTCCAAAAGGTTGGGGCAGTGGATCTGGCCGTCCCGGTGAACAGCCGGGTCGACCGAAGCACAGAGGCTTGTGCTTGGACCCCTCAAAGGGCAACAGCTTGGTAGGTGGCTTTTGCTACATGCCGCTGGAGCTTTGGAGTCCAAGCCGTATGGCCGGCAGGAAACTCTTCAATCATTCGACCTGAGATCAGGCAAGAACACCCGCTGAACTTA	k__Fungi(100);unclassified(100);unclassified(100);unclassified(100);unclassified(100);unclassified(100);unclassified(100);
Otu0104	4	9	1	0	0	0	0	0	0	0	M03053_189_000000000-D2L8J_1_1101_7868_10121	AAAAGCAATGCGAATTGCAGAATTCCGCGAGTCATCAGATCTTCGAACGCATCTGGCGCCGATCGGATCTCCGGTTGGCATGTTTGTTTCAGTGTGTTGTTAAGACTCACAAATCTTAATGTGATTGACTGTAGTGGTAAGGCGCAAGTCTTGTCACTCAGTCTCTCATGAAAGAAGCGCTGTGCGAACCGCACTGATGCAGTAGTCAGTCCTTGCGATTGATACTCATTGGTACGGATCATTCTACAGTGTCAAATCAAATCATCACACACGCATCTGAGACAAGCAAGATAACCCGCTGAACTTA	k__Fungi(100);unclassified(100);unclassified(100);unclassified(100);unclassified(100);unclassified(100);unclassified(100);
Otu0105	4	3	6	0	0	0	0	0	0	0	M03053_189_000000000-D2L8J_1_1101_24681_22818	ATAAGTAGTGTGAATTGCAGAATTCAGTGAATCATCGAATCTTTGAACGCATATTGCGCCCCTTGGTATCCCGGGGGGCATGCCTGTTCGAGCGTCATTTCAACCACTCAAGCCTAGCTTGGTATTGGGCATCGTTGTGCTTTAACTCTGTTATTCAGAGAAGGCAACGTGCCTTAAATATAGATGGCGGCAAGTATAAGTTCCGAGCGTAGCAGTAAAACATTTCGCTTTAGGTATTTTGTACATTGTCAGCTAAATAGTTAGCCATACTATTATTTTGACCTCGGATCAGGCAGGGATACCCGCTGAACTTA	k__Fungi(100);p__Ascomycota(100);c__Dothideomycetes(100);o__Dothideomycetes_ord_Incertae_sedis(100);f__Dothideomycetes_fam_Incertae_sedis(100);g__Halokirschsteiniothelia(100);s__Halokirschsteiniothelia_maritima(100);
Otu0106	3	7	0	3	0	0	0	0	0	0	M03053_189_000000000-D2L8J_1_1102_6640_19191	ATAAGTAATGCGAATTGCAGAATTCCAGTGAGTCATCGAATCTTTGAACGCACATTGCGCCCTTTGGTATTCCGAAGGGCATGCCTGTTCGAGCGTCATTATCACCCCTCAAGCCCTCGGCTTGGTGTTGGACGGTTTGGTGGAGGCCCCCTCGGGGGTTCCTGCCCCTCCCAAAGACAATGACGGCGGCCTCGTTGGACCCCCGGTACACTGAGTTCTTCACGGGACACGTATCGGACACATGGGTTTACGGGACACGGTCTGCCTCCCCTCAGGGAGAATCTTTCTAAGGTTGACCTCGGATCAGGTAGGGATACCCGCTGAACTTA	k__Fungi(100);p__Ascomycota(100);c__Eurotiomycetes(100);o__Chaetothyriales(100);f__Herpotrichiellaceae(100);g__Exophiala(100);unclassified(100);
Otu0107	0	10	2	0	0	0	0	0	0	0	M03053_189_000000000-D2L8J_1_1101_23092_13381	ATACGTAATGTGAATTGCAGAATTCAGCGAACCATCGAATCTTTGAACGCACATTGCGCCTGCCAGCATTCTGGCAGGCATGCCTGTCCGAGCGTCATTTCCCCCCTCACGCGCCCCGTCTGCGCGCTGGTGTTGGGGCTCCTCCGCCTGGCGGAGGGCCCTGAAAGCGAGTGGCGGGCCTGGCTGGTTGGCTCCGAGCGCAGTACCGAACGCACCGTTCCCCCTCTCGCTCGCGGGCCCCGCCGGCGCCCAGCCGTCAAAACCGCAGCGCGCCCCGCGCGCGCTGCACTTTTTACAAGGTTGACCTCGGATCAGGTAGGACTACCCGCTGAACTTA	k__Fungi(100);p__Ascomycota(100);c__Sordariomycetes(100);o__Ophiostomatales(100);f__Ophiostomataceae(100);g__Sporothrix(100);unclassified(100);
Otu0108	0	0	12	0	0	0	0	0	0	0	M03053_189_000000000-D2L8J_1_1101_19129_13878	ATAAGTAATGTGAATTGCAGAATTCAGTGAATCATCGAATCTTTGAACGCACATTGCGCCCGCCAGTATTCTGGCGGGCATGCCTGTTCGAGCGTCATTTCGACCCCTCAAGCCCGGCTTGGTGTTGGGGCCCCTACGTGCGCCGTAGGCCCCGAACTGCAGTGGCGGGCTCGCCGCGATCCCGAGCGTAGTAGCGTTACCTCGCTCAGGGCGCGCGGCGGGCGCCGGCCGTGAAAGAAAACCACTTTTCACCCCAAAAGGTTGACCTCGGATCAGGTAGGAATACCCGCTGAACTTA	k__Fungi(100);p__Ascomycota(100);c__Sordariomycetes(100);o__Boliniales(100);f__Boliniaceae(100);unclassified(100);unclassified(100);
Otu0109	0	0	12	0	0	0	0	0	0	0	M03053_189_000000000-D2L8J_1_1102_13829_12821	ATAAGTAGTGTGAATTGCAGAATTCAGTGAATCATCGAATCTTTGAACGCACATTGCGCCCTTTGGTATTCCTTAGGGCATGCCTGTTCGAGCGTCATTTCAAACTTCAAGCCCCCCTCATGGCTTGGTGTTGGGCGTCTGTCCTCCCCCCGGGACTCGCCTCAAATGCATTGGCAGCCGGCACGTTGGCTTCGAGCGCAGCAGAAACGCGCGCGGCGTCTGACGGTGCCTGGCTATCCAGGAAGCCTCCACCCCCAAGTTTGACCTCGGATCAGGTAGGGATACCCGCTGAACTTA	k__Fungi(100);p__Ascomycota(100);c__Dothideomycetes(100);o__Pleosporales(100);unclassified(100);unclassified(100);unclassified(100);
Otu0110	3	0	0	9	0	0	0	0	0	0	M03053_189_000000000-D2L8J_1_1101_19788_6974	ATACGTAATGTGAATTGCAGAATTCAGTGAATCATCGAATCTTTGAACGCACATTGCGCCCGCCAGTATTCTGGCGGGCATGCCTGTTCGAGCGTCATTTCAACCATCAAGCCCCAGGCTTGTGTTGGGGACCTGCGGCTGCCGCAGGCCCTGAAAATCAGTGGCGGGCTCGCTAGTCACTCCGAGCGTAGTAATACATCTCGCTCTGGACGTGCTTCGTGCTCCGGCCGTTAAACACCTTTTTTACCCAAGGTTGACCTCGGATCAGGTAGGAAGACCCGCTGAACTTA	k__Fungi(100);p__Ascomycota(100);c__Sordariomycetes(100);o__Sordariales(100);f__Chaetomiaceae(100);unclassified(100);unclassified(100);
Otu0111	3	9	0	0	0	0	0	0	0	0	M03053_189_000000000-D2L8J_1_1101_24562_16955	ATACGTAGTGTGAATTGCAGAATTCCGTGAACCATCGAATCTTTGAACGCATATTGCGCCCAAGACCTCGGTCGAGGGCATGTCTGCCTCAGCGTCGGTATAAACCCATCGCTTCCCTCCCCTGTTAAACCAAGGGGGTCGGCCCATCACTTGCTGGTGGGCTTGGAAGCGGAGCTGGCTTTCCCACGCTTCGTGCGTGGGTTGGCTGAAAAGCAGAGGCTAGAGCTAGGACCCATCATGGGCTCAACTGGATAGGTAGACCTGGCGCCTAACGGCACCTCCTACACGAAGTTGTGGCTTGTGGTCCTCGGCTGGCGGCCTGCAGGAAATGAGCGTGTGTGCGTGTTGGAGCTTCTGCTTCCACCGCCTCCGCCATCTACCATTCGACCTGAGCTCAGG…	k__Fungi(100);unclassified(100);unclassified(100);unclassified(100);unclassified(100);unclassified(100);unclassified(100);
Otu0112	12	0	0	0	0	0	0	0	0	0	M03053_189_000000000-D2L8J_1_1101_23199_11603	ATAAGTAGTGTGAATTGCAGAATTCAGTGAATCATCGAATCTTTGAACGCACATTGCGCTTCCTGGTATTCCGGGGAGCATGCTCGTTTCAGAATCATTACAATCTCACCATCCATTGTGTTCTCACTGGACATGATGTGTGTGTGGATTTGGATGTGTTTTGCTTATTTGTTTAAGCAAATCATTCTGAAATTCATTGTGTGTACTCCAATCGACTGATTGGCGAACCAAAGTGCAACAGATTTTTTCTTTACTCTTTGGGAAGCCTTTCGTGCTTTGAATGGTTGTATGCGCTCCAAATTATTACAGCTGCAGCATCAGTATGATGCTACTCCTGATAACTTGGTCTGAAATCGAGCAAGAAAACCCGCTGAACTTA	k__Fungi(100);p__Chytridiomycota(100);c__Chytridiomycetes(100);unclassified(100);unclassified(100);unclassified(100);unclassified(100);
Otu0113	5	0	6	0	0	0	0	0	0	0	M03053_189_000000000-D2L8J_1_1101_17929_11975	ATAAGTAATGTGAATTGCAGAATTCAGTGAATCATCGAATCTTTGAACGCACATTGCGCCCCTTGGTATTCCGAGGGGCATGCCTGTTCGAGCGTCATTATCACCCTTCAAGCTTTGCTTGGTGTTGGGGCATGCCATCACAGGCAGCCCTTAAAATCAGTGGCAGTAACCATTAGGCTCTAAGCGTAGTAATTCTTCTCGCTATAGCGTCTGGTGGTCGCGCGCCAAAACCCCCCATTTTTCATGATTGACCTCGGATCAGGTAGGGATACCCGCTGAACTTA	k__Fungi(100);p__Ascomycota(100);c__Leotiomycetes(100);o__Helotiales(100);f__Helotiales_fam_Incertae_sedis(100);g__Tetracladium(100);s__Tetracladium_furcatum(100);
Otu0114	10	0	0	1	0	0	0	0	0	0	M03053_189_000000000-D2L8J_1_1101_9207_3510	ATAAGTAATGTGAATTGCAGAATTCAGTGAATCATCGAATCTTTGAACGCACATTGCGCCCCTTGGTATTCCGAGGGGCATGCCTGTTCGAGCGTCATTATCACCCTCAAGCTTAGCTTGGTGTTGGGGCCTGCCGTAAGGCAGCCCTTAAAATCAGTGGCAGTGCTGTCAGGCTCTAAGCGTAGTAAATTCATCGCTATAGGGTCCTGGTGGTTACTCGCCAATAACCCCCCATTTTTAATGATTGACCTCGGATCAGGTAGGGATACCCGCTGAACTTA	k__Fungi(100);p__Ascomycota(100);c__Leotiomycetes(100);o__Helotiales(100);f__Helotiales_fam_Incertae_sedis(100);g__Tetracladium(100);unclassified(100);
Otu0115	0	0	10	0	0	0	0	0	1	0	M03053_189_000000000-D2L8J_1_1101_14661_14422	ATAAGTAATGTGAATTGCAGAATTCAGTGAATCATCGAATCTTTGAACGCACATTGCGCCCTCTGGTATTCCGGGAGGCATGCCTGTTCGAGCGTCATTACAACCCTCAAGCTCTGCTTGGTATTAGGCTTCACCCTCCGGGGTGGGCTTTAAAATCAGTGGCGGTGCCATTCAGCTTCAAGCGTAGTAATTCTTCTCGCTCTGGAGATCCGGCTGTGTGCCTGCCAGCAACCCCAATTTTTTAAAGGTTGACCTCGGATCAGGTAGGGATACCCGCTGAACTTA	k__Fungi(100);p__Ascomycota(100);unclassified(100);unclassified(100);unclassified(100);unclassified(100);unclassified(100);
Otu0116	0	11	0	0	0	0	0	0	0	0	M03053_189_000000000-D2L8J_1_1101_18474_12634	ATAAGTAGTGTGAATTGCAGAATTCAGTGAATCATCGAATCTTTGAACGCACATTGCGCTTCCTGGTATTCCGGGGAGCATGCTCGTTTCAGAATCATTACAATCTCACCATCCATTGTGTTCTCACTGGACATGATGTGTGTGTGGATTTGGATGTGTTTTGCTTATTTGTTTAAGCAAATCATTCTGAAATTCATTGTGTGTACTCCAATCGACTGATTGGCGAACCAAAGTGCAACAGATTTTTTCTTTACTCTTTGGGAAGCCTTTCGTGCTTTGATTGGTTGTATGCGCTCCAAATTATTACAGCTGCAGCATCAGTATGATGCTACTCCTGATAACTTGGTCTGAAATCGAGCAAGAAAACCCGCTGAACTTA	k__Fungi(100);unclassified(100);unclassified(100);unclassified(100);unclassified(100);unclassified(100);unclassified(100);
Otu0117	0	11	0	0	0	0	0	0	0	0	M03053_189_000000000-D2L8J_1_1101_27607_19542	ATAAGTAATGTGAATTGCAGAATTCAGTGAATCATCGAATCTTTGAACGCACATTGCGCCCGCCAGAATTCTGGCGGGCATGCCTGTTCGAGCGTCATTTCAACCCTCGAGCTCCCCTTGGGGAGCCCGGCGTTGGGGACCGGCAGTAACACCGCCGGCCCCGAAATGGAGTGGCGGCCCCGTCCGCGGCGACCTCTGCGTAGTAAATCCACTCGCACCGGGACCCGGGCGCGGCCACGCCGTAAAACACCCAACTTCCGAATGTTGACCTCGAATCAGGTAGGAATACCCGCTGAACTTA	k__Fungi(100);p__Ascomycota(100);c__Sordariomycetes(100);o__Hypocreales(100);f__Cordycipitaceae(100);g__unclassified_Cordycipitaceae(100);s__Cordycipitaceae_sp(100);
Otu0118	0	1	10	0	0	0	0	0	0	0	M03053_189_000000000-D2L8J_1_1102_16040_10549	ATACGTAATGTGAATTGCAGAATTCAGTGAATCATCGAATCTTTGAACGCATATTGCGCTCTTTGGTATTCCGAAGAGCATGCTTGTTTGAGTATCAGTAAACACCTCAACCTCTCTTTTTTGATAAAAAAAAGGGAGGGTGGACTTGAGCTATCCCAACGACCTTCACCGGTAGGCGGGCGGCTTGAAATGCAGGTGCAGCTGGACTTTTATCTGAGCTAAAAGCATATCTATTTAGTCCTCGTCAAACAGGATTATTACTTTTGCTGCAGCTAACATAAAGGATAATTGTCCTCTTTGCTGACTGATGCAGGATTTTACGACACTTTATGTGTTGTTCAACTCGATCTCAAATCAAGTAAGACTACCCGCTGAACTTA	k__Fungi(100);p__Zygomycota(100);c__Mortierellomycotina_cls_Incertae_sedis(100);o__Mortierellales(100);f__Mortierellaceae(100);g__Mortierella(100);s__Mortierella_minutissima(100);
Otu0119	4	7	0	0	0	0	0	0	0	0	M03053_189_000000000-D2L8J_1_1101_20814_7466	ATAAGTAATGTGAATTGCAGAATTCAGTGAACCATCGAATCTTTGAACGCACATTGCGCCCGGCAGTAATCTGCCGGGCATGCCTGTCCGAGCGTCATTTCTGCCCTCGAGCCTGTCCAGCATCTAGGTGCTGTTCCGGCCCGGCGTTGGGGCACTACGGGAAGCCTCGTGCTATCCCCCGTAGGCCCCGAAATGAAGTGGCGGTCCTGCCGCGGCTCCCCCTGCGTAGTATTACAGCTCGCTTCGGGACCCGGTGGAGGCCTGCCGTCAAACCTTACTCTCTAAGTTTGACCTCGGATCAGGTAGGGTTACCCGCTGAACTTA	k__Fungi(100);p__Ascomycota(100);c__Sordariomycetes(100);o__Microascales(100);f__Microascaceae(100);g__unclassified_Microascaceae(100);s__Microascaceae_sp(100);
Otu0120	3	1	6	0	0	0	0	0	0	0	M03053_189_000000000-D2L8J_1_1102_13491_16219	ATAAGTAGTGTGAATTGCAGAATTCAGTGAATCATCGAATCTTTGAACGCACATTGCGCCCCTTGGTATTCCATGGGGCATGCCTGTTCGAGCGTCATTTGTACCTTCAAGCTCTGCTTGGTGTTGGGTGTTTGTCCTTGCTCTAGTGGCGGGACTCGCCTTAAAGTAATTGGCAGCCAGTGTTTTGGTTTTGAAGCGCAGCACAAGTCGCGATTCAAGTCTATACGCTAGTTTCCACAAGTCTTTTATCACTTTTGACCTCGGATCAGGTAGGGATACCCGCTGAACTTA	k__Fungi(100);p__Ascomycota(100);c__Dothideomycetes(100);o__Pleosporales(100);unclassified(100);unclassified(100);unclassified(100);
Otu0121	4	6	0	0	0	0	0	0	0	0	M03053_189_000000000-D2L8J_1_1101_22936_24057	ATAAGTAATGTGAATTGCAGAATCCAGTGAATCATCGAATCTTTGAACGCAACTTGCGCCCTCTGGTATTCCGGAGGGCATGCCTGTTTGAGTGTCGTGAACACCTCAACCCTCCAATGTTTTTGCATTGAAGGCGTTGGTAGTGAGCGCTGCCGGATTTTGGATCGGCTCGCTTTAAAATCATTAGCTGGATCCATTCTGACCTGGTTCTACTCGGCGTAATAAGTTATTATCGTCGAGGACGCCTGGCCTTCTAGGCCGGCGGCCACAGTAAGGGTGTTTGAACCGCTTCTAACACGTCTTGCTCTTGTAGCAAACACTTGAACCTCTGACCTCAAATCAGGCAGGACTACCCGCTGAACTTA	k__Fungi(100);p__Basidiomycota(100);c__Wallemiomycetes(100);o__Geminibasidiales(100);f__Geminibasidiaceae(100);g__Geminibasidium(100);s__Geminibasidium_sp(100);
Otu0122	0	10	0	0	0	0	0	0	0	0	M03053_189_000000000-D2L8J_1_1101_15310_6249	ATACGTAGTGTGAATTGCAGAATTCCGTGAACCATCAAATCTTTGAACGCATATTGCGCTCAAGGCTTCGGCCGAGAGCATGTCTGCCTCAGCGTCGGGTTAATATCACTCCAAACAACCTTTGTTGGTTTAGTAAGAGTGGATCTGGCTGTCCCAATGCGCGTGTCGCTCTGTCAAAAGACGACTATCAAAGCGTGATGGGTCAGTTGAAGTATAGAGGTTGATACAAGGACCCTTATGGGCCGCAACTGGGTAGGCAGCTCACGCTTGCTATTTCTAGTTGTTGGCTTGGACCATGTATTGACCCTCAAGCAGGAATATATTAACCTTATTTTCTCGACCTGAGCTCAGGCAAGAACACCCGCTGAACTTA	k__Plantae(100);p__Chlorophyta(100);c__unclassified_Chlorophyta(100);o__unclassified_Chlorophyta(100);f__unclassified_Chlorophyta(100);g__unclassified_Chlorophyta(100);s__Chlorophyta_sp(100);
Otu0123	0	10	0	0	0	0	0	0	0	0	M03053_189_000000000-D2L8J_1_1101_27392_9872	ATAAGTAATGTGAATTGCAGAATTCAGTGAATCATCGAATCTTTGAACGCACATTGCGCCCGCTAGTACTCTAGCGGGCATGCCTGTTCGAGCGTCATTTCAACCCTCAAGCTCTGCTTGGTGTTGGGGCTCTACGTCTGACGTAGGCCCTGAAAGGAAGTGGCGGGCTCGCTACAACTCCGAGCGTAGTAATTCATTATCTCGCTAGGGAAGTGTGGCGTGCTCCTGCCGTTAAAGACCCCATCTTTAACCAAGGTTGACCTCGGATCAGGTAGGAATACCCGCTGAACTTA	k__Fungi(100);p__Ascomycota(100);c__Sordariomycetes(100);o__Coniochaetales(100);f__Coniochaetaceae(100);unclassified(100);unclassified(100);
Otu0124	0	0	10	0	0	0	0	0	0	0	M03053_189_000000000-D2L8J_1_1101_22830_18621	ATAAGTAATGTGAATTGCAGAATTCAGTGAATCATCGAATCTTTGAACGCACATTGCGCCCGCCAGCATTCTGGCGGGCATGCCTGTTCGAGCGTCATTTCAACCCTCGAGCTCGTCTTCATTGACGAGATCGGTGTTGGGGAACGGCAAAGCGGGACACAGTCCGGCGCCGACCCCGAAATTCAGTGGCGGCCCGTTGCGGCGACCTCTGCGTAGTAACTTAACCTCGCACTGGAAGAGCAGCGTGGCCACGCCGTAAAACCCCCGACTTTTTTAAGGTTGACCTCGAATCAGGTAGGACTACCCGCTGAACTTA	k__Fungi(100);p__Ascomycota(100);c__Sordariomycetes(100);o__Hypocreales(100);f__Cordycipitaceae(100);g__Simplicillium(100);unclassified(100);
Otu0125	7	3	0	0	0	0	0	0	0	0	M03053_189_000000000-D2L8J_1_1101_21452_8431	ATACGTAGTGTGAATTGCAGAATTCAGTGAATCATCGAATCTTTGAACGCACATTGCGCTCCCTGGCATTCCGGGGAGCATGCCCGTTTCAGAATCATTAAAAATCTCACGAACCTGATGTCCTTTCGGGGACCATGAGGCAAGTGAATTTGGATGTTTTGCTTTTGCAATCGTCTCAAAGTGATTGTGTGTGCACCAATTGAGCATCGATTGGTTTCCCAAGTGCAACAGATTTATCTATTCGCTGTGGAAGCCTCTCTTGAAGCTCTTGGGGCGCGTACTCAACCTCTTAACAAGAGTCGCATTCTTTGAGTGCGGTTCCTGATAACTTGGTCTGAAATCGGGCAAGAAAACCCGCTGAACTTA	k__Fungi(100);p__Chytridiomycota(100);c__Chytridiomycetes(100);o__Spizellomycetales(100);f__Spizellomycetaceae(100);g__Spizellomyces(100);unclassified(100);
Otu0126	8	1	0	0	0	0	0	0	0	0	M03053_189_000000000-D2L8J_1_1101_23195_10173	ATACGTAGTGTGAATTGCAGAAATACGTGAACCATCGAATCTTTGAACGCATATTGCGCCCGCGTCTTCGGACAAGGGCATGCCTGCCTCAGCGTCGGGTTAATCTTCGCAATACAAACCCTGTGTTTGTGCTTTTGCGGACCTGGTCGTCCCGATCAATTCAGTTTGGTCGGGTCGGCTGAAGAACAGAGGTTAACGCATGGACCCGATATGGGCCTCAACTGGGTAGGCAATTCGTTGCTAAATGCTTTAGTTGATGGCTTGTGGACCGTGCTTGTTGGCCCAAACCAGGAATCAAGCCTTTGGCTTGAAACACAACCCATTTTCTCGACCTGAGCTCAGACAAGAACACCCGCTGAACTTA	k__Fungi(100);unclassified(100);unclassified(100);unclassified(100);unclassified(100);unclassified(100);unclassified(100);
Otu0127	0	8	0	0	0	0	0	0	0	1	M03053_189_000000000-D2L8J_1_1101_16165_9542	AAAAGTAGTGTGAATTGCAGAATTCAGTGAATCATCGAATCTTTGAACGCACATTGCGCCCCTTGGTATTCCATGGGGCATGCCTGTTCGAGCGTCATTTGTACCCTCAAGCTCTGCTTGGTGTTGGGTGTTTGTCCCGCCTTCGCGTGTGGACTCGCCTTAAAGTCATTGGCAGCCGGAATAATTCTGGGGAACGCAGCACAACTGCAGCCTCCATTTTACGCCGAGCGTCCAGTAAGCCTTTTTTTCACGTTTGACCTCGGATCAGGTAGGGATACCCGCTGAACTTA	k__Fungi(100);p__Ascomycota(100);c__Dothideomycetes(100);o__Pleosporales(100);unclassified(100);unclassified(100);unclassified(100);
Otu0128	9	0	0	0	0	0	0	0	0	0	M03053_189_000000000-D2L8J_1_1101_22208_10007	ATAAGTAGTGTGAATTGCAGAATTCAGTGAATCATCGAATCTTTGAACGCACATTGCGCCCTGTGGTATTCCGCAGGGCATGCCTGTTCGAGCGTCATTTACCTACCTCAAGCTCTGCTTGGTGTTGGGCGTTTGTCCTGCCTTTTGGGCATGGACTCGCCTCAAATATATTGGCAGCCGTCACCCTGGCTTCGAGCGCAGCACATTTGCGCCTGATTTCTATGTGGTGGCTCCCCAGAAGCGTATTTTTTTTGGTTGACCTCGGATCAGGTAGGGATACCCGCTGAACTTA	k__Fungi(100);p__Ascomycota(100);c__Dothideomycetes(100);o__Pleosporales(100);f__Pleosporales_fam_Incertae_sedis(100);g__Anguillospora(100);s__Anguillospora_longissima(100);
Otu0129	0	4	5	0	0	0	0	0	0	0	M03053_189_000000000-D2L8J_1_1101_25673_11676	ATAAGTAATGTGAATTGCAGAATTCAGTGAATCATCGAATCTTTGAACGCACATTGCGCCCGCCAGTATTCTGGCGGGCATGCCTGTTCGAGCGTCATTTCAACCCTCAAGCCCCCGCGCTTGGTGTTGGGGTGCCGGCGTCAAGCGCTGCCCGCAGCGCCCGCCGCCCCCGAAATCGATTGGCGGTCTCGTCGCAGCCTCCCTTGCGTAGTAACATACCACCTCGCATGGCGGAGCGCGACGCGGCCACGCCGTAAAACGCCCCAATTTCTCAAGAGTTGACCTCGGATCAGGTAGGAATACCCGCTGAACTTA	k__Fungi(100);p__Ascomycota(100);c__Sordariomycetes(100);o__Hypocreales(100);f__Clavicipitaceae(100);unclassified(100);unclassified(100);
Otu0130	0	0	2	7	0	0	0	0	0	0	M03053_189_000000000-D2L8J_1_1102_12990_13495	ATACGTAGTGTGAATTGCAGAATTCCGTGAATCATCGAATCTTTGAACGCATATTGCGCTCGAGACTTCGGTCGAGAGCATGCCTGTCTCAGCGTCGGCTCACCCCTCGCCCACCCTCTTTCATTTTCTCTCTCGAAAGGAAGGAGGTGCCTGGGCGGACGTGGCCGTCTCGAGCCTTTTGGCGACAAGAGGCTCGGGTCGGCTGAAGTGCAGGGCTGTCACGGCGCGACCCGGACACGTGAGGGGCGCCAGCATGGTAGGTGGCTCGACGCTGCATGCCGCTGTCGCTTCCCTTTTCACACGAGCCGTCTCGTGCCAAAGCCACCAAGCAGGAAAACCCACTTTCAAACCCTTCGACCTGAGATCAGACAAGACCACCCGCTGAACTTA	k__Fungi(100);unclassified(100);unclassified(100);unclassified(100);unclassified(100);unclassified(100);unclassified(100);
Otu0131	8	1	0	0	0	0	0	0	0	0	M03053_189_000000000-D2L8J_1_1101_15433_14217	ATAAGTAATGTGAATTGCAGAATTCAGTGAATCATCGAATCTTTGAACGCACATTGCGCCCTCTGGTATTCCGGAGGGCATGCCTGTTCGAGCGTCATTATACCACTCAAGCTTAGCTTGGTATTGGGGCCCGCCCACCAGCGGCCTCTAAAATCAGTGGCGGTGCCGGTCGGCTCTAAGCGTAGTAATACTCCTCGCTATAGGGTCCGGTCGGTTGCTTGCCAACAACCCCAATTTTTATCAGGTTGACCTCGGATCAGGTAGGGATACCCGCTGAACTTA	k__Fungi(100);p__Ascomycota(100);c__Leotiomycetes(100);unclassified(100);unclassified(100);unclassified(100);unclassified(100);
Otu0132	9	0	0	0	0	0	0	0	0	0	M03053_189_000000000-D2L8J_1_1101_22843_6134	ATAAGTAATGTGAATTGCAGAATTCAGTGAATCATCGAATCTTTGAACGCACCTTGCGCCCTTTGGCCATTCCGAAGGGCATGCCTGTTTGAGTATCATGAACACCTCAACTCTTTATGGTTTTCCATGATGAGCTTGGACTTTGGGGGTTTTGCTGGCCTATGGTCAGCTCCTCTAAAATAAATCAGCTTACTGGTGTTTGGTGGGTATCATGGGTGTGATAACTATCTACGCTTGTGGTTTTTCCACCAGGTAACCTTCGACAGCGGAGGTTCACTGGAGCTCATAGATGTCTCTCCTCAGCGAGGACAGCCCTTTGAATGTTTGATCTCAAATCAGGTAGGACTACCCGCTGAACTTA	k__Fungi(100);p__Basidiomycota(100);c__Agaricomycetes(100);o__Thelephorales(100);f__Thelephoraceae(100);g__Tomentella(100);s__Tomentella_badia(100);
Otu0133	0	0	8	0	0	0	0	0	0	0	M03053_189_000000000-D2L8J_1_1101_18024_12767	ATAAGTAATGTGAATTGCAGAATCCAGTGAATCATCGAATCTTTGAACGCACATTGCGCCCGCCAGTATTCTGGCGGGCATGCCTGTCTGAGCGTCATTTCAACCCTCGCAACCAGCTTGCTGGATGCGGTGTTGGGGATCGGCCTCCCGTACTGGGAGGCCGTCCCTTAAATAGAGTGGCGGTTGCGCTGTGACCTCCTCTGCGTAGTAGCAATATCTCGCAGGCGGATAGCGGTGTAACCACGCCGTAAAACCCCCAACTCTTCTTTGGTTGACCTCAGATCAGGTAGGAATACCCGCTGAACTTA	k__Fungi(100);p__Ascomycota(100);c__Sordariomycetes(100);o__Hypocreales(100);unclassified(75);unclassified(75);unclassified(75);
Otu0134	1	7	0	0	0	0	0	0	0	0	M03053_189_000000000-D2L8J_1_1101_18548_7406	ATAACTAATGTGAATTGCAGAATTCAGTGAATCATCGAGTCTTTGAACGCACATTGCGCCCTCTGGTATTCCGGAGGGCATGCCTGTCCGAGCGTCATTGCTGCCCTCAAGCACGGCTTGTGTGTTGGGCCCCCGTCCCCCCCCTCTGCCGGGGGGACGGGCCCGAAAGGCAGCGGCGGCACCGCGTCCGGTCCTCGAGCGTATGGGGCTTCGTCACCCGCTCTTGTAGGCCCGGCCGGCGCCAGCCGACCCCAACCCTAAATTTTTTTCAGGTTGACCTCGGATCAGGTAGGGATACCCGCTGAACTTA	k__Fungi(100);p__Ascomycota(100);c__Eurotiomycetes(100);o__Eurotiales(100);f__Trichocomaceae(100);g__Penicillium(100);s__Penicillium_sumatraense(63);
Otu0135	0	8	0	0	0	0	0	0	0	0	M03053_189_000000000-D2L8J_1_1101_21467_9615	ATAAGTAATGTGAATTGCAGAATTCAGTGAATCATCGAATCTTTGAACGCACATTGCGCCCCTTGGTATTCCGAGGGGCATGCCTGTTCGAGCGTCATTATCAACCATCAAGCCCGGCTTGTTATTGGGCCCCTATCGCTCTAAGGAGTGATTGGCCCGAAAGATAATGGCGGTGTCAAGATTAGACCCCAGGTGCAGCGAGCTCTAAGCATACACTGAGGTGGTCGTTTTGGCCCAGCTTTTAATTATTGAATTTTTCAAGGTTGACCTCGGATCAGGTAGGATTACCCGCTGAACTTA	k__Fungi(100);p__Ascomycota(100);c__Eurotiomycetes(100);unclassified(100);unclassified(100);unclassified(100);unclassified(100);
Otu0137	6	2	0	0	0	0	0	0	0	0	M03053_189_000000000-D2L8J_1_1101_21201_12350	ATACGTAGTGTGAATTGCAGAATTCAGTGAATCATCGAATCTTTGAACGCACATTGCGCTCTCTGGTATTCCGGGGAGCATGCTCGTTTCAGAATCATTACAATCTCAAAGCCCAACTTGGCTTGCAAAAGCTTAGGGAAGCGCTTTGGATGTGGGCTCCTTTTGTCGGTTCTCCGGCAAATGGCCTGAAAATGATTGCGTTTGCCTCCGGTCGTGAGATCGGTCGTTACCAAGTGCAACAGATTTATTTGTTTTCTCTTGGGACGGTCGTTTTCTTCAACGTCGGAACGAACGCTCCACTTACCATACAGTCGAGAGAAGAAGTAATCGCTTTTCTCTTCTGAAGACTTGGTCTGAAATCGAGCAAGAAAACCCGCTGAACTTA	k__Fungi(100);unclassified(100);unclassified(100);unclassified(100);unclassified(100);unclassified(100);unclassified(100);
Otu0138	7	1	0	0	0	0	0	0	0	0	M03053_189_000000000-D2L8J_1_1101_17617_11834	ATACGTAGTGTGAATTGCAGAATTCCGTGAATCATCGAATCTTTGAACGCATATTGCGCCCACGGCCTCGGCTAAGGGCATGCCTGTCTCAGCGTCCGCTCACCCCATCGCCCACCCTTTCATTTTGAAAGCGGTTTGGACGGATGTGGCCGTCTCGCTCACCTTTTGGTAGAGCGGGTCGGCTGAAGCGCAGGGCTAGCGGCGGGACCCCATTCGATCGGGGCGCCAGCATGGTAGGTGGCTCACGCTCACATATCGGCTGTCGTCTCCCATATCACCGGGCGCTCCGCATGTTGCCACAGCAGGAAAACCAATCAAAACCTTGGACCTGAGATCAGACAAGACCACCCGCTGAACTTA	k__Fungi(100);unclassified(100);unclassified(100);unclassified(100);unclassified(100);unclassified(100);unclassified(100);
Otu0139	3	1	4	0	0	0	0	0	0	0	M03053_189_000000000-D2L8J_1_1101_27618_12200	ATACGTAGTGTGAATTGCAGAATTCCGTGAACCATCAAATCTTTGAACGCACATTGCGCTCAAGGCTTCGGCCAAGAGCATGTCTGCCTCAGCGTCGATTGACCCCCCTCGCCTCCCATCTACGCCGTTCATTGGGCTGTGGTGGCTTGACACAGCCTTTTACCGCTGTGCATCAACATGGAGACGGACCTGATCGTCCCAGGCTTCTTCTTAGCCTGGGTCGGTTGAAGCACAGAGGCTTGAGCTGGGACCCGTCATGGGCAGCGGCTGGATAGGTAGTATCAGCTCCGGCTGTCTACACGAAGCTGTTGCTTGGAGCCCAGCTGGGAGCCCACCAAAGCAGGAAATTCAAACCTCCGACCTGAGCTCAGGCAAGATTACCCGCTGAACTTA	k__Fungi(100);unclassified(100);unclassified(100);unclassified(100);unclassified(100);unclassified(100);unclassified(100);
Otu0140	5	0	0	3	0	0	0	0	0	0	M03053_189_000000000-D2L8J_1_1101_26391_12830	ATACGCAATGCGAATTGCAGAATTCCGCGAGTCATCAGATCTTTGAACGCAGCCCGCGCAGGAGGGGAATCCTTCCCGCATGTTTGTTTCAGTGTGTAAGGTTGACTTCACAAACCTCAATGCGATTGAGGCTTTTTTTCTCGAAAAGAAGCCTCTCTCGTTAAAGACGAGTCTGTGCGGTTGAGCCCGCCAACGGAGTGGTCACTGTTCTTCAGTGATTTCGTTGGGCAAACAGGTTCTTCCAACAAAAATCGCAGACTTCTTAAAAAATCTCTTCAATCCGCACCTGAAATCAAGCAAGATTACCCGCTGAACTTA	k__Fungi(100);unclassified(100);unclassified(100);unclassified(100);unclassified(100);unclassified(100);unclassified(100);
Otu0142	3	0	4	0	0	0	0	0	0	0	M03053_189_000000000-D2L8J_1_1102_14947_14208	ATACGTAGTGTGAATTGCAGAATTCCGTGAACCATCGAATCTTTGAACGCAAATTGCGCCCGAGGCCTCGGCCAAGGGCATGTCTATCTCAGCGTCGGTCCCTCCTCGCTGCCCCCCCTTTATGCGGGCTGGAAGCGGAGCTGGCCGTCTCGGCAAAATTTGCCGTGTCTGCCGAAGCGCATAGGCATTAGCGGCGCCCCATTCAACGGGCAACAGCTAAAGGTAGGTGGCTTTTGCCGCATACCGCTGGTGACCGGTGGCTGCCGCAGTCTGCCGGCAGGATGCTGCCTAAACCCAGCTTCTGCTGGGCGCAGCAATTTTTTTGTCGACCTGAGATTAGACAAGACCACCCGCTGAACTTA	k__Fungi(100);unclassified(100);unclassified(100);unclassified(100);unclassified(100);unclassified(100);unclassified(100);
Otu0143	1	3	0	2	0	0	0	0	1	0	M03053_189_000000000-D2L8J_1_1102_8172_14362	ATAAGTAATGTGAATTGCAGAATTCAGTGAATCATCGAATCTTTGAACGCACATTGCGCCCGCCAGTATTCTGGCGGGCATGCCTGTCCGAGCGTCATTTCAACCCTCGAACCCCTCCGGGGGGTCGGCGTTGGGGATCGGCCCTTTACGGGGCCGGCCCCGAAATACAGTGGCGGTCTCGCCGCAGCCTCTCCTGCGCAGTAGTTTGCACACTCGCATCGGGAGCGCGGCGCGTCCACAGCCGTTAAACACCCCAAACTTCTGAAATGTTGACCTCGGATCAGGTAGGAATACCCGCTGAACTTA	k__Fungi(100);p__Ascomycota(100);c__Sordariomycetes(100);o__Hypocreales(100);f__Hypocreaceae(100);g__Trichoderma(100);unclassified(100);
Otu0144	2	5	0	0	0	0	0	0	0	0	M03053_189_000000000-D2L8J_1_1101_21337_24135	ATAAGTAATGTGAATTGCAGAATTCAGTGAATCATCGAATCTTTGAACGCACATTGCGCCCGCCAGTATTCTGGCGGGCATGCCTGTTCGAGCGTCATTACAACCCTCAGGCCCCCGGGCCTGGCGTTGGGGATCGGCGGAGCCCCCCGTGGGCACACGCCGTCCCCTAAATACAGTGGCGGTCCCGCCGCAGCTTCCATTGCGTAGTAGCTAACACCTCGCAACTGGAGAGCGGCGCGGCCACGCCGTAAAACACCCAACTTCTGAATGTTGACCTCGAATCAGGTAGGAATACCCGCTGAACTTA	k__Fungi(100);p__Ascomycota(100);c__Sordariomycetes(100);o__Hypocreales(100);f__Nectriaceae(100);g__Fusarium(100);unclassified(100);
Otu0145	0	7	0	0	0	0	0	0	0	0	M03053_189_000000000-D2L8J_1_1101_11798_6306	ATAAGTAGTGTGAATTGCAGAATTCAGTGAATCATCGAATCTTTGAACGCACATTGCGCCCTTTGGTATTCCTTAGGGCATGCCTGTTCGAGCGTCATTTTCAAATTCAAGCTCAGCTTGGTGATGGGTGTCTGTCCCGCCTTTGCGCGCGGACTCGCCTCAAATGCAGTTGGCAGCTTATCCCTCGGCTCTAAACGCAGCAGAATTGTGTCGAGCGTCGGGCGGATAGGCTCTCCAGAAAGGAAACCCCCCACAAATTGACCTCGGATCAGGTAGGGATACCCGCTGAACTTA	k__Fungi(100);p__Ascomycota(100);c__Dothideomycetes(100);o__Pleosporales(100);f__Lophiostomataceae(100);unclassified(100);unclassified(100);
Otu0146	5	2	0	0	0	0	0	0	0	0	M03053_189_000000000-D2L8J_1_1101_22450_23620	ATACGTAATGCGAATTGCAGAATTCAGTGAATCATCAAATCTTTGAACGCAAATTGCGCTTTCGGGATAGGCCTGGAAGCACGCCTCTTTGAGTATCGATTCCACCACATTCACTAGTATGCTTGCATATTAGCGGAAACTGAGCCTTCATTGTCGAAAGTCAATGTGGCTTTAAAAGTGTTAAGTTCTGGCAGCCTTGTGAAGTCTGGCTCTCAGTCAGATAGCTTTCGCTCAAAGGCAAGTTCAGTGTCGCTAGTGACGTGGATAATTTCGTCTCGTACGAATCTTCCAAACGTGACTAGAGGATGTTGATGGTCTTTGTCGCTGGAAGTGAACGCACAGGCGCCAATTTAAGAGCGAACTCGAAGGTCTGAAATGGCTTTCAACATCTTGAATTAG…	k__Protista(100);p__Cercozoa(100);c__unclassified_Cercozoa(100);o__unclassified_Cercozoa(100);f__unclassified_Cercozoa(100);g__unclassified_Cercozoa(100);s__Cercozoa_sp(100);
Otu0147	0	7	0	0	0	0	0	0	0	0	M03053_189_000000000-D2L8J_1_1101_25021_20721	ATAAGTAATGTGAATTGCAGAATTTAGTGAATCATCGAATCTTTGAACGCACATTGCGCCCTTTGGTATTCCGAAGGGCATGCCTGTTCGAGCGTCATTATAACCACTCAAGCCTTTGCTTGGTATTGGGGTTCGCGGTCTCGCGGCCCCTAAAATCAGTGGCGGTGCCTGTCGGCTCTACGCGTAGTAATACTCCTCGCGATTGAGACCGGTGGGTAGCTTGCCAACAACCCTAATTTTCTCAGGTTGACCTCGGATCAGGTAGGGATACCCGCTGAACTTA	k__Fungi(100);p__Ascomycota(100);c__Pezizomycotina_cls_Incertae_sedis(100);o__Pezizomycotina_ord_Incertae_sedis(100);f__Pezizomycotina_fam_Incertae_sedis(100);g__Hymenula(100);s__Hymenula_cerealis(100);
Otu0148	5	2	0	0	0	0	0	0	0	0	M03053_189_000000000-D2L8J_1_1101_21200_5112	ATAAGTAATGCGAATTGCAGAATTTCAGTGAGTCATCGAATCTTTGAACGCACATTGCGCCCTTTGGTATTCCGAAGGGCATGCCTGTTCGAGCGTCATTATCAACCCTCAAGCCCCCTCGGGGTTTGGTTTTGGATGGCTTGGTCGGTCAAAACGACCCATCCTAAAGACAATGACGGCGGTGGATGTGATTGCACCCGGTACACTGAGCTTCTTTATTGAGCATGTATCAGGACGCAGCCGAACCTCCGGTCTTCTCCCTCACGGGAACCTTTTTTACAAGATTGACCTCGAATCAGGTAGGAATACCCGCTGAACTTA	k__Fungi(100);p__Ascomycota(100);c__Eurotiomycetes(100);o__Chaetothyriales(100);f__Herpotrichiellaceae(100);unclassified(100);unclassified(100);
Otu0149	6	0	0	0	0	0	0	0	0	0	M03053_189_000000000-D2L8J_1_1101_25188_9529	ATAAGTAATGTGAATTGCAGAATTCAGTGAATCATCGAATCTTTGAACGCACATTGCGCCCCTTGGTATTCCGGGGGGCATGCCTGTTCGAGCGTCATTATAACCCTCAAGCCTAGCTTGGTGTTGGAGCATGCTATCTAGCAGCTCTTAAAATCAGTGGCAGTGCCCTTCGGCTCTAAGCGTAGTAACTTCTCTCGCTATGGAAACCGGATGGTACGCGCCAAAACCCCCAACTTTCTATGGTTGACCTCGGATCAGGTAGGGATACCCGCTGAACTTA	k__Fungi(100);p__Ascomycota(100);c__Leotiomycetes(100);o__Helotiales(100);f__Hyaloscyphaceae(100);g__Cistella(100);s__Cistella_albidolutea(100);
Otu0150	0	6	0	0	0	0	0	0	0	0	M03053_189_000000000-D2L8J_1_1101_28104_13308	ATAAGTAATGTGAATTGCAGAATTCAGTGAATCATCGAATCTTTGAACGCACATTGCGCCCGCTAGTACTCTAGCGGGCATGCCTGTTCGAGCGTCATTTCAACCCTCAAGCCCTGCTTGGTGTTGGGGCCCTACGGCTGCCGTAGGCCCTGAAAGGAAGTGGCGGGCTCGCTACAACTCCGAGCGTAGTAATTCATTATCTCGCTAGGGACGTTGCGGCGCGCTCCTGCCGTTAAAGACCATCTTTAACTCAAGGTTGACCTCGGATCAGGTAGGAATACCCGCTGAACTTA	k__Fungi(100);p__Ascomycota(100);c__Sordariomycetes(100);o__Coniochaetales(100);f__Coniochaetaceae(100);unclassified(100);unclassified(100);
Otu0151	0	6	0	0	0	0	0	0	0	0	M03053_189_000000000-D2L8J_1_1101_25439_7546	ATAAGTAGTGTGAATTGCAGAATTCAGTGAATCATCGAATCTTTGAACGCACATTGCGCCCTTTGGTATTCCAAAGGGCATGCCTGTTCGAGCGTCATTTGTACCCTCAAGCTTTGCTTGGTGTTGGGCGTCTTGTCTCTAGCTTTGCTGGAGACTCGCCTTAAAGTAATTGGCAGCCGGCCTACTGGTTTCGGAGCGCAGCACAAGTCGCACTCTCTATCAGCAAAGGTCTAGCATCCATTAAGCCTTTTTTTCAACTTTTGACCTCGGATCAGGTAGGGATACCCGCTGAACTTA	k__Fungi(100);p__Ascomycota(100);c__Dothideomycetes(100);o__Pleosporales(100);f__Pleosporaceae(100);g__Alternaria(100);unclassified(100);
Otu0152	0	0	6	0	0	0	0	0	0	0	M03053_189_000000000-D2L8J_1_1101_26168_24065	ATAAGTAGTGTGAATTGCAGATTTCAGTGAATCATCGAATCTTTGAACGCACATTGCGCCCTTTGGTATTCCTTAGGGCATGCCTGTTCGAGCGTCATCTAAACCTTCAAGCACCGCTTGATGTTGGGCGTTTGTCCCGCCTCGGGCGTGGACTCGCCTCAAAAGCAATGGCGGCCTGTGTAACGGCTTCGAGCGCAGCAGATGCGCGCTTCGTCTCCTCGCACTGGCGTCCAGCAAGCCTAACTCCTCAGTTTGACCTCGGATCAGGTAGGGATACCCGCTGAACTTA	k__Fungi(100);p__Ascomycota(100);c__Dothideomycetes(100);o__Pleosporales(100);f__Pleosporales_fam_Incertae_sedis(100);unclassified(100);unclassified(100);
Otu0153	2	4	0	0	0	0	0	0	0	0	M03053_189_000000000-D2L8J_1_1101_20099_14067	ATAAGTAATGCGAATTGCAGAATTCAGTGAGTCATCGAATCTTTGAACGCACATTGCGCCCTGTGGTATTCCGCAGGGCATGCCTGTTCGAGCGTCATTTCAACCCTCAAGCTCTGCTTGGTGTTGGGCCCTGCCCGCTCGCGGCCGGCCCTAAAGACAGTGGCGGTTGCGTCTAGCTCCAAGCGTAGTACAACTCTCGCTCTGGGCCTGGGCGGCAGCCTGCCAGAACCCCCCTTTCTGTGGTTGACCTCGGATCAGGTAGGGATACCCGCTGAACTTA	k__Fungi(100);p__Ascomycota(100);c__Leotiomycetes(100);o__Leotiomycetes_ord_Incertae_sedis(100);f__Myxotrichaceae(100);g__Oidiodendron(100);s__Oidiodendron_sp(100);
Otu0154	1	5	0	0	0	0	0	0	0	0	M03053_189_000000000-D2L8J_1_1102_15586_11906	ATAAGTAGTGTGAATTGCAGAATTCAGTGAATCATCGAATCTTTGAACGCATATTGCGCCCCTCGGTATCCCGGGGGGCATGCCTGTTCGAGCGTCATTTCAACCACTCAAGCCTAGCTTGGTATTGGGCATCGTTGTGCTTTATAACTCTGTTATTCACAGAAGGCAACGTGTCTTAAATATAGATAGCGGCAAGTATAAATTCCGAGCGTAGCAGTAAAACATTTCGCTCTAGGTATTTTGTATATTGTCAGCTAAATAGTTAGCTATACTATTTATTTTGACCTCGGATCAGGCAGGGATACCCGCTGAACTTA	k__Fungi(100);p__Ascomycota(100);c__Dothideomycetes(100);o__Dothideomycetes_ord_Incertae_sedis(100);f__Dothideomycetes_fam_Incertae_sedis(100);g__Halokirschsteiniothelia(100);s__Halokirschsteiniothelia_maritima(100);
Otu0155	0	0	6	0	0	0	0	0	0	0	M03053_189_000000000-D2L8J_1_1101_24306_7725	ATAAGTAATGCGAATTGCAGAATTCCAGTGAGTCATCGAATCTTTGAACGCACATTGCGCCCTTTGGTATTCCGAAGGGCATGCCTGTTCGAGCGTCATTATCACCCCTCAAGCCCCCCGGGTTTGGTGTTGGACGGCCTGGCGGAGCAGGGAAACCCCTCGGGGTTCTCCCCCCGCCCCTCCTAAAGACAATGACGGCGGCTCTGTCGGACCCCCGGTACACTGAGTTCTTCACGGGACACGTACTGGACACACGGGTTCGCGGGGCACGGTCTGCCTCCCCTTGTGGGAGACCAACTTATCAAGGTTGACCTCGGATCAGGTAGGGATACCCGCTGAACTTA	k__Fungi(100);p__Ascomycota(100);unclassified(100);unclassified(100);unclassified(100);unclassified(100);unclassified(100);
Otu0156	0	0	6	0	0	0	0	0	0	0	M03053_189_000000000-D2L8J_1_1101_24231_9081	ATAAGTAATGCGAATTGCAGAATTCCGTGAGTCATCGAATCTTTGAACGCACATTGCGCCCCCTGGTATTCCGGAGGGCATGCCTGTCCGAGCGTCATTAGTCCAATCTCAAGCCCGGCTTGTCGTTGGGTCACACCGTCCCAGACGGAGGGCCCGAAAAAAAATGACGGGGACTGGCGGACCGTGGATGCAGCGAGCTTCACAGCACGCGTCCCGGTTCCGTATAGGCCCGTCTTCAACCACATTTTCTTAGGTTGACCTCGGATCAGACAGGATTACCCGCTGAACTTA	k__Fungi(100);p__Ascomycota(100);c__Eurotiomycetes(100);o__Verrucariales(100);f__Verrucariaceae(100);unclassified(100);unclassified(100);
Otu0157	0	0	6	0	0	0	0	0	0	0	M03053_189_000000000-D2L8J_1_1101_16458_4900	ATAGCTAGTGTGAATTGCAGATTTCAGTGAATCATCGAGTTTTTGAACGCACATTGCGCCCCTTGGTATTCCTCGGGGCATGCCTATTCGAGCGTCGTTTACCCCCCTCAAGCCTGGCTTGGTGTTGGAGCGCGCCGCGAAAGCGGCGGCTCTCGAAATCATCGGCGGTGCCGTGCGGCCTGGAACGCAGCAAAAATGCAGACCAGCCGCTCTACGCCTGCCGTGCAAGCGTGCTTTCGCACACATTTTACCACTTGACCTCGAATTAGGTAGGGATACCCGCTGAACTTA	k__Fungi(100);p__Ascomycota(100);c__Pezizomycotina_cls_Incertae_sedis(100);o__Pezizomycotina_ord_Incertae_sedis(100);f__Pezizomycotina_fam_Incertae_sedis(100);g__Leptodiscella(100);unclassified(100);
Otu0158	1	5	0	0	0	0	0	0	0	0	M03053_189_000000000-D2L8J_1_1101_25742_8640	ATACGTAATGTGAATTGCAGATCTTCAGTGAATCATCGAATCTTTGAACGCACATAGCGCCCGCCAGCACTCTGGCGGGCATGCCCGTCCGAGCGTCGATTACGCCACTCGAGCCCCCTGTGGGATCGGTGTTGGGGCACTAGAGGCAGCCGCCCCTAGGCCCCCAAAACCATTGCGCGGTCCCCGTGACAGGACCCGAGCACAGTAAACTCTCCTGTTGAGCTGCTCTGGGACACTGCGCGGTGGTGCCAGCCGTAAAACCCCCGACACAGGCCCCCCCTCCCCGGGGAGGCCGCCTGATGTTGACCTCGGATCGGGTAGGACGACCCGCTGAACTTA	k__Fungi(100);p__Ascomycota(100);unclassified(100);unclassified(100);unclassified(100);unclassified(100);unclassified(100);
Otu0159	0	6	0	0	0	0	0	0	0	0	M03053_189_000000000-D2L8J_1_1101_19586_13386	ATAAGTAATGTGAATTGCAGAATTCCGTGAATCATCGAATCTTTGAACGCACATTGCGCCCCCTGGCATTCCGGGGGGCATGCCTGTCCGAGCGTCATTGCTACCCCCTCAAGCGCGGCTTGTGTGTTGGGCGCTGTCCCCCCTTTTTCGGGGGGGACAGGCCTGAAAGGCAGTGGCGGCGTCGCGTCCGGTCCTCGAGCGTATGGGGCTTTGTCACCCGCTCTGAGAGGATCCGGCCGGGGCCTGTCTCACCCCCAATCTTCTCTAAGGTTGACCTCGGATCAGGTAGGGATACCCGCTGAACTTA	k__Fungi(100);p__Ascomycota(100);c__Eurotiomycetes(100);o__Eurotiales(100);f__Trichocomaceae(100);g__Sagenomella(100);unclassified(100);
Otu0160	4	0	2	0	0	0	0	0	0	0	M03053_189_000000000-D2L8J_1_1101_24518_9026	ATACGTAGTGTGAATTGCAGAATTCCGTGAACCATCGAATCTTTGAACGCATATTGCGCTCGAGCCCTCGGGCAAGAGCATGTCTGCCTCAGCGTCGGTTTACACCCTCACCCCTCCCTTAATTGGGTGTGCTTGCTCTAGTTGCAAGCCATTGGGGTGGATCTGGCTTCCCCAATCAGCCGTTTCACTGCGGCAGGTTGGGCTGGCTGAAGTGCAGAGGCTTAAGCAAGAACCCGATATGGGCTTCAACTGGATAGGTAGCACCGGCTTTGCCGACTACACGAAGTTGTTGCTTGTGGATCTTGCTAGGAGCCAAGCAGGAACGTGCCTTTGGCATGTCTAAACTTTCGACCTGAGCTCAGACAAGATTACCCGCTGAACTTA	k__Fungi(100);unclassified(100);unclassified(100);unclassified(100);unclassified(100);unclassified(100);unclassified(100);
Otu0161	0	6	0	0	0	0	0	0	0	0	M03053_189_000000000-D2L8J_1_1101_27064_14284	ATACGTAGTGTGAATTGCAGATTATGTGAACCATCGAATCTTTGAACGCAAATTGCGCCCGAGGCTTCGGCCAAAGGCATGTCTGCCTCAGCGTCGGCTTCACCCCTCCCCTCCCTTTCTCGTTTTTTCACAAAGAGAGAAAGGCGAGGGGGACCTGGTTGTCTCGGCCCTCACCGGCCGGGTCCGCCGAAGCACAGAGGCTCGAGCAGGACCCCGTTTACATGGGCAACAGTCTGGTAGGCGACCTCACCGGTCGCATGCCGCTGGTGCCTGGGGCGCCTGCTGCGTCGAGCCCGCAGGAAGTGGCTGCTTGCCACGCCTTCACCCATTCGACCTGAGTTCAGGCAAGAGCACCCGCTGAACTTA	k__Fungi(100);unclassified(100);unclassified(100);unclassified(100);unclassified(100);unclassified(100);unclassified(100);
Otu0162	0	6	0	0	0	0	0	0	0	0	M03053_189_000000000-D2L8J_1_1101_21376_8431	ATACGTAGTGTGAATTGCAGAATCCAGTGAACCATCGAATCTTTGAACGCACATTGCACCCATTGGTATTCCGATGGGTATGCCTGTTTGAGTGTCATGAACAACTCATTCCAACAACTTTTTTTGTTGGAGTGGACTTGAGCTTGCGTTGGCTGGCTCGAAATGTATGGTGGTGTGAAGACCTGCCGAGTTTAACGTCATATCATTTTCGCTAGACTTTTGGCAGCCATCTGGCCCTCAACCTTCTTTCAAATCTTGGCCTCAAATCAGGTAGGAGTACCCGCTGAACTTA	k__Fungi(100);p__Basidiomycota(100);unclassified(100);unclassified(100);unclassified(100);unclassified(100);unclassified(100);
Otu0163	6	0	0	0	0	0	0	0	0	0	M03053_189_000000000-D2L8J_1_1101_28610_13572	ATAAGTAATGTGAATTGCAGAATTCAGTGAATCATCGAATCTTTGAACGCACATTGCGCCCGCCAGTATTCTGGCGGGCATGCCTGTTCGAGCGTCATTTCAACCCTCAAGCCCCGGCTTGGTGTTGGGGACCGATCGGCTAGATCCGATCGCCCCCGAAATCTAGTGGCGATCCCACCAGCGCGTCCTCTGCGTAGTAATATACCCCGCTCTGGAACGTGGTGTGGTCATGCCGTTAAACCCCCTACTTCTCAAGGTTGACCTCGGATCAGGTAGGAATACCCGCTGAACTTA	k__Fungi(100);p__Ascomycota(100);c__Sordariomycetes(100);o__Hypocreales(100);unclassified(100);unclassified(100);unclassified(100);
Otu0164	0	5	0	0	0	0	0	0	0	0	M03053_189_000000000-D2L8J_1_1101_21665_6125	ATACGTAGTGTGAATTGCAGAATTCCGTGAACCATCAAATCTTTGAACGCACATTGCGCTCAAGGCTTCGGCCAAGAGCATGTCTGCCTCAGCGTCGATTGACCCCCCTCGCCTCCCACCTACGCCCCTCATTGGGCTGTGGTGCCTTGACACAGCCTTTTAGCGCTGTGAATCAACATGGAGACGGACCTGATCGTCCCAGGCTTGTTCTTAGCCTGGGTCGGTTGAAGCACAGAGGCTTGAGCTGGGACCCGTCATGGGCAGCGGCTGGATAGGTAGTATCAGCTCCGGCTGTCTGCACGAAGCTGTTGCTTGGAGCCCAGCTGGGAGCCCACCAAAGCAGGAAATTCAAACCTCCGACCTGAGCTCAGGCAAGATTACCCGCTGAACTTA	k__Fungi(100);p__unclassified_Fungi(100);c__unclassified_Fungi(100);o__unclassified_Fungi(100);f__unclassified_Fungi(100);g__unclassified_Fungi(100);s__Fungi_sp(100);
Otu0165	0	5	0	0	0	0	0	0	0	0	M03053_189_000000000-D2L8J_1_1101_20081_12766	ATACGTAGTGTGAATTGCAGAATTCCGTGAACCATCGAACCTTTGAACGCAAATTGCGCCCGCGTCCTCGGACAAGGGCATGTCTGCCTCAGCGTCGGCGTACCCCCTCACTCCCCCTTCCCCGGGTGGAGCGGACCTGGACGTCTCGGTTGCTGTAACAGGCACCGGGTCGGCTGAAGTTCAGAGCGCTTGAGCGGAGCCCCGTTTTAGGGCAATGGCTTGGTAGGTAGGAGTAAAACCCTGCATCACGCCTGCTGTTGCCTGAGGAGCGCCGCTGGGAGCCCGACCTTTGTTTGTTGATTCAAACGAAACCCCCCACACATTCGACCTGAGATCAGGCAAGACTACCCGCTGAACTTA	k__Fungi(100);unclassified(100);unclassified(100);unclassified(100);unclassified(100);unclassified(100);unclassified(100);
Otu0166	0	5	0	0	0	0	0	0	0	0	M03053_189_000000000-D2L8J_1_1102_23325_8857	ATAAGTAATGCGATTTGCAGAATTCCAGTGAGTCATCGAATCTTTGAACGCACATTGCGCCCTTTGGTATTCCGAAGGGCATGCCTGTTCGAGCGTCATTATCACCCCTCAGGCCCCCTGGGCTTGGTGTTGGACGGCTTGGTCGTGAGAATCGACCCCTCCTAAAGACAATGACGGCGGCCTCGTGGGACCCCCGGTACACTGAGCTTCTTAACCGAGCACGTACCGGACTTGAGGGTGCCCGGGCCACGGTCCTTCTTCCTTTAACCGGGAAAATATTTTACAAGGTTGACCTCGGATCAGGTAGGAATACCCGCTGAACTTA	k__Fungi(100);p__Ascomycota(100);c__Eurotiomycetes(100);o__Chaetothyriales(100);f__Herpotrichiellaceae(100);unclassified(100);unclassified(100);
Otu0167	2	3	0	0	0	0	0	0	0	0	M03053_189_000000000-D2L8J_1_1101_26365_12238	ATAAGTAATGTGAATTGCAGAATTCAGTGAATCATCGAATCTTTGAACGCACATTGCGCCCGCCAGTATTCTGGCGGGCATGCCTGTTCGAGCGTCATTTCAACCCTCAAGCCCCCGGGCTTGGTGTTGGGGATCGGCAAAACGGCCTCGCCAGAGGACGCGCCGGCCCCTAAATCTAGTGGCGGTCTCGCTGCAGCCTCCATTGCGTAGTAGCTAACACCCCGCAACTGGAACGCGGCGCGGCCAAGCCGTTAAACCCCCCAACTTTTTCTGAATGTTGACCTCGGATCAGGTAGGAATACCCGCTGAACTTA	k__Fungi(100);p__Ascomycota(100);c__Sordariomycetes(100);o__Hypocreales(100);f__Nectriaceae(100);unclassified(100);unclassified(100);
Otu0168	5	0	0	0	0	0	0	0	0	0	M03053_189_000000000-D2L8J_1_1101_25900_10379	ATAAGTAATGCGAATTGCAGAATTCCAGTGAGTCATCGAATCTTTGAACGCACATTGCGCCCTTTGGTATTCCGAAGGGCATGCCTGTTCGAGCGTCATTATCACCCCTCAAGCCCCTCGGCTTGGTGTTGGACGGCTTGGTGAACACTTCTCTGTTCACCCCTCCCAAAGACAATGACGGCGGCCTCGTTGGACCCCCGGTACACTGAGTTCCTCACCGAACACGTACTGGACAAAGGGCCCACGGGACACGGTCTGCCTCCCCTTAGGGAGAACTTTTCTTAAGGTTGACCTCGGATCAGGTAGGGATACCCGCTGAACTTA	k__Fungi(100);p__Ascomycota(100);c__Eurotiomycetes(100);o__Chaetothyriales(100);f__Herpotrichiellaceae(100);g__Exophiala(100);s__Exophiala_sp(100);
Otu0169	0	0	0	0	0	3	0	1	0	1	M03053_189_000000000-D2L8J_1_1101_26479_14534	ATACGTAATGTGAATTGCAGAATTCAGTGAATCATCGAATCTTTGAACGCACCTTGCGCTCCTTGGTATTCCGAGGAGCATGTCTGTTTGAGTGTCATGAACTCTTCAACCCATCAGTTTCTTATGAACTGGCTGGTGTTTGGTTTCTGAGCGCTGCTGGTCCACGGATCGAGCTCGTTCGTAATGCATTAGCATCTCTAATTCGACTTCGGATTGACTCAGTGTAATAGACTATTCGCTGAGGACACGCCTCACGGTGTGGCCGAATGAGATCTCAGTAGAAGCTGCCAACCCTTCTAGTCAATTTAAGATTAGACCTCAGATCAGATAGGATTACCCGCTGAACTTA	k__Fungi(100);p__Basidiomycota(100);c__Microbotryomycetes(100);unclassified(100);unclassified(100);unclassified(100);unclassified(100);
Otu0170	0	0	5	0	0	0	0	0	0	0	M03053_189_000000000-D2L8J_1_1101_26220_8160	ATAAGTAATGTGAATTGCAGAATTCAGTGAATCATCGAATCTTTGAACGCACATTGCGCCCGCCAGTACTCTGGCGGGCATGCCTGTTCGAGCGTCATTTCAACCCTCAAGCTCTGCTTGGTGTTGGGGATCGGCGTAGCGCCCTCGGGCGTCGCCGTCCCCTAAATCTAGTGGCGGTCCCGCTGTAGCCTCCTCTGCGTAGTAGTTTTCTCCTCGCACTGGAATCTCGGCGGTGCCCTGCCGTAAAACCCCCAACTTACCGAAATGTTGACCTCGAATCAGGTAGGAATACCCGCTGAACTTA	k__Fungi(100);p__Ascomycota(100);c__Sordariomycetes(100);o__Hypocreales(100);f__Nectriaceae(100);g__Volutella(100);s__Volutella_consors(100);
Otu0171	0	0	5	0	0	0	0	0	0	0	M03053_189_000000000-D2L8J_1_1101_15416_9654	ATAAGTAATGCGAATTGCAGAATTCCAGTGAGTCATCGAATCTTTGAACGCACATTGCGCCCTTTGGCATTCCGAAGGGCATGCCTGTTCGAGCGTCATTATCACCCCTCAAGCCCCGGCTTGGTGTTGGATGGTTGGTAGGACCTATTACTATGTCCCACCCCTCCCAAAGACAATGACGGCGGCCTCGTTGAACCCCCGGTACACTGAGTTCTTCACCGAGCACGTACTGGACAAGGGCTCGCGGGGCACGGTCTGCCTCCCCTCAGGGAGAATTTTTAACAAGGTTGACCTCGGATCAGGTAGGAATACCCGCTGAACTTA	k__Fungi(100);p__Ascomycota(100);unclassified(100);unclassified(100);unclassified(100);unclassified(100);unclassified(100);
Otu0172	0	5	0	0	0	0	0	0	0	0	M03053_189_000000000-D2L8J_1_1101_23354_22283	ATACGTAATGCGAATTGCAGAATTCATCGAGTCATCGAATCTTTGAACGCACATTGCGCCCGCTAGCACTCTAGCGGGCACGCCTGTCCGAGCGTCATTTCAACCCCTCAGGCCTCTCCTGCGTTGCCTGGCGTTGGGGCCCTGCGGCTCGCGCCGCAGGCCCTGAAAATCAGTGGCTGGCCTGCCTAGGAGCCCTGGCGTAGTAGTTCTCTCTCGCCTAGGGCCTCCCCGGAGGGTTTCTCTCGCCGTAAAACGCCTCCATCAAGCCTGTGAGAGCACTCGCAGCGAAAGGTTGACCTCGGATCAGGCGGGAATACCCGCTGAACTTA	k__Fungi(100);unclassified(100);unclassified(100);unclassified(100);unclassified(100);unclassified(100);unclassified(100);
Otu0173	0	5	0	0	0	0	0	0	0	0	M03053_189_000000000-D2L8J_1_1102_10431_6583	ATAAGTAATGTGAATTGCAGAATTCAGTGAATCATCGAATCTTTGAACGCACCTTGCGCCCTTTGGCTATTCCGAAGGGCATGCCTGTTTGAGTATCATGAACACACCTCAACTCTCGTGGTTTGCTACGACGAGCTTGGACTTTGGGGGTTTTGCTGGCCTGTGGTCGGCTCCTCTCAAACGAATCAGCTTCCCAGCGTTTGGTGGAGTCACAGGTGTGATAACTATCTACGCTTGTGGTCTTTACCAGATAACCTTCGGGTTCGCTGGGGCTCATAAATGTCTTTCCTCAGTGAAGACAGCTTTTGAACGTTTGATCTCAAATCAGGTAGGACTACCCGCTGAACTTA	k__Fungi(100);p__Basidiomycota(100);c__Agaricomycetes(100);o__Thelephorales(100);f__Thelephoraceae(100);unclassified(100);unclassified(100);
Otu0174	0	5	0	0	0	0	0	0	0	0	M03053_189_000000000-D2L8J_1_1101_28455_14548	ATAAGTAATGCGAATTGCAGAATTCAGTGAATCATCGAATCTTTGAACGCACATGGCGCCCGCTAGTATTCTGGCGGGCATGCCTGTCTGAGCGTCGTTTCGACCCTCGCCCCCGGCGTCTCGTCGGGGGCGGTGTTGGGGACCGGCCACCACCCTTCACTGGGCGGCCGCCCCCTAAATTCAGTGGCGACCACGCTGTAGCCTCCCCTGCGTAGTACTAAAACCCCCTCGCGGGCGGAGAGCGGTGCGGCCCGCCGTAAAACCCCCCAAACTTTTACAAGGTCGACCTCAGATCAGGTAGGGATACCCGCTGAACTTA	k__Fungi(100);p__Ascomycota(100);c__Sordariomycetes(100);o__Hypocreales(100);f__Hypocreales_fam_Incertae_sedis(100);g__Acremonium(100);s__Acremonium_masseei(100);
Otu0175	0	1	0	4	0	0	0	0	0	0	M03053_189_000000000-D2L8J_1_1101_13495_4064	ATACGTAGTGTGAATTGCAGAATTCCGCGAATCATCGAGTCTTTGAACGCAAGTTGCGCCCGAGGCTTGACCAAGGGCATCTCTGCCAGAGCGTCACCGCGACACCCACCAATCCACTCTAAGTGGATTGTGTGAAACTGGCCATCCGAATGTGGCCACCCGGGGGGGAACTTCCTTCCTGGGTGGCAGATTGGGTTGGCTGAAATGGAGGGAATTTGGCCGCCGTGGTGACACAGCCCGCGATCAGGTGATCCAGGTGTTCAAAAACCTGGAACTCAAACGTGCGCGTTGGTTGTGGCACCCAGACCCGAACTCCAAAGCAGGTCCCTACCGACACTTCGGCCTAAAAAGCCGGACGATGGAGGAAGGAAAAACGTCACGCATCAGACCTCTGATCAG…	k__Fungi(100);p__unclassified_Fungi(100);c__unclassified_Fungi(100);o__unclassified_Fungi(100);f__unclassified_Fungi(100);g__unclassified_Fungi(100);s__Fungi_sp(100);
Otu0176	0	5	0	0	0	0	0	0	0	0	M03053_189_000000000-D2L8J_1_1101_27242_12296	ATACGTAGTGTGAATTGCAGAATTCCGTGAATCATCGAATCTTTGAACGCATATTGCGCTCGAGACTCCGGTCGAGAGCATGCCTGTCTCAGCGTCGGCTCACCCCTCGCCCACACCTGTTCAACAAAAAAGAGCAGGTGCCTGGACGGACGTGGCCGTCTCGATTCTTTATCAAAAAGGATCGGGTCGGCTGAAGTGCAGGGCCCGCGGCGCGACCCGGACAAGAGGGGCGCCAGCATGGTAGGTGGCTCAACGCCGCATGCCGCTGTCGCCTTTCTTCGGAAAAAACCCGCTCGGCCACCAAGCAGGAAATGTTTGGGCGTCAGATTCATCTGGCCGCTCCAACAAAACAACCTTTCGACCTGAGATCAGACAAGACTACCCGCTGAACTTA	k__Fungi(100);unclassified(100);unclassified(100);unclassified(100);unclassified(100);unclassified(100);unclassified(100);
Otu0177	5	0	0	0	0	0	0	0	0	0	M03053_189_000000000-D2L8J_1_1101_21883_8816	ATACGTAATGTGAATTGCAGAATTCCGTGAACCATCCAATCTTTGAACGCATATTGCGCTCAAGGCCTCGGCCAAGAGCATGTCTGCCTCAGCGTCGGCTTTACCCTCGCCTTGGCTCCTCGCTAGTGGAGTTTTGGACGGAGCTGATGGTCTCGCTGCTGTCAGTGCAGCGGGTCCATTGAAACCCATCGGCCCAGCATTCACCCGCTTGGATGGTATCGTCCAGGTGCGCTGGCAAGGTAGGTGGCCTCGGCTGCATGCCGCCAGACAGCCTCGGGTGTATGCTTGGTGACCAACATATACTTACTACCTCGACCTGAGATCAGGCAAGATCACCCGCTGAACTTA	k__Fungi(100);unclassified(100);unclassified(100);unclassified(100);unclassified(100);unclassified(100);unclassified(100);
Otu0178	0	5	0	0	0	0	0	0	0	0	M03053_189_000000000-D2L8J_1_1102_4396_7717	AAAAGCAATGCGAATTGCAGAATTCCGCGAGTCATCAGATCTTCGAACGCACCTCGCGCCGATCGGATATCCGATCGGCATGCTTGTTTCAGTGTCTTGTTGAGACTTGCACATCTCATTGTGATTGATCCGGTGTGTTTCACGACTCATCGAATCTCTCACGAAGATAGATTGCGCACACCGCAACGATGCAGTAGTCAGTTCACGCTGATACTCATCGGTGAAGGTGTGATTCAGCAAACAATACACATAACTCATCCATATGCATCTGAACCAAGCAAGAACACCCGCTGAACTTA	k__Fungi(100);unclassified(100);unclassified(100);unclassified(100);unclassified(100);unclassified(100);unclassified(100);
Otu0179	0	5	0	0	0	0	0	0	0	0	M03053_189_000000000-D2L8J_1_1101_10467_16080	ATAAGTAATGTGAATTGCAGAATCTTGTGAATCATCGAATTTTTGAACGCACATTGCGCCCTATGGAATTCCATAGGGCATGCCTGTCTGAGCGTCAGCTCCCACCCCCTCAAGTCTTCTTTTATTTGGAGATTTGGATTAGTTTGAGGAAGTGTCATTTTTATGCCGCCCCTCAGAAATCTATAGGCAGTATGGTCAAACCTGAATGAGGCGTAATAAGGATATAAAATCGTCTATAAAGGAATGTCTGTACTAGTCTTCAACCCATTTATTTATACTTGGGTGACCTCAGATCAGGTAGGGATACCCGCTGAACTTA	k__Fungi(100);p__Ascomycota(100);c__Pezizomycetes(100);o__Pezizales(100);f__Pezizaceae(100);unclassified(100);unclassified(100);
Otu0181	3	1	0	1	0	0	0	0	0	0	M03053_189_000000000-D2L8J_1_1102_12607_10276	ATAAGTAATGTGAATTGCAGAATTCAGTGAATCATCGAATCTTTGAACGCACCTTGCACTCCTTGGTATTCCGAGGAGTATGCCTGTTTGAGTGTCATGAAATTATCAACTTCATAGTTTTGTTACTTATGAAGCTTGGATTTGGAAGTTGCTGGCTTTTAGTAGTCGGCTCTTCTTAAATGTATTAGCTGCTTGTCCGTGAGTTGGCTCAGAGTGTGATAAGTATCTACACTTGGTGGCTGATTGCTTGGATGTGGCTTCTAATCCGTTGTCTTTGGACAACAACTTCTTAAGATCTGACCTCAAATCAGGTAGGACTACCCGCTGAACTTA	k__Fungi(100);p__Basidiomycota(100);c__Agaricomycetes(100);o__Polyporales(100);f__Xenasmataceae(100);g__Xenasmatella(100);unclassified(100);
Otu0182	0	5	0	0	0	0	0	0	0	0	M03053_189_000000000-D2L8J_1_1101_27075_14896	ATAAGTAATGTGAATTGCAGACTTCAGTGAATCATCGAATCTTTGAACGCACATTGCGCCCGCTAGTATTCTGGCGGGCATGCCTGTTCGAGCGTCATTTCAACCCTCAAGCCCAGCTTGGTGTTGGGGACCGGCCGCTGCCTGACCGCCGCGGCCGCCCCCGAAACGCAGTGGCGGCCTCGCCGCAGCCTCCCTTGCGTAGTAGCACATCTCGCACCGGAGCGCGGCGCGGCCACGCCGTAAAACCCCCCAGACTTCTGAATGTTGACCTCGGATCAGGTAGGAATACCCGCTGAACTTA	k__Fungi(100);p__Ascomycota(100);c__Sordariomycetes(100);unclassified(100);unclassified(100);unclassified(100);unclassified(100);
Otu0183	0	0	4	0	0	0	0	0	0	0	M03053_189_000000000-D2L8J_1_1101_17010_13525	ATACGTAGTGTGAATTGCAGAATTCCGTGAACCATCGAATCTTTGAACGCAGATTGCGCTCGAGGCTTCGGCCGAGAGCATGCCTGCCTCAGCGTCGGTTATCACTCTCCAACACCCCCTCTCGGGTGCTGGGTCTTGGCGCTCTCTCGATCCCTGGGTCGAGGGTTGGCTGAAAACGATTGGGCAACCGGTTTTCCGGTCGGTTCAACTCGGTAGGTGGTCCCTCCCATTCAGTTGGGAGACTGCATGCCGTTGAAGCCTCGGATTGCCTCCAAAGGTGCCTTCAGCAGGACAACACATTGAAACCTTCGACCTGAGTTCAGGCAAGAACACCCGCTGAACTTA	k__Fungi(100);unclassified(100);unclassified(100);unclassified(100);unclassified(100);unclassified(100);unclassified(100);
Otu0184	3	1	0	0	0	0	0	0	0	0	M03053_189_000000000-D2L8J_1_1101_22243_22885	ATAAGTAATGTGAATTGCAGAATTCAGTGAATCATCGAATCTTTGAACGCACCTTGCGCCCTTTGGCCATTCCGAAGGGCATGCCTGTTTGAGTATCATGAACACCTCAACTCTCATGGCTTGCCATGACGAGCTTGGACTTTGGGGGTCTTGCTGGCCTTTGGTCGGCTCCTCTCAAATGAATTAGCTTTCCAGTGTCTGGCAGCATCACAAGTGTGATAAATATCTACGCTTGTGGTTTCCTGCTGGGTAACCTTCAGCGATGGGGGTTCGCTGGGGCTCATAAATGTCTCTCCTCAGCGAAGACAGTTTTGTGAACGTTTGATCTCAAATCAGGTAGGACTACCCGCTGAACTTA	k__Fungi(100);p__Basidiomycota(100);c__Agaricomycetes(100);o__Thelephorales(100);f__Thelephoraceae(100);unclassified(100);unclassified(100);
Otu0185	2	2	0	0	0	0	0	0	0	0	M03053_189_000000000-D2L8J_1_1101_25184_5807	CTCCGTCCTTTTCCTTTCCTCCTTCCTTTCCTCCTCTCCTCTTTTCCCTCCTCTTGCTCTCCTTTTTCTTCCTCTGCTCCTTCCTGTTTTCTTGTCGTGTACCTCTCCACCCCGCCGGGTTTTTTCCCGGTTGTGGGCTTGGATCGTGACGGATGCCGGCTGGAAGGTGTGGCTCTGTCGAAATACAAGAGTGGCTGACTCCCTATCCGGCCTGACTCGGCGTGATAATCAGACATCGCCGATTACGGAGAGGGGCAAAGGCTGCTGCGAAAGAGAAGGAGCAAAAAGACCGCAAAGCAGGGAGGACTACCCGCGGAACTTA	k__Fungi(100);p__Basidiomycota(100);unclassified(100);unclassified(100);unclassified(100);unclassified(100);unclassified(100);
Otu0186	0	0	0	0	0	0	0	4	0	0	M03053_189_000000000-D2L8J_1_1101_28649_19689	ATACGTAATGCGAATTGCAGAATTCAGTGAATCATCGAATCTTTGAACGCACATTGCGCTCTCTGGTATTCCGGAGAGCATGCTTGTTTGAGTATCAGTAAACACCTCAATTTCATAATTTTTTTTTAATTTTGAAATTGGACTTGAGCATATCCCAACGTGTATTTAATTATATGGAGGGTTGCTTCAAATGCAGGTGCAGCCGATCATTCTTCTGGGCTAAAAGCATTATCTAGTTAGACCCGTAAAACGGATTATTCATTTTATTGCTGCAGCTTACCTTTATGAAAGGAAGACATGGTCATTGTGCTGACTGATGCAGGATTTCTCAGAGGGGTCTGCAAAGACTTTTTTGAAAACTCGATCTCAAATCAAGTAAGACTACCCGCTGAACTTA	k__Fungi(100);p__Zygomycota(100);c__Mortierellomycotina_cls_Incertae_sedis(100);o__Mortierellales(100);f__Mortierellaceae(100);g__Mortierella(100);s__Mortierella_bisporalis(100);
Otu0187	0	2	2	0	0	0	0	0	0	0	M03053_189_000000000-D2L8J_1_1101_20806_16257	ATAAGTAATGTGAATTGCAGAATTCAGTGAATCATCGAATCTTTGAACGCACATTGCGCCCCTTGGTATTCCGAGGGGCATGCCTGTTCGAGCGTCATTATCACCCTTCAAGCTCTGCTTGGTGTTGGGGCCTGCTGTTAGGCAGCCCTTAAAATCAGTGGCAGTGACCATTAGGCTCTAAGCGTAGTAATTCTTCTCGCTATAGCGTCTAGTGGTTCCGCGCCAAAACCCCCAATTTTTTATGATTGACCTCGGATCAGGTAGGGATACCCGCTGAACTTA	k__Fungi(100);p__Ascomycota(100);c__Leotiomycetes(100);o__Helotiales(100);f__Helotiales_fam_Incertae_sedis(100);g__Tetracladium(100);s__Tetracladium_furcatum(100);
Otu0188	3	0	0	0	0	0	0	0	1	0	M03053_189_000000000-D2L8J_1_1101_19444_15403	ATAAGTAATGTGAATTGCAGAATTCAGTGAATCATCGAATCTTTGAACGCACATTGCGCCCATTAGTATTCTAGTGGGCATGCCTGTTCGAGCGTCATTTCAACCCTTAAGCTTAGCTTAGTATTGGGAATCTGCTTAACCGCAGCTCCTTAAATCTAGTTGGCAGAGCACAGCTGTACTCTGAGCGTAGTAATTCATTATCTCGCTTTCTGAAGACAGTCGTACGATAGCCACAAACTTTGCATCTTGCAAACTTTTTAATGGTTGACCTCGGATCAGGTAGGAATACCCGCTGAACTTA	k__Fungi(100);p__Ascomycota(100);c__Leotiomycetes(100);o__Helotiales(100);f__Helotiaceae(100);g__Idriella(100);s__Idriella_rara(100);
Otu0189	2	2	0	0	0	0	0	0	0	0	M03053_189_000000000-D2L8J_1_1101_20854_9648	ATAAGTAATGCGAATTGCAGAATTCCGTGAGTCATCGAATCTTTGAACGCACATTGCGCCCGCCAGCATTCTGGCGGGCATGCCTGTTCGAGCGTCATTTCAACCCTCAGGCCCTGCCTGGCGTTGGAGGACTGCGCACGCAGCCTCCCAAAGCGAGCGGCGGCGGCGCCCCGAAACCGAACGCAGTAGTTTTCTCTCGTTCTGGGTCCGGGTCGTTGTCCTGCCGGAAAACCCCCATCTATTCAATGGTTGACCTCGAATCAGGTAGGAATACCCGCTGAACTTA	k__Fungi(100);p__Ascomycota(100);c__Sordariomycetes(100);o__Chaetosphaeriales(100);f__Chaetosphaeriaceae(100);g__Chloridium(100);s__Chloridium_sp(100);
Otu0190	0	0	2	2	0	0	0	0	0	0	M03053_189_000000000-D2L8J_1_1102_13007_13475	ATAAGTAATGTGAATTGCAGAATTCAGTGAATCATCGAATCTTTGAACGCACATTGCGCCCGCCAGTATTCTGGCGGGCATGCCTGTCCGAGCGTCATTTCAACCCTCAAGCCCCCGGGCTTGGTGTTGGAGATCGGCGAGCCCCCCGGGGCGCGCCGTCTCCCAAATATAGTGGCGGTCCCGCTGTAGCTTCCTCTGCGTAGTAGCACACCTCGCACTGGGAAACAGCGTGGCCACGCCGTAAAACCCCCCACTTCTGAAAGGTTGACCTCGGATCAGGTAGGAATACCCGCTGAACTTA	k__Fungi(100);p__Ascomycota(100);c__Sordariomycetes(100);o__Hypocreales(100);f__Hypocreales_fam_Incertae_sedis(100);g__Ilyonectria(100);unclassified(100);
Otu0191	0	0	0	0	0	0	4	0	0	0	M03053_189_000000000-D2L8J_1_1101_9728_9154	ATACGTAATGCGAATTGCAGAACTCAGTGAATCATCCAATCTTTGAACGCAAATGGCACTCTCTGGAAACACCAGCCGGAGAGTATGCCTCCTTGAGTGTCGCGTATGATCGATGTGATCGCGCCAAGCGCCGGTGTGCACTTCGGTGTTCACGGGCGAGAATGAGTCGTTGGCAGGCATTTGGTTGTCGCCCATCACTCGAAATGCATGACTGCTGACTGCGCTGACTGCGCCGACTGAACGTTGAAATCCAAGTTTGAGTTGCGATATTTCAGTCGACCGCGAACCGCGAACAGCAAACAACTACCTATCAGACCTCAAGTGAGGCAAGGAGACCCGCTGAACTTA	k__Fungi(100);unclassified(100);unclassified(100);unclassified(100);unclassified(100);unclassified(100);unclassified(100);
Otu0192	0	3	1	0	0	0	0	0	0	0	M03053_189_000000000-D2L8J_1_1101_24323_17258	ATAAGTAATGTGAATTGCAGAATTCAGTGAATCATCGAATCTTTGAACGCACATTGCGCCCCTTGGTATTCCGGGGGGCATGCCTCTTCCAGCGTCATTTCACCCCTCAAGCTTTGCTTGGTTTTGGGCCGCGCCGGCAACGGCGGGCCTCGAAAATAGTGGCGACGCTATCGTGCTCTCAGCGTAGTAATTCTTCTCGCTGTTGAGTCCCGGTGGTCGTCCGCCAGCAACCCCCAACTTTCTTAAGTTTGACCTGGGATGAGGTAGGGATACCCGCTGAACTTA	k__Fungi(100);p__Ascomycota(100);c__Leotiomycetes(100);o__Helotiales(100);unclassified(100);unclassified(100);unclassified(100);
Otu0193	0	0	0	4	0	0	0	0	0	0	M03053_189_000000000-D2L8J_1_1101_23095_14670	ATACGCAATGCGAATTGCAGAATTCCGCGAGTCATCAGATCTTTGAACGCAGCCGGCGCTGGCGGGCTATCCCGTCAGCATGTTTGTTTCAGTGTGTTTGGTTGACTTCAAACAACTCAATGCGATTGAAGAAGAAGATTTTTCATCTTCTTCTCTCGTGAAAGAGGAGTGCGCGCGGTTTGCATCCGCCGACGAAGTGGTCACTGTTTACAGTGATTTCGTTGGAATCACAGATGCAGGCCAATTATACCGTGCATTTTTTCTTATAAAATTCTTCAATCGGCACCTGAAATCAAGCAAGATTACCCGCTGAACTTA	k__Fungi(100);unclassified(100);unclassified(100);unclassified(100);unclassified(100);unclassified(100);unclassified(100);
Otu0194	4	0	0	0	0	0	0	0	0	0	M03053_189_000000000-D2L8J_1_1101_24797_7150	ATAAGTAATGTGAATTGCAGAATTCAGTGAATCATCGAATCTTTGAACGCACATTGCGCCCTCTGGTATTCCGGGGGGCATGCCTGTTCGAGCGTCATTACAACCCTCAAGCTCTGCTTGGTATTAGGCTTCACCCTTAGGGGCGGGCTTTAAAATCAGTGGCGGTGCCATTCGGCTTCAAGCGTAGTAATTTTCTCGCTTTGGAGGACCGGGTGTGCGTTTGCCAGTAACCCCAAATTTTATAAAGGTTGACCTCGGATCAGGTAGGGATACCCGCTGAACTTA	k__Fungi(100);p__Ascomycota(100);c__Leotiomycetes(100);o__Leotiales(100);f__Leotiaceae(100);g__Alatospora(100);s__Alatospora_acuminata(100);
Otu0195	1	2	0	0	0	1	0	0	0	0	M03053_189_000000000-D2L8J_1_1101_19344_14545	ATACGTAATGTGAATTGCAGAATTCAGTGAATCATCGAATCTTTGAACGCACATTGCGCCCGCTAGTATTCTGGCGGGCATGCCTGTTCGAGCGTCATTTCAACCATCAAGCCCTGCTTGTGTTGGGGTCCTGCGGCTGCCCGCAGGCCCTGAAATCCAGTGGCGGGCTCGCTAGTCACTCCGAGCGCAGTAGCACATCTCGCTCAGGGCGTGCGGCGGGTTCTTGCCGTTAAACCACCCCTTTTATCAAGGTTGACCTCGGATCAGGTAGGAATACCCGCTGAACTTA	k__Fungi(100);p__Ascomycota(100);c__Sordariomycetes(100);o__Sordariales(100);f__Lasiosphaeriaceae(100);unclassified(100);unclassified(100);
Otu0196	4	0	0	0	0	0	0	0	0	0	M03053_189_000000000-D2L8J_1_1101_21664_8263	AAAAGTAGTGTGAATTGCAGAATTCAGTGAATCATCGAATCTTTGAACGCACATTGCGCCCCTTGGTATTCCATGGGGCATGCCTGTTCGAGCGTCATTTTGTACCCTCAAGCACTGCTTGGTGTTGGGCGTTTGTCCTGCAAAGGACTCGCCTGAAAGCGATTGGCGGCCAACGTACTGGTGGTAGAGCGCAGCACAATTTGCGTCTCTCCCTTCTACGTCGGCGTCCATGAAGCCTTTTTTCAACGTTTGACCTCGGATCAGGTAGGGATACCCGCTGAACTTA	k__Fungi(100);p__Ascomycota(100);c__Dothideomycetes(100);o__Pleosporales(100);f__Cucurbitariaceae(100);g__Pyrenochaetopsis(100);s__Pyrenochaetopsis_leptospora(100);
Otu0197	0	0	4	0	0	0	0	0	0	0	M03053_189_000000000-D2L8J_1_1101_20277_12583	AAAAGTAGTGTGAATTGCAGAATTCAGTGAATCATCGAATCTTTGAACGCACATTGCGCCCCTTGGTATTCCATGGGGCATGCCTGTTCGAGCGTCATTTGTACCCTCAAGCTCTGCTCTGTCGAAAGACGGAGTACCTTGGTGTTGGGTGTTTGTCCCGCCTCTGCGCGTGGACTCGCCTTAAAGTGATTGGCAGCCGGAATGATTCTGGGGAACGCAGCACAACTGCAGCCTCTAGACTTATACGCCGAGCGTCCACTAAGCCTTTATTCTTGCGTTTGACCTCGGATCAGGTAGGGATACCCGCTGAACTTA	k__Fungi(100);p__Ascomycota(100);c__Dothideomycetes(100);o__Pleosporales(100);unclassified(100);unclassified(100);unclassified(100);
Otu0198	0	4	0	0	0	0	0	0	0	0	M03053_189_000000000-D2L8J_1_1101_18634_9897	ATAAGTAGTGTGAATTGCAGAATTCAGTGAATCATCGAATCTTTGAACGCACATTGCGCCCTTTGGTATTCCTTAGGGCATGCCTGTTCGAGCGTCATTTAAACCTTCAAGCTCAGCTTGGTGTTGGGTGACTGTCCGCCGCCTCCGGGCGGTCGGACTCGCCTCAAATTGATTGGCGGCCGGTACTTTGGCTTCGAGCGCAGCAGAAACGCGAACTCGAGGCCGTCGTCCTGGCTCCCAGAAGCTATCTTCACAATTTTGACCTCGGATCAGGTAGGGATACCCGCTGAACTTA	k__Fungi(100);p__Ascomycota(100);c__Dothideomycetes(100);o__Pleosporales(100);f__Sporormiaceae(100);g__unclassified_Sporormiaceae(100);s__Sporormiaceae_sp(100);
Otu0199	4	0	0	0	0	0	0	0	0	0	M03053_189_000000000-D2L8J_1_1101_28656_13923	ATACGTAATGTGAATTGCAGAATTCAGTGAATCATCGAATCTTTGAACGCACATTGCACTCCTTGGTATTCCGAGGAGTATGCCTGTTTCAGTATCATGAGCACTCTCACAACCAACCTTTGCTGGTTAAATTGTGGAATTGGGATGCGCCAATTGTTACTGATTGGCCCTCCTAAAATGTAGCTCTTGACTGTGGACTGCTACAGTAGTTTGGCCTAATAGTTTTGGCACTTGTTTGTCAAATCTTTGGCTACATTTACTTTGGTCCATGCAGTCTTGATATACAGAAAACTCTAATACAACTTTGATCTGAAATCAGGTAGGGCTACCCGCTGAACTTA	k__Fungi(100);p__Zygomycota(100);c__Mucoromycotina_cls_Incertae_sedis(100);o__Mucorales(100);f__Umbelopsidaceae(100);g__Umbelopsis(100);s__Umbelopsis_sp(100);
Otu0200	4	0	0	0	0	0	0	0	0	0	M03053_189_000000000-D2L8J_1_1101_23314_8539	ATAAGTAATGTGAATTGCAGAATTCCGTGAATCATCGAATCTTTGAACGCATATTGCGCCCTCTGGTATTCCGGAGGGCATGTCTGTCCGAGCGTCATTATCACCTTCAAGCGCAGCTTGGTTGTTGAGTCAATTGTTCTTTTCATGGACAGGCTTGAAATGTAGTGGTGATGTCGAGTCTTGATGCCTGAGCGTATGGAGCTCTGTCACACGCTTTAGTGGCTCAGCCGGCATTCTGTCGATTGTTGATTTGGGCCTAAAAATCTAAGATTTAACCTTGGATCAGGTAAGGATACCCGCTGAACTTA	k__Fungi(100);unclassified(100);unclassified(100);unclassified(100);unclassified(100);unclassified(100);unclassified(100);
Otu0201	0	4	0	0	0	0	0	0	0	0	M03053_189_000000000-D2L8J_1_1102_9525_13669	ATAAGTAATGTGAATTGCAGAATCCAGTGAATCATCGAATCTTTGAACGCACCTTGCGCCCCTTGGTATTCCGAGGGGCACACCTGTTGGAGTGTCATGAATACCTCAACCCTTATAGGTTTTATCACTTATAAGGTGTTGGTTGTGAGCGTTTGCCGGTTGCAAGATCGGCTCGCTTTAAAATCATTAGCTGGATCCACTTTGACCTGGTTCTACTCGGCGTAATAAGTTATTATCGTTGAGGACACTTTTCTTAGGAATGGTGGCCACAGTAAAGGATGCGAACCGCTTCTAATACGTCTGCTTAGTCTTCGGGCTATGCAACACTTTTATCTCTGACCTCCAATCAGGTGGGACTACCCGCTGAACTTA	k__Fungi(100);p__Basidiomycota(100);c__Wallemiomycetes(100);o__unclassified_Wallemiomycetes(100);f__unclassified_Wallemiomycetes(100);g__unclassified_Wallemiomycetes(100);s__Wallemiomycetes_sp(100);
Otu0202	4	0	0	0	0	0	0	0	0	0	M03053_189_000000000-D2L8J_1_1101_17652_17934	ATAAGTAATGTGAATTGCAGAATTCAGTGAATCATCGAATCTTTGAACGCACATTGCGCCCGCCAGTATTCTGGCGGGCATGCCTGTTCGAGCGTCATTTCAACCCTCAAACCCCGCATTGTCCGGGGCTTTGGAGTTGGGGATCGGCTCCTCCCGCCCCGAGCGGTGCAGGAGGGGCCGGCCCCGAAAGTCAGTGGCGGTCCCGCCGTAGCATCCCCTGCGTAGTAATTACACCTCGCACCGGATCTCGGCGCGGCCATGCCGTAAAATTGCAGCGCGCCAGCGCAGCACTTCTGAAGGTTGACCTCGAATCAGGTAGGAATACCCGCTGAACTTA	k__Fungi(100);p__Ascomycota(100);c__Sordariomycetes(100);o__Hypocreales(100);f__Niessliaceae(100);g__unclassified_Niessliaceae(100);s__Niessliaceae_sp(100);
Otu0203	3	1	0	0	0	0	0	0	0	0	M03053_189_000000000-D2L8J_1_1101_14519_9009	ATAAGTAATGTGAATTGCAGAATTCAGTGAATCATCGAATCTTTGAACGCACATTGCGCCTGACAGTATTCTGTTAGGCATGCCTGTTCGAGCGTCATTTCAACCCTCAAGCCCTATTTGCTTGACGTTGGGAGTTTACGGAGACGTAATTCCTTAAATATAGTGGCGGAGCCGGGTCGTGCTCTGGGCGTAGTAACCAAACTCTCGCCTCTGTAGCCGGCTCGGGTCTTGCCGTAAAACCCCCTATATTCTTCTGGTTGACCTCGGATCAGGTAGGAATACCCGCTGAACTTA	k__Fungi(100);p__Ascomycota(100);c__Sordariomycetes(100);o__Xylariales(100);f__Xylariaceae(100);g__Biscogniauxia(100);s__Biscogniauxia_atropunctata(100);
Otu0204	0	0	0	0	0	0	0	0	4	0	M03053_189_000000000-D2L8J_1_1101_24113_9419	ATACGTAATGTGAATTGCAGAATTCAGTGAATCATCGAATCTTTGAACGCATATTGCGCTCTCTGGTATTCCGGAGAGCATGCTTGTTTGAGTATCAGTAAACACCTCAACTCCCTTTCTTCTTGAAATGGAGCTGGACTTGAGTGATCCCAACGCTTTATTCATAAAGCGGCGGGTTACTTGAAATGCAGGTGCAGCTGGACTTTTCTCTGAGCTATAAGCATATCTATTTAGTCCTCGTCAAACAGGATTATTACTTTTGCTGCAGCTAACATAAAGGATAATTGTCCTCTTTGCTGACTGATGCAGGATTTTACGACACTTTATGTGTTGTTCAACTCGATCTCAAATCAAGTAAGACTACCCGCTGAACTTA	k__Fungi(100);p__Zygomycota(100);c__Mortierellomycotina_cls_Incertae_sedis(100);o__Mortierellales(100);f__Mortierellaceae(100);g__Mortierella(100);unclassified(100);
Otu0206	0	0	4	0	0	0	0	0	0	0	M03053_189_000000000-D2L8J_1_1101_27279_8390	ATAAGTAGTGTGAATTGCAGAATTCAGTGAATCATCGAATCTTTGAACGCACATTGCGCCCTTTGGTATTCCTTAGGGCATGCCTGTTCGAGCGTCATCTAAACCCTCAAGCACCGCTTGATGTTGGGCGCCTGTCCCGCCGCGCGCGCGGACTCGCCTCGAAGAGATTGGCGGCCTGTGTGTTGGCCACGAGCGCAGCAGACCACGCGGCTCGTGCCCTCCCGCGCAGGCGCTCCAGGAAGCGACCCCCCCAATTTTGACCTCGGATCAGGTAGGGATACCCGCTGAACTTA	k__Fungi(100);p__Ascomycota(100);c__Dothideomycetes(100);o__Pleosporales(100);f__Lophiostomataceae(100);g__Lophiostoma(100);s__Lophiostoma_chamaecyparidis(100);
Otu0207	0	0	4	0	0	0	0	0	0	0	M03053_189_000000000-D2L8J_1_1101_23721_14608	ATATGTAGTGTGAATTGCAGAATTCAGTGAATCATCGAATCTTTGAACGCACATTGCGCTCCCTGGTATTCCGGGGAGCATGCTCGTTTCAGAATCATTAACATTCTCAAAGGCACGGTCTGAACCCTCGGGCGACGCCGTTACCCTTTCGGATGTGAGCCTCTTTGCTGCAAAGCAATGGCTTGAAAATGATTGTGTTTGCAACCGGCCTTCTTGGTTCGGTTCTCTCAAGTGCAACAGATGTTAGCTCATTCGTTACCTCTTGAAGAGAAGCGATTCCATGGTCTGGATCTTACACTCAACCAACATACACTTTCAGTGATCCTTGGATCATTGTCTGATAACTTGGTCTGAAATCGAGCAAGAAAACCCGCTGAACTTA	k__Fungi(100);p__Chytridiomycota(100);c__Chytridiomycetes(100);o__Spizellomycetales(100);f__Spizellomycetaceae(100);g__Powellomyces(100);s__Powellomyces_sp(100);
Otu0208	2	2	0	0	0	0	0	0	0	0	M03053_189_000000000-D2L8J_1_1102_13143_10639	ATACGTAGTGTGAATTGCAGAATTCCGTGAACCATCGAAACTTTGAACGCATATTGCGCCCGCGTCCTCGGACAAGGGCATGTCTGCCTCAGCGTCGGCGTACCCCCTCACGATCCTTTTTCTTCGGAAGAAGGTCTTGTGGACCTGGTCGTCTCGGAGTGGCGGTTTTTACAAACCCCTCGTTCCGGGTCGGCTGAAGCCCAGAGCGCTTGAGCGGGGGCCCCGATCACAGGGCAACGGCTTGGTAGGTTGGTCACCCAACACACGCCCCGCCGCTTGCCCCAGGAGCCACCGCTGGGAGCCTCACAAACCCACATCTCACATTTCGACCTGAGATCAGGCAAGACTACCCGCTGAACTTA	k__Fungi(100);unclassified(100);unclassified(100);unclassified(100);unclassified(100);unclassified(100);unclassified(100);
Otu0209	0	0	0	0	0	0	3	0	0	0	M03053_189_000000000-D2L8J_1_1101_21333_14950	ATACGTAATGTGAATTGCAGAATTCAGTGAATCATCGAATCTTTGAACGCAAATGGCACTCTCTGGAAACACCAGCCGGAGAGTATGCCTCCTTGAGTGTCGCGTATGATCGATGTGATCGCGCCAAGCGCCGGTGTGCACTTCGGTGTTCACGGGCGAGAGTGAGTCGTTGGCTGGCATTTGGTTGTCGCCCATCACTCGAAATGCATGACTGCTGACTGCGCTGACTGCGCCGACTGAACGTTGATATTGATCCAAGTTTTGGGTTTTGATTTGATTTCAGTCGACCGCGAACCGCGAACAGCAAACAACTACCTATCAGACCTCAAGTGAGGCAAGGAGACCCGCTGAACTTA	k__Fungi(100);unclassified(100);unclassified(100);unclassified(100);unclassified(100);unclassified(100);unclassified(100);
Otu0210	0	3	0	0	0	0	0	0	0	0	M03053_189_000000000-D2L8J_1_1101_27530_13699	ATAAGTAATGTGAATTGCAGAATTTAGTGAATCATCGAATCTTTGAACGCACATTGCACCTCTAGGTAATCCTTGAGGTATGCCTGTTCGAGCGCCGTTTATATTTAAGGCTTTGCCTTGCGTTGATGGATTTTACCCCGATTAAGGGGTTCATCGAAACATATTGGCGCCTAGTTTTCTGGAGGTCAATCGCAGCGAAAATGTGATTGATCCCAAAAGTAGGTGGCCTATTTGTAACCAAATACATGGCCTCGGATCAGGTAGGGATACCCGCTGAACTTA	k__Fungi(100);unclassified(100);unclassified(100);unclassified(100);unclassified(100);unclassified(100);unclassified(100);
Otu0211	3	0	0	0	0	0	0	0	0	0	M03053_189_000000000-D2L8J_1_1102_8390_18267	ATAAGTAATGCGAATTGCAGAATTCAGCGAGTCATCGAATCTTTGAACGCACATTGCGCCCCTCGGCATTCCGAGGGACACACCCGTCCGAGCGCCGTTCGAACCCTCAGGCCGTGCCTGGCGTTGGGGAGGCCGTGCGGCCCCCCCGAAACCCCTTGGCGACGCAGGGCCGTCCGCGAACGCAGCGAAAACCGCGTCCGGGCGGACCCCGCGGCCGCCGGTCCATTTCGGAAGGTTTGGCCTCGGATCGGGTGGGGACACCCGCTGAACTTA	k__Fungi(100);unclassified(100);unclassified(100);unclassified(100);unclassified(100);unclassified(100);unclassified(100);
Otu0212	0	3	0	0	0	0	0	0	0	0	M03053_189_000000000-D2L8J_1_1101_23871_9897	ATACGTAGTGTGAATTGCAGAATTCCGTGAATCATCGAATCTTTGAACGCATATTGCGCTCGAGACTCCGGTCGAGAGCATGCCTGTCTCAGCGTCGGCTCACCCCTCGCCCACACCTGCCCTTTGCAAAAGAGCAGGCGCCTGGACGGACGTGGCCGTCTCGATTCTTTACCAAAAAGGATCGGGTCGGCTGAAGTGCAGGGCCCGCGGCGCGACCCGGACAAGAGGGGCGCCAGCATGGTAGGTGGCTCAACGCCGCATGCCGCTGTCGCCTTTCTTCGGGAAAAAAACCGCTCGGCCACCAAGCAGGAAATGTTTGGGCGCCAGATTCATCTGGCCGCTCCAACAAAACAACCTTTCGACCTGAGATCAGACAAGACTACCCGCTGAACTTA	k__Fungi(100);unclassified(100);unclassified(100);unclassified(100);unclassified(100);unclassified(100);unclassified(100);
Otu0213	0	0	3	0	0	0	0	0	0	0	M03053_189_000000000-D2L8J_1_1101_23121_17978	ATAAGTAATGTGAATTGCAAAATTCCGTGAATCATCAAATCTTTGAACGCACTTTGCGCTCTTTGGTATCCCGAAGAGCATATCTGTTTGAGAATCAGTTTAAATCTCAACACGATTTTGTAGAAATATAAAGTCGTGATGGAGTTTAGACTTCACGAAACCGTGAGTCTTTAATTGTATTTGTCAGTCCACTTGAGCAATCAGTGGTCATATAACCAAGCCGAAAGGTCAAGTATATGATTGCGTTTGCAATGCAAGTTTGGCATTACCAAAAACACGAAAGAGTTTTCTCTTTTAAGACTTGATCTCAAATCAGATAAGACTACCCGCTGAACTTA	k__Fungi(100);unclassified(100);unclassified(100);unclassified(100);unclassified(100);unclassified(100);unclassified(100);
Otu0214	0	3	0	0	0	0	0	0	0	0	M03053_189_000000000-D2L8J_1_1102_11811_9915	ATAAGTAATGTGAATTGCAGAATTCAGTGAATCATCGAATCTTTGAACGCACATTGCGCCCGCCAGTATTCTGGCGGGCATGCCTGTTCGAGCGTCATTTCAACCACTCAGGCCCTGGTGCCTGGCGTCGGGGTATTTCTGTAACAAGAAATCCCCTAGAATCAGTGGCGGACCCGCCGCGGCTCCGAGCGTAGTAGTAAAATATCTCGCTATGGAGGTCCGTGGGGGGCTAACCGGCCGTAAAACCTCTTCTTTACTGAAGAACTTCTCAAGGTTGACCTCGGATCAGGTAGGAATACCCGCTGAACTTA	k__Fungi(100);p__Ascomycota(100);c__Sordariomycetes(100);o__Microascales(100);f__Halosphaeriaceae(100);g__unclassified_Halosphaeriaceae(100);s__Halosphaeriaceae_sp(100);
Otu0215	0	3	0	0	0	0	0	0	0	0	M03053_189_000000000-D2L8J_1_1102_9557_26436	ATAAGTAATGCGAATTGCAGAATTCAGTGAGTCATCGAATCTTTGAACGCACATTGCGCCCTGTGGTATTCCGCAGGGCATGCCTGTTCGAGCGTCATTTCAACCCTCAAGCTCTGCTTGGTGTTGGGCCCCGCCCGCTCGCGGCCGGCCCTAAAGACAGTGGCGGCAGCGCCTGGCTCCAAGCGTAGTACAGCTCTCGCTCTGGGGCTAGGCGGTAGCCTGCCAGAACCCCCCTTCTATGGTTGACCTCGGATCAGGTAGGGATACCCGCTGAACTTA	k__Fungi(100);p__Ascomycota(100);c__Leotiomycetes(100);o__Leotiomycetes_ord_Incertae_sedis(100);f__Myxotrichaceae(100);g__Oidiodendron(100);s__Oidiodendron_chlamydosporicum(100);
Otu0216	3	0	0	0	0	0	0	0	0	0	M03053_189_000000000-D2L8J_1_1101_17106_4900	ATAAGCAATGCGAATTGCAGAATTCCGCGAGTCATCAGATCTTTGAACGCAGCCCGCGCTTTGGAGCTCTCTCCTTAGCATGTTTGTTTCAGTGTGTTTGGTTGACTTCAAACAGCTCAATGCGATTGAACTCTCCTCTTTATTGAGAAGGGATCTCTCGTGAAAAGCGAAGGCGTGGGACTCAGCCCGCCAACGATGTGGTCACTGTCTAACAGTGGTTTCGTTGGGTAACATCGGTCTAGTCAAATTTAAAATACGCTTTAAAACTTTAAACAACCTTCAATCTGCACCTGAAATCAAGCAAGAACACCCGCTGAACTTA	k__Fungi(100);unclassified(100);unclassified(100);unclassified(100);unclassified(100);unclassified(100);unclassified(100);
Otu0217	0	2	1	0	0	0	0	0	0	0	M03053_189_000000000-D2L8J_1_1101_15961_17845	ATACGTAGTGTGAATTGCAGAATTCCGTGAACCATCGAATCTTTGAACGCATATTGCGCTCGAGGCTTCGGCCAAGAGCATGTCTGCCTCAGCGTCGGGTTCCCCCTCTCATCCCCTCTCACTTACTCATTCATCGAGTAAATAGAGGGCGGTGGATTTTGACAGTCTCTGAGACCTTGACTGGTCTCGGTGTCTGACTAAGCGCTCGCTTCGCCTTGAGCCGCCGCACCTTGTCAATCATTGACGGCCGCAGCTGGGTATGCAGCTTTACTGTTGCTACTCGTGAGTCTGCCGGTCATTCAAGACACGTGTGCCTCGTGTGCTGTTCTCGGCTTGGTGAAACATAACCCAGGAATTAGACTATGTACTTTCGAAGTATATTTTCGACTTTCTCGACCT…	k__Fungi(100);p__unclassified_Fungi(100);c__unclassified_Fungi(100);o__unclassified_Fungi(100);f__unclassified_Fungi(100);g__unclassified_Fungi(100);s__Fungi_sp(100);
Otu0218	2	0	1	0	0	0	0	0	0	0	M03053_189_000000000-D2L8J_1_1101_21672_13632	ATAAGTAATGTGAATTGCAGAATTCCGCGAATCATCGAATCTTTGAACGCACATTGCGCCCACCAGTACTCTGGTGGGCATGCCTGTCCGAGCGTCATTTCAACCCTCGAGCCCCCCCGTAGCGGGCTCGGTGCTGGGGCGCTACAGCGCGCGACTGCGTTGTAGGCTCCGAAATCTAGTGGCGGCCTCGCCGAGACCCCGAGCGCAGTAAACCGTGTCTTAGCACAGCGCCTCGCTCAGGGCGTCCGGCGGGTGCCCCGGCCGTAAAACCCCCTAAATTATAGAAAGTTGACCTCGGATCAGGTAGGAATACCCGCTGAACTTA	k__Fungi(100);p__Ascomycota(100);c__Sordariomycetes(100);unclassified(100);unclassified(100);unclassified(100);unclassified(100);
Otu0219	0	3	0	0	0	0	0	0	0	0	M03053_189_000000000-D2L8J_1_1102_9463_17064	ATAAGTAATGTGAATTGCAGAATTCAGTGAATCATCGAATCTTTGAACGCACATTGCGCCCATTAGTATTCTAGTGGGCATGCCTATTCGAGCGTCATTTCAACCCTTAAGCCTAAGTTGCTTAGCGTTGGGAATCTGCCCTGTATTACGGGGCAGTTCCCTAAAGTTATCGGCGGAGTTAGGGCATACTCTAAGCGTAGTACTATTATTCTCGCTTCTGCAGTTGTCCCTACGGCTTGCCGTTAAACCCCTATATTTTCTATGGTTGACCTCGGATTAGGTAGGAATACCCGCTGAACTTA	k__Fungi(100);p__Ascomycota(100);c__Sordariomycetes(100);o__Xylariales(100);f__Xylariaceae(100);g__Daldinia(100);unclassified(100);
Otu0220	0	0	3	0	0	0	0	0	0	0	M03053_189_000000000-D2L8J_1_1101_22110_24945	ATACGTAGTGTGAATTGCAGAATTCCGTGAACCATCGAATCTTTGAACGCATATTGCGCTCGAGCCTTCGGGCAAGAGCATGTCTGCCTCAGCGTCGGTTTACACCCTCACCCCTCCCAAGTCTTTGGGTGCGATTGGCGTCTATCGCCGTCCACAGGGGTGGATCTGGCTTCCCCAAACTGTAAATGTCAGGTTGGGCTAGCTGAAGTACAGAGGCTTAAGCAAGGACCCTTTGTGGCTCTAACTGGATAGGTAGAACCGGCTCTTGCCGACTACACGAAGTTATTGCTTGTGGAACTTGTTAGGGGCTTGGCAGGAACATGCCTAGTGCATGTCTAAACTTTCGACCTGAGCTCAGGCAAGGCTACCCGCTGAACTTA	k__Fungi(100);p__unclassified_Fungi(100);c__unclassified_Fungi(100);o__unclassified_Fungi(100);f__unclassified_Fungi(100);g__unclassified_Fungi(100);s__Fungi_sp(100);
Otu0221	0	3	0	0	0	0	0	0	0	0	M03053_189_000000000-D2L8J_1_1101_18045_13612	ATACGTAATATGAATTGCAGATATTCGTGAATCATCGAATCTTTGAACGCACATTGCGCCCTCTGGTATTCCGGAGGGCATGCCTGTTTGAGCGTCGTTTCTCCCTCAAACCGCTGGGTTTGGTGTTGAGCAATACGACTTGGGTTTGCTTGAAAGACGGTAGTGGTAAGGCGGGATCGCTTTGACAATGGCTTAGGTCTAACCAAAAACATTGCTTGCGGCGGTAACGTCCACCACGTATATCTTCAAACTTTGACCTCAAATCAGGTAGGACTACCCGCTGAACTTA	k__Fungi(100);p__Ascomycota(100);c__Saccharomycetes(100);o__Saccharomycetales(100);f__Saccharomycetales_fam_Incertae_sedis(100);g__Candida(100);s__Candida_albicans(100);
Otu0222	0	0	3	0	0	0	0	0	0	0	M03053_189_000000000-D2L8J_1_1101_23168_20625	ATAAGTAATGTGAATTGCAGAATTCAGTGAATCATCGAATCTTTGAACGCACCTTGCGCTCCTTGGTATTCCGAGGAGCATGCCTGTTTGAGTGTCATTTAATTCTCAACCACACTAGCTTTGTAAGTTGTGTGTGGCTTGGATATGGGGGCAATTCCTGCGGGCCTTTTCTTTGAGGTCAGCTCCCCTAAAATGTATTAGCGGAACCGATTGCGGTCAGGTCGCCGGTGTGATAATTATCTACGCCAAAGACGTAGGCTGCTCTCTATTGTTCAGCTTCCAATGGTCTTTATAGACAACTTCTGAATGCTTGACCTCAAATCAGGTAGGACTACCCGCTGAACTTA	k__Fungi(100);p__Basidiomycota(100);c__Agaricomycetes(100);o__Agaricales(100);f__Agaricaceae(100);unclassified(100);unclassified(100);
Otu0223	0	0	0	3	0	0	0	0	0	0	M03053_189_000000000-D2L8J_1_1101_15264_4414	ATAAGTAATGTGAATTGCAGAATTCAGTGAATCATCGAATCTTTGAACGCACCTTGCGCTCCTTGGTATTCCGAGGAGCATGCCTGTTTGAGTGTCATGAAATTCTCAACCCCATCGGTCCTTAACACCGGGTAGGGCTTGGATTATGGGAGCTGCCGGCGTTCCACAAAGTCGGCTCTTCTCAAATGCATTAGCAGGATCATTGCTCAATCATCTTTGATATGATAATTATCTATATCATGGAAATTTGGCTCACCTGCTTCCAACTGTCGTTAAAGACAAGCAATGACAATTTGACCTCAAATCAGGTAGGACTACCCGCTGAACTTA	k__Fungi(100);p__Basidiomycota(100);c__Agaricomycetes(100);o__Agaricales(100);f__Entolomataceae(100);unclassified(100);unclassified(100);
Otu0224	0	0	3	0	0	0	0	0	0	0	M03053_189_000000000-D2L8J_1_1101_25895_12904	ATAAGTAATGCGAATTGCAGAATTCCAGTGAGTCATCGAATCTTTGAACGCACATTGCGCCCTTTGGTATTCCGAAGGGCATGCCTGTTCGAGCGTCATTATCACCCCTCAAGCCCCTCTGGGTTTGGCCTTGGACGGTCTGGTCTCGGGTGACCCCGAGACCCCTCCCAAAGTGAATGACGGCGGCTTGTCTGACCCCCGGTACACTGAGCTTCTTAACTGAGCACGTATCGGTCCCAGTGGTTGGCGGACGACGGTCTCCTCCCCTCTCCCCAGGGGAAAAAACTCCTTTTACAAGGTTGACCTCGGATCAGGTAGGGATACCCGCTGAACTTA	k__Fungi(100);p__Ascomycota(100);c__Eurotiomycetes(100);o__Chaetothyriales(100);f__Herpotrichiellaceae(100);unclassified(100);unclassified(100);
Otu0225	3	0	0	0	0	0	0	0	0	0	M03053_189_000000000-D2L8J_1_1101_20382_8904	ATACGTAGTGTGAATTGCAGAATTCCGCGAATCATCGAGTCTTTGAACGCAAGTTGCGCCCGAGGCTTGACCAAGGGCATCTCTGCCAGAGCGTCACCGCGACACCCACCAATCCACTCTAAGTAAGTGGATTGAGTGAAACTGGCCATCCGAATGTGGCCACCCGGGGAGGGAAACCTTCCCGGGTGGCAGATTGGGTTGGCTGAAATGGAGGGAATTTGGCCGCCGTGGTGACACAGCCCGCGATCAGGTGATCCAGGTGTTCAAAAACCTGGAACTCAAACGTGCGCGTTGGTTGTGGCACCCCAGGATCCGATTCCAAAGCAGGTCCCTACCGACACTTCGGCCTAAAAAGCCGGACGATGGAGGAAGGAAAAACGTCACGCATCAGACCTCTGA…	k__Fungi(100);unclassified(100);unclassified(100);unclassified(100);unclassified(100);unclassified(100);unclassified(100);
Otu0226	0	3	0	0	0	0	0	0	0	0	M03053_189_000000000-D2L8J_1_1101_28187_17782	ATAAGTAGTGTGAATTGCAGAATTCAGTGAATCATCGAATCTTTGAACGCACATTGCGCCCCTTGGTATTCCATGGGGCATGCCTGTTCGAGCGTCATCTACACCCTCAAGCTCTGCTTGGTGTTGGGCGTCTGTCCCGCCTACGTGCGCGGACTCGCCCCAAATTCATTGGCAGCGGTCCTTGCCTCCTCTCGCGCAGCACATTGCGCTTCTCGAGGTGCGCGGCCCGCGTCCACGAAGCAACATTACCGTCTTTGACCTCGGATCAGGTAGGGATACCCGCTGAACTTA	k__Fungi(100);p__Ascomycota(100);c__Dothideomycetes(100);o__Pleosporales(100);f__Montagnulaceae(100);unclassified(100);unclassified(100);
Otu0227	0	3	0	0	0	0	0	0	0	0	M03053_189_000000000-D2L8J_1_1101_26148_16850	ATAAGTAATGTGAATTGCAGAATTCAGTGAATCATCGAATCTTTGAACGCACCTTGCGCTCCCTGGTATTCCGGGGAGCACGCCTGTTCGAGTGTCATGAAATTCTCAAACAAGATAGCTTTGTTGTTATCTCTGTTTGGATTTGGACTCTGCTGCGTCAATGCGGCTGGTCCTAAATGTATTAGCTGGCCCTCATGAAAGTTTGGTTCTACTCAGCGTGATAATTATCTGACGTTGAGGACGGTCGCAAGACTGGCCAGGCTCACTCTGGACTGCTTCTAATCGTCTTTGGACAATTATTCAATATCTGACCTCGAATCAGGTGGGACTACCCGCTGAACTTA	k__Fungi(100);p__Basidiomycota(100);c__Agaricomycetes(100);o__Cantharellales(100);f__Hydnaceae(100);g__Sistotrema(100);s__Sistotrema_sp(100);
Otu0228	3	0	0	0	0	0	0	0	0	0	M03053_189_000000000-D2L8J_1_1101_19636_14190	ATAAGTAATGTGAATTGCAGAATTCAGTGAATCATCGAATCTTTGAACGCACATTGCGCTCCCTGGTATTCCGGGGAGCATGCCTGTTCGAGCGTCATTACAACCCTCAAGCTCTGCTTGGTGTTGGGCCCCGCCGCCCCGGCGGGCCCTAAAGTCAGTGGCGGTGCCGTCCGGCTCCGAGCGTAGTAATTTTTCTCGCTTTGGAGGCCCGGGCGCGTGCTCGCCATCAACCCCCAATTTTTTTCAGGTTGACCTCGGATCAGGTAGGGATACCCGCTGAACTTA	k__Fungi(100);p__Ascomycota(100);c__Leotiomycetes(100);o__Leotiomycetes_ord_Incertae_sedis(100);f__Myxotrichaceae(100);g__Gymnostellatospora(100);unclassified(100);
Otu0229	1	2	0	0	0	0	0	0	0	0	M03053_189_000000000-D2L8J_1_1101_23879_14170	ATAAGTAATGTGAATTGCAGAATTCAGTGAATCATCGAATCTTTGAACGCACATTGCGCCCGCCAGTATTCTGGCGGGCATGCCTGTCTGAGCGTCATTTCAACCCTCAGCGCCCGTCCGCGGGAGCTGGTGTTGGGGATCGGCCGTCCTTGCGGCGGCCGGCCCCGAAATCTAGTGGCGGTCTCCTCGCGACCTCCTCTGCGTAGTAACACTACCTCGCAGCTGGATAGCGGTCTGACCACGCCGTAAAACCCCAACTTCTCAAGGTTGACCTCAGATCAGGTAGGAATACCCGCTGAACTTA	k__Fungi(100);p__Ascomycota(100);c__Sordariomycetes(100);o__Hypocreales(100);f__Hypocreales_fam_Incertae_sedis(100);g__Stilbella(100);s__Stilbella_sp(100);
Otu0230	0	0	3	0	0	0	0	0	0	0	M03053_189_000000000-D2L8J_1_1102_9267_17102	ATACGTAATGTGAATTGCAGAATTCAGTGAATCATCGAATCTTTGAACGCACATTGCACCCGGTGGTATTCCGCCGGGTATGCCTGTTCGAGCGTCATTTCCACCCTCAGGCCCCCCTCCTCACGGGGGAAGGGCCTGGTGTTGGGGATCTACGGGCCCTTTTCTGGCGCTTGTAGTCTCCTAAATTAATCGGCGTGCGCGCTGTACGTTGCCCCCTGCGTAGTAGTGATTTCTCGCATCGGGCCGTAGCGCTGTCCAGCCGCTAAACTGCAACTACGCATTTAGCTAGGTTTGACCTCGAATCAGGTAGGGTTACCCGCTGAACTTA	k__Fungi(100);p__Ascomycota(100);unclassified(100);unclassified(100);unclassified(100);unclassified(100);unclassified(100);
Otu0231	0	0	0	0	0	0	0	3	0	0	M03053_189_000000000-D2L8J_1_1101_15981_4958	ATACGTAATGTGAATTGCAGAATTCAGTGAATCATCGAATCTTTGAACGCACCTTGCACTCTTTGGTATTCCGAAGAGTATGTCTGTTTGAGTGTCATGAAACTCTCAACCCCCTCATTTTGTAATGAAGTGAGTCGTGGGCTTGGATTATGGCTGTCTGTCGGCTTCATTGCCGGCTCAGCTGAAATACACGAGTAACCCAGTTTGAAAAACTGACGGCTTGACTCGGCGTAATAATTATTATCGCTGAGGACGTCTAACCTTCAAATCGTTAGTGGTGCTTCTAATGCAAATTATTTTAAGATTTAGACCTCAAATCAGTCAGGATTACCCGCTGAACTTA	k__Fungi(100);p__Basidiomycota(100);unclassified(100);unclassified(100);unclassified(100);unclassified(100);unclassified(100);
Otu0232	0	0	3	0	0	0	0	0	0	0	M03053_189_000000000-D2L8J_1_1101_27455_10844	ATAAGTAATGTGAATTGCAGAATTCAGTGAATCATCGAATCTTTGAACGCACATTGCGCCCGCCAGTATTCTGGCGGGCATGCCTGTCCGAGCGTCATTTCAACCCTCGAACCCCTCCGGGGGGTCGGCGTTGGGGACCTCGGGAGCCCCTAAGACGGGATCCCGGCCCCGAAATACAGTGGCGGTCTCGCCGCAGCCTCTCCTGCGCAGTAGTTTGCACAACTCGCACCGGGAGCGCGGCGCGTCCACGTCCGTAAAACACCCAACTTCTGAAATGTTGACCTCGGATCAGGTAGGAATACCCGCTGAACTTA	k__Fungi(100);p__Ascomycota(100);c__Sordariomycetes(100);o__Hypocreales(100);f__Hypocreaceae(100);g__Trichoderma(100);unclassified(100);
Otu0233	3	0	0	0	0	0	0	0	0	0	M03053_189_000000000-D2L8J_1_1101_29532_14805	ATAAGTAATGCGAATTGCAGAATTTCCGTGAGTCATCGAATCTTTGAACGCACATTGCGCCCTTTGGTATTCCGAAGGGCATGCCTGTTCGAGCGTCATTATCCCCCCTCAAACCTCGTGTTTGGTGTTGGACCCGTGTTGGTTGGCGACGACCAACTGGTCCCAAAGACAATGACGGTTCCCGCTGGGACCCTTGGTGCAACGAGCTTCTTTCGAGAGCACGCATCGGGCGGGACCCAGCGGGCCGGTCTCCTTAAACTATTTTCTAAGGTTGACCTCGGATCAGGTAGGAATACCCGCTGAACTTA	k__Fungi(100);p__Ascomycota(100);unclassified(100);unclassified(100);unclassified(100);unclassified(100);unclassified(100);
Otu0234	0	3	0	0	0	0	0	0	0	0	M03053_189_000000000-D2L8J_1_1101_18083_6437	ATAAGTAATGTGAATTGCAGAATTCAGTGAATCATCGAATCTTTGAACGCACATTGCGCCCCTTGGTATTCCGAGGGGCATGCCTATTCGAGCGTCATTATCACCCCTCAAGCCTAGCTTGGTGTTGGGGCTTGCTGTAAAGGCAGCCTCTAAAATCAGTGGCAGTGCTGTCAGGCTCTAAGCGTAGTAAATTCATCGCTATAGGGTCCTGGTGGATACTCGTCAAAACCCCCCATTTTTAATGATTGACCTCGGATTAGGTAGGGATACCCGCTGAACTTA	k__Fungi(100);p__Ascomycota(100);c__Leotiomycetes(100);o__Helotiales(100);f__Helotiales_fam_Incertae_sedis(100);g__Tetracladium(100);s__Tetracladium_sp(100);
Otu0235	0	0	3	0	0	0	0	0	0	0	M03053_189_000000000-D2L8J_1_1101_19966_15741	ATAAGTAATGAGAATTGCAGAATTCAGTGGATCATCGAATCTTTGAACGCACATTGCGCCCCTTGGTATTCCGAGGGGCATGCCTGTTCGAGCGTCATTTCAACCCTCAAGCTCTGCTTGGTCTTGGGCCTGGCCGCGATGGCCGGTCCTAAAATCAGTGGCGGTGCCGTCGCAGGCTCCAAGCGTAGTACATCTCTCGCTCTGGAAGCCCGGCGGTGCCTGCCAGACAACCCCTAATTGTCTCTTACGGTTGACCTCGGATCAGGTAGGGATACCCGCTGAACTTA	k__Fungi(100);p__Ascomycota(100);c__Leotiomycetes(100);o__Helotiales(100);f__Helotiales_fam_Incertae_sedis(100);g__Scytalidium(100);s__Scytalidium_album(100);
Otu0236	0	0	3	0	0	0	0	0	0	0	M03053_189_000000000-D2L8J_1_1101_28286_17551	ATACGTAGTGTGAATTGCAGAATTCCGTGAATCATCGAATCTTTGAACGCATATTGCGCTCGAGACTTCGGTCGAGAGCATGCCTGTCTCAGCGTCGGCTCACCCCTCGCCCACCCTTTCCCCTTCACCGGAGGAGAGGTGCCTGGACGGACGTGGCCGTCTCGCTTCCGAAAGGGAGCGGGTCGGCTGAAGTGCAGGGCCCGCGGCGCGACCCGGACGAGAGGGCGCCAGCATGGTAGGTGGCTCAACGCTGCATGCCGCTGTCGCCTTTCATCTCGGCCCGAATCAAGGTCGCATCCAATCGTCCGCTCGGCCACCAAGCAGGAACGGTCGCCCGCTTCGCAGCAATGCCGCGAGCGACTTCAACCCTTCGACCTGAGATCAGACAAGACCACCCGC…	k__Fungi(100);unclassified(100);unclassified(100);unclassified(100);unclassified(100);unclassified(100);unclassified(100);
Otu0237	3	0	0	0	0	0	0	0	0	0	M03053_189_000000000-D2L8J_1_1101_17607_19913	ATAAGTAATGCGAATTGCAGAATTTCCGTGAGTCATCGAATCTTTGAACGCACATTGCGCCCATTGGTATTCCGATGGGCATGCCTGTTCGAGCGTCATTATCCTCCCTCAAACCTCGGGTTTGGTGTTGGGCCGCGCTGGTTCTTCGTAACCAGCTGGCCTCAAAGACAGTGACGGCGTCCGTGGGACCCTCGGTGCAACGAGCTTTTCAGGAGCACGCGTCGAGTTTCAAGGACCTTTCGGGCCCGGTCTCCCTTTTTACTTCCACAAGGTTGACCTCGGATCAGGTAGGAATACCCGCTGAACTTA	k__Fungi(100);p__Ascomycota(100);unclassified(100);unclassified(100);unclassified(100);unclassified(100);unclassified(100);
Otu0238	0	0	2	0	0	0	0	0	0	1	M03053_189_000000000-D2L8J_1_1101_23865_11286	ATAAGTAATGTGAATTGCAGAATTCCGTGAATCATCGAATCTTTGAACGCACATTGCGCCCCCTGGCATTCCGGGGGGCATGCCTGTCCGAGCGTCATTTGCACAACTCAAGCCCGGCTTGTGTGTTGGGCCATCGTCCCCGCGTGCCACCGCGCGGCGGGGACGGGCCCGAAAGGCAGTGGCGGCATTGTGGTTTGCGCAATCAGCCCGAGCGTATGGGGCTCTGTCATCACGCTTGCGGCGCGAAACCGACGTCTGCCTCACCGATCCATCGCGGATCTCCTCTCTTCTTAAGGTTGACCTCGGATCAGGTAGGGATACCCGCTGAACTTA	k__Fungi(100);p__Ascomycota(100);c__Eurotiomycetes(100);unclassified(100);unclassified(100);unclassified(100);unclassified(100);
Otu0239	0	0	0	0	0	3	0	0	0	0	M03053_189_000000000-D2L8J_1_1101_21718_20014	AAAAGTAATGTGAATTGCAGATTTTGTGAATCATCGAGTCTTCGAACGCACCTTGCGCTCTCGGGCATTCCCGGGAGCATGCCTCTTTGAGTGTCATTTAACCTCTCAATCTCTGATTGGAATTGGGCTGCTAGCGGCGGCCTGAAAGATAGAGTCTCTGTTGAGCGTGCTAAGCGTGAGCTTCGCAGGACTTGGCTTCGGCAAATATCACTTCTGATCTCAAATGAGGCAAGACTACCCGCTGAACTTA	k__Fungi(100);unclassified(100);unclassified(100);unclassified(100);unclassified(100);unclassified(100);unclassified(100);
Otu0240	0	0	2	0	0	0	0	0	0	0	M03053_189_000000000-D2L8J_1_1101_25502_22618	ATAAGTAATGTGAATTGCAGAATTCAGTGAACCATCGAATCTTTGAACGCACATTGCGCCCGCCAGTATTCTGGCGGGCATGCCTGTTCGAGCGTCATTTCAACCCTCAAGCCCCCGGGCTTGGTGTTGGGGATCGGCACAAGGCGCTGGCACCTCCGGGAGCCGCGCGCGCCCGCCGTCCCCCAAATCCAGTGGCGGTTCGCGCCGTGTGTACCTCAGCGTAGTAGCAACGACTCGCTCCGGGACCCTCCTGCGAACCACGCCGTAAAACCCCCGACTTTTTTTCTGGTTGACCTCGAATCAGGTAGGACTACCCGCTGAACTTA	k__Fungi(100);p__Ascomycota(100);c__Sordariomycetes(100);o__Hypocreales(100);f__Nectriaceae(100);g__Cylindrocarpon(100);s__Cylindrocarpon_sp(100);
Otu0241	0	0	2	0	0	0	0	0	0	0	M03053_189_000000000-D2L8J_1_1102_7141_17793	ATACGTAATGTGAATTGCAGAATTCAGTGAATCATCGAATCTTTGAACGCACATTGCGCCCGCCAGTATTCTGGCGGGCATGCCTGTTCGAGCGTCATTTCAACCCTCAAGCCTGGCTTGGTGTTGGAGTTCTGTTTGTTTAAAACAGGCTCTGAAATACAGTGGCGAGCTCACCTGGACTCCGAGCGTAGTAGTTAACGTCGCTCAGGGCGTCCGTCGGGTTTCTGCCGTAAAATCCCCTATTTTACAGAAAGGTTGACCTCGGATCAGGTAGGAATACCCGCTGAACTTA	k__Fungi(100);p__Ascomycota(100);c__Sordariomycetes(100);unclassified(100);unclassified(100);unclassified(100);unclassified(100);
Otu0242	2	0	0	0	0	0	0	0	0	0	M03053_189_000000000-D2L8J_1_1102_9510_7889	ATAAGTAATGCGAATTGCAGAATTTCAGTGAGTCATCGAATCTTTGACCGCACATTGCGCCCTTTGGTATTCCGAAGGGCATGCCTGTTCGAGCGTCATTCTCAACCCTCAAGCCCCGTCGGGGTTTGGTTTTGGATGGCTTGGTCGGTCAAAACGACCCATCCTAAAGACAATGACGGCGGTGGATGTGATTGCACCCGGTACACTGAGCTTCTTTATTGAGCATGTATCAGGACGCAGCCGAACCTCCGGTCTTCTCCCTCTCGGGAACTTTTTTTTACAAGATTGACCTCGAATCAGGTAGGAATACCCGCTGAACTTA	k__Fungi(100);p__Ascomycota(100);unclassified(100);unclassified(100);unclassified(100);unclassified(100);unclassified(100);
Otu0243	2	0	0	0	0	0	0	0	0	0	M03053_189_000000000-D2L8J_1_1101_22934_7442	ATAAGTAGTGTGAATTGCAGAATTCAGTGAATCATCGAATCTTTGAACGCACATTGCGCTTCCTGGTATTCCGGGGAGCATGCTCGTTTCAGAATCAATATGTTCTCACAAACTATATGGGTTGCAAAACCCCTATTGGGCGTGGATTTGGGCATTTTTGCTATGGTGCCTTTGTGCAACATGGCAATTGCCTTAAAATGATTGCGTGTATGCCCCAATTGGTAGTAATTGGTTTACCCTCAATGCAACAGTCAAATGAAACATTTTGGGGGACCTTTTGTGAACATTGGACTTGGAATACACTTCCATTCTATACAGCAACCGTCTCTAGTATTGAGATTGTTTCTGAACCTTGGTCTGAAATCGAGCAAGAAAACCCGCTGAACTTA	k__Fungi(100);p__Chytridiomycota(100);c__Chytridiomycetes(100);o__Spizellomycetales(100);f__Spizellomycetaceae(100);g__Powellomyces(100);s__Powellomyces_hirtus(100);
Otu0244	1	1	0	0	0	0	0	0	0	0	M03053_189_000000000-D2L8J_1_1101_23527_18477	ATAAGTAGTGTGAATTGCAGAATTCAGTGAATCATCGAATCTTTGAACGCACATTGCGCTTCCTGGTATTCCGGGGAGCATGCCCGTTTCAGAATCATTACAATCTCACAACCCCTTTGCTTTCGAGCTTAGGGCAAGTGGATGTGGATGCTTTGCGCTTTAGCAATCATCTTAAAATGATAGTGTGTGCCCCAGTCAGTCTGATTGGTAAACCAAAGTGCAACAGATTTATCTATTACGCTCTGGCTTTCGAATCTGGACTTGTTGGGATTCCTACTCAAATTCTTAACAGTCGCCACGTCAAATGATGTGGTTCCTGATAACTTGGTCTGAAATCGGGCAAGAAAACCCGCTGAACTTA	k__Fungi(100);p__Chytridiomycota(100);c__Chytridiomycetes(100);o__Spizellomycetales(100);f__unclassified_Spizellomycetales(100);g__unclassified_Spizellomycetales(100);s__Spizellomycetales_sp(100);
Otu0245	0	0	0	0	0	0	2	0	0	0	M03053_189_000000000-D2L8J_1_1102_3829_12397	ATACGTAATGTGAATTGCAGAATTCAGTGAATCATCGAATCTTTGAACGCATATTGCGCTCTTTGGTATTCCGAAGAGCATGCTTGTTTGAGTATCAGTAAACACCTCAACCTCCTCTTGATTTTTCAAAAGGAGGGTGGACTTGAGCTATCCCAACAACCTTTATCGGTCGGCGGGCGGCTTGAAATGCAGGTGCAGCTGGACTTTTCTCTGAGCTATAAGCATATCTATTTAGTCTGCCTCAAAACAGATTATTACCTTTGCTGCAGCTAACATAAAGGAGATTAGTTCTTGTGCTGACTGATGCAGGATTCACAAAGACCGCTTCGGCTGTCTTTGTAAACTCGATCTCAAATCAAGTAAGACTACCCGCTGAACTTA	k__Fungi(100);p__Zygomycota(100);c__Mortierellomycotina_cls_Incertae_sedis(100);o__Mortierellales(100);f__Mortierellaceae(100);g__Mortierella(100);unclassified(100);
Otu0246	2	0	0	0	0	0	0	0	0	0	M03053_189_000000000-D2L8J_1_1102_18521_8530	ATAAGTAATGTGAATTGCAGAATTCCGTGAATCATCGAATCTTTGAACGCACATTGCGCCCTCTGGTATTCCGGGGGGCATGCCTGTCCGAGCGTCATTGCAACCCCTCAAGCACGGCTTGTGTTATGGGCGGACGTCCCCTTAGCCGGTGGACGGGCCCCAAATGCAGTGACCGAGGCCATGATTCCGGCGCCCGAGCGAATGGGATTTCCACCAGCTCTAGTGGCCCGGCCGGTCCTCAGGTCCCGACCAATTTCATTTCAAGGTTGACCTCGGATCAGGTAGGGATACCCGCTGAACTTA	k__Fungi(100);p__Ascomycota(100);c__Eurotiomycetes(100);o__Onygenales(100);f__Onygenales_fam_Incertae_sedis(100);g__Arthropsis(100);s__Arthropsis_hispanica(100);
Otu0247	0	0	2	0	0	0	0	0	0	0	M03053_189_000000000-D2L8J_1_1102_19122_12929	ATAAGTAGTGTGAATTGCAGACTTTAGTGAATCATCGAATCTTTGAACGCACATTGCGCCCCTTGGTATTCCATTGGGCATGCCTGTTCGAGCATCATTTACACCCTCAAGCTACGCTTGGTGTTGGGCGTCTGTCCCTGCTTTACGCAAGGACTCGCCCCAAATTTATTGGCAGCGGCATTGTCGGCTTCTTGCGCAGCACTTCGCGCCTTGAAGATCCCCGGCGGGCTTGCGTCCACTAAGAAACCCCCCAGTTTGACCTCGAATCAGGTAGGGATACCCGCGGAACTTA	k__Fungi(100);p__Ascomycota(100);c__Dothideomycetes(100);o__Pleosporales(100);unclassified(100);unclassified(100);unclassified(100);
Otu0248	2	0	0	0	0	0	0	0	0	0	M03053_189_000000000-D2L8J_1_1102_7319_20142	ATAAGTAGTGTGAATTGCAGAATTCAGTGAATCATCGAATCTTTGAACGCACATTGCGCTTCCTGGTATTCCGGGGAGCATGCCCGTTTCAGAATCATTAAAATCTCACCAGGGTTGAGCTTTTCGGAGCGCAGCTTTTTGAGTGGATTTGGATGTTTTGTTTCGACAATCATCTCAAAATGATAGTGTGTGCATCCATCGAACGTTCGATGGGTTACCAAAGTGCAACAGATTTTTCTATTTCGCTTTGGGAGCTTATTGAATTGGATGGGAGCATATACCCAACTTCTTAACAAACGTCTTGCCCTTGGGTGAAACATTTGATAACTTGGTCTGAAATCGGGCAAGAAAACCCGCTGAACTTA	k__Fungi(100);p__Chytridiomycota(100);c__Chytridiomycetes(100);o__Spizellomycetales(100);f__Spizellomycetaceae(100);g__Spizellomyces(100);s__Spizellomyces_pseudodichotomus(100);
Otu0249	2	0	0	0	0	0	0	0	0	0	M03053_189_000000000-D2L8J_1_1102_6331_17862	ATAAGTAATGTGAATTGCAGAATTCCGTGAATCATCGAATCTTTGAACGCATATTGCGCCCTCCGGCATTTCGGGGGGCATGCCTGTCCGAGCGTCATTGCAACCCTCAAGCGCGGCTTGTGTGTTGGGCCTTCGTCCCCCGTGGACGGGCCCAAAAGGCAGTGGCGGTGCCGCGGTCCGGTGCCCGAGCGTATGGGTTTTTTGACACCCGCTCCGGGGGCCCGGCCGGCGCTGGCCGATCGAACGATTTCTTCCAGGTTGACCTCGGATCAGGTAGGGATACCCGCTGAACTTA	k__Fungi(100);p__Ascomycota(100);unclassified(100);unclassified(100);unclassified(100);unclassified(100);unclassified(100);
Otu0250	2	0	0	0	0	0	0	0	0	0	M03053_189_000000000-D2L8J_1_1101_18124_13483	ATAAGTAATGTGAATTGCAGAATTCAGTGAATCATCGAATCTTTGAACGCACCTTGCGCTCCTTGGCATTCCGAGGAGCATGCCTGTTTGAGTGTCATTAAATCCTCAACCTCATCTCCCTTGTGGTGAATTGGGTGTTGGACGTGGAAGCTGCTGGCTTGTTAAAGTCGGCTCTTCTGAAATGCATTAGCAGGGCCACGCTGTGCGGCTTGGTATTGATAGTTGTCTTACCAGGTAGCAAGTTAGTCCAGCTTCGAGCCGTCTCTTCAGAGACAACATTGACGATTTGACCTCAAATCAGGTAGGACTACCCGCTGAACTTA	k__Fungi(100);p__Basidiomycota(100);c__Agaricomycetes(100);o__Agaricales(100);f__Pluteaceae(100);g__Pluteus(100);unclassified(100);
Otu0251	0	2	0	0	0	0	0	0	0	0	M03053_189_000000000-D2L8J_1_1102_17091_18772	ATAAGTAATGTGAATTGCAGAATTCAGTGAATCATCGAATCTTTGAACGCACATTGCGCCCTCTGGTATTCCGGGGGGCATGCCTGTTCGAGCGTCATTACAACCCTCAAGCTCTGCTTGGTATTAGGCTTCACCCTTAGGGGCGGGCTTTAAAATCAGTGGCGGTGCCATTTGGCTTCAAGCGTAGTAATTCTTCTCGCTTTGGAGGACTAGTGAGCGCCTGCCAGCAACCCCAATTTTTAAAGGTTGACCTCGGATCAGGTAGGGATACCCGCTGAACTTA	k__Fungi(100);p__Ascomycota(100);unclassified(100);unclassified(100);unclassified(100);unclassified(100);unclassified(100);
Otu0252	0	0	2	0	0	0	0	0	0	0	M03053_189_000000000-D2L8J_1_1101_25772_10801	ATAAGTAGTGTGAATTGCAGAATTCAGTGAATCATCGAATCTTTGAACGCACATTGCGCCCCTTGGTATTCCATGGGGCATGCCTGTTCGAGCGTCATCTACACCCTCAAGCTCTGCTTGGTGTTGGGCGTCTGTCCCGCCTTCGCGCGCGGACTCGCCCCAAATTCATTGGCAGCGGTCCTTGCCTCCTCTCGCGCAGCACAATTGCGTCTGCGGGGGGGCGTGGCCCGCGTCCACGAAGCAACATTACCGTCTTTGACCTCGGATCAGGTAGGGATACCCGCTGAACTTA	k__Fungi(100);p__Ascomycota(100);c__Dothideomycetes(100);o__Pleosporales(100);f__Montagnulaceae(100);unclassified(100);unclassified(100);
Otu0253	0	2	0	0	0	0	0	0	0	0	M03053_189_000000000-D2L8J_1_1102_13601_12953	ATAAGTAATGTGAATTGCAGAATTCCGCGAATCATCGAATCTTTGAACGCACATTGCGCCCACCAGCACTCTGGTGGGCATGCCTGTCCGAGCGTCATTTCACCCCTCGAAGCCCCCTGGGGCTCCGGTGCTGGGGCGCTACAGAGCGGGCTCGCCCCGCGCTGTAGGCTCCGAAACGCAGTGGCGGCCTCGCCGAGACCCCGAGCGCAGTAAACGCACAGCGCCTCGCTCAGGGCGTCCGGCGGGTGCCCAGGCCGTGAAACCCCCCAACCTCCACAAGGTTGACCTCGGATCAGGTAGGAATACCCGCTGAACTTA	k__Fungi(100);p__Ascomycota(100);unclassified(100);unclassified(100);unclassified(100);unclassified(100);unclassified(100);
Otu0254	0	0	2	0	0	0	0	0	0	0	M03053_189_000000000-D2L8J_1_1102_14806_15625	ATAAGTAATGTGAATTGCAGAATTCAGTGAATCATCGAATCTTTGAACGCACCTTGCGCTCTTTGGTATTCCGAAGAGCATGCCTGTTTGAGTGTCATTAAATTCTCAACTTCATCAGTTTGTTAAAGACTCGATTGAAGCTTGGATGTGGAGGTGTTGCAGGTCCGTCGCCGGTCTGCTCCTCTGAAATGTATTAGCGTGTTAAGCTGCCTGTCTATTGGTGTGATAATTATCTACATCGTGGACTAGGATTGGCGAAATAATTGACCCAGCTTCTAATCGTCCACGAGGACAATTACTTGACAAACTTGACCTCAAATCAGGTAAGACTACCCGCTGAACTTA	k__Fungi(100);p__Basidiomycota(100);c__Agaricomycetes(100);o__Agaricales(100);f__Psathyrellaceae(100);g__Coprinopsis(100);unclassified(100);
Otu0255	0	2	0	0	0	0	0	0	0	0	M03053_189_000000000-D2L8J_1_1102_7919_12534	ATAAGTAATGTGAATTGCAGAATTCAGTGAATCATCGACTCTTTGAACGCACCTTGCGCTCCTTGGTATTCCGAGGAGCATGCCTGTTTGAGTGTCATTAAATTCTCAACCTCTCTAGTTTTTATTAACTAGTAGATGGCTTGGATTTGGAGGTTTTTTGCAGGCTTTCACAAGTCAGCTCCTCTTAAATGTATTAGCCGGTGCCCTCTAACCGTCTATTGGTGTGATAATTATCTACGCCGTGGACTATTAGACTTGGTTGCATTGCTTCTAATCGTCCTGTATGGGACAATATATTGACATTTTGACCTCAAATCAGGTAGGACTACCCGCTGAACTTA	k__Fungi(100);p__Basidiomycota(100);c__Agaricomycetes(100);o__Agaricales(100);f__Strophariaceae(100);unclassified(100);unclassified(100);
Otu0256	0	0	0	2	0	0	0	0	0	0	M03053_189_000000000-D2L8J_1_1102_9870_20050	ATAAGTAATGTGAATTGCAGAATTCAGTGAATCATCGAATCTTTGAGCGCACCTTGCGCTCCTTGGTATTCTGAGGAGCATGCCTGTTTGAGTATCATGAAATTCTCAACCTTTTCTAGCTTTTGCAAGCTAGATTGGGCTTGGATTATGGAAGTTGCTGGCTTGTTTGAAGCCAGCTCTTCTAAAATGCATTAGCAAAAGATCATTGCTGCTTATCATTTGGTATGATAATTATTTATACCATTGTGAGTTGGCATTTCATTTGCTTCTAACTGTCTCTATTATGAGGGACAAATTTGATAATTTTGATCTCAAATCAGGTAGGACTACCCGCTGAACTTA	k__Fungi(100);p__Basidiomycota(100);c__Agaricomycetes(100);o__Agaricales(100);f__Entolomataceae(100);unclassified(100);unclassified(100);
Otu0257	0	2	0	0	0	0	0	0	0	0	M03053_189_000000000-D2L8J_1_1101_20593_4894	ATACGCAATGCGAATTGCAGAACCGCGAGTCATCAGATCTTTGAACGCAAGTGGCGATAGCTTCGGCTATCATGTTTATTTCAGTGTGCCCGGTTAATTACATCATAGAATATAATGTGATTGAAGAATATTCTCTCACAAAATATGGAATAATGTCAATGAAGACTCTAAACGAACTAGTCACTAACAGGTGATAATCGTTTAAGGGATTGGAATTGGTGAATCATTATTCAAAAATTATATTATCCAATTATGACACCTGAAATAAGCAAGAATACCCGCTGAACTTA	k__Chromista(100);p__Ciliophora(100);c__unclassified_Ciliophora(100);o__unclassified_Ciliophora(100);f__unclassified_Ciliophora(100);g__unclassified_Ciliophora(100);s__Ciliophora_sp(100);
Otu0258	2	0	0	0	0	0	0	0	0	0	M03053_189_000000000-D2L8J_1_1101_16904_19880	ATAAGTAGTGTGAATTGCAGAATTCAGTGAATCATCGAATCTTTGAACGCACATTGCGCCCTTTGGTATTCCTTAGGGCATGCCTGTTCGAGCGTCATCTAAACCCTCAAGCTCTGCTTGGTGTTGGGCGCCTGTCCCGCCTCGGGCGCGGACTCGCCTCAAAAGCATTGGCGGCCTGTGTATTGGCTTCGAGCGCAGCAGACTCGCGCCTCGCAACCCTCTGGCACGGGCGTCCATCAAGACGCACCCCCAAAGTTTGACCTCGGATCAGGTAGGGATACCCGCTGAACTTA	k__Fungi(100);p__Ascomycota(100);c__Dothideomycetes(100);o__Pleosporales(100);f__Lophiostomataceae(100);unclassified(100);unclassified(100);
Otu0260	2	0	0	0	0	0	0	0	0	0	M03053_189_000000000-D2L8J_1_1101_28472_10352	ATAAGTAATGTGAATTGCAGAATTCCGTGAATCATCGAATCTTTGAACGCACATTGCGCCCACCAGTACTCTGGTGGGCATGCCTGTCCGAGCGTCATTTCGACCCTCGAGCCTCCCTCTGTGGTGGTTCGGTGCTGGGACGCTACAGCGCGCTTGCCCGTGCTGTAGGCCCCGAAATGCAGTGGCGGCCTCGCCGAGACCCCGAGCGCAGTAAACCGTGCCCTAGCACAGCGCCTCGTTCAGGGTGTCCGGCGGGTGCCCCGGCCGTAAAACCCCCTAATTTATAGAAGGTTGACCTCGGATCAGGTAGGAATACCCGCTGAACTTA	k__Fungi(100);p__Ascomycota(100);unclassified(100);unclassified(100);unclassified(100);unclassified(100);unclassified(100);
Otu0261	0	2	0	0	0	0	0	0	0	0	M03053_189_000000000-D2L8J_1_1101_19043_12559	ACAAGTAATGTGAATTGCAGAATTCCGTGAATCATCGAATCTTTGAACGCACATTGCGCCCTCTGGTATTCTGGAGGGCATGCCTGTCCGAGCGTCATTGCTATACCTCAAGCCCGGCTTGTGTGATGGACTCACTGTCTAATTGGACAGTAGCCCCAAAGGCAGTGGCAGGGTCGCAGTCCGGTCTTTTAAATGCGTATGGGGCATTGTCACCCGCTTGAAAGCTGGCCGACCCTTTAAGCCTATTGTGAGAGAAATCCACAATTGTTTTAATATTTCCTGATGGACCTCGGATCAGGTAGGGATACCCGCTGAACTTA	k__Fungi(100);p__Ascomycota(100);c__Eurotiomycetes(100);o__Eurotiales(100);f__Elaphomycetaceae(100);g__unclassified_Elaphomycetaceae(100);s__Elaphomycetaceae_sp(100);
Otu0262	0	2	0	0	0	0	0	0	0	0	M03053_189_000000000-D2L8J_1_1102_5956_16739	ATAAGTAATGCGAATTGCAGAATTCAGTGAATCATCGAATCTTTGAACGCACATTGCGCCCATTAGTATTCTAGTGGGCATGCCTGTTCGAGCGTCATTACAACCCTTACGCCCTGGTTGCGTAGTGTTGGGACCTTACCGCCCCCCGGCGGTAACTCCCTAAAGTCAGTTGGCAGAGTCACGGCGTGCTCTAAGCGTAGTAATCATCTTCTCGCTTCTGAAGCCGTCGCGGCGATCGCCAGAAAACCCCTATAGTTTCTAGTGGTTGACCTCGGATCAGGTAGGAATACCCGCTGAACTTA	k__Fungi(100);p__Ascomycota(100);c__Sordariomycetes(100);o__Xylariales(100);f__Xylariaceae(100);g__Calceomyces(100);s__Calceomyces_lacunosus(100);
Otu0263	0	0	0	0	0	0	2	0	0	0	M03053_189_000000000-D2L8J_1_1101_24531_9942	ATACGTAATGTGAATTGCAGAATTCAGTGAATCATCGAATCTTTGAACGCACATTGCGCCCTCTGGTATTCCGGGGGGCATGCCTGTTCGAGCGTCATTATAACCACTCAAGCTCTCGCTTGGTATTGGGGTTCGCGGTTCCGCGGCCCCTAAAATCAGTGGCGGTGCCTGTCGGCTCTACGCGTAGTAATACTCCTCGCGATTGAGTCCGGTAGGTCTACTTGCCAGCAACCCCCAATTTTCACAGGTTGACCTCGGATCAGGTAGGGATACCCGCTGAACTTA	k__Fungi(100);p__Ascomycota(100);unclassified(100);unclassified(100);unclassified(100);unclassified(100);unclassified(100);
Otu0264	2	0	0	0	0	0	0	0	0	0	M03053_189_000000000-D2L8J_1_1101_23459_15666	ATAAGTAATGTGAATTGCAGAATTCAGTGAATCATCGAATCTTTGAACGCACATTGCGCCCCTTGGTATTCCAGGGGGCATGCCTGTTCGAGCGTCATTATCACCACTCAAGCCCGGCTTGGTATTGGGGCACGCCGTCACCGGCCGCCCCTAATCTCAGTGGCGAGGACCCCTTCCACCCAGACGCAGTCACCGCTCGTCTCGGGGGCGCGGGCCCGCGACCAGAAACCTCTCACGGTTGACCTCGGATCAGGTAGGAATACCCGCTGAACTTA	k__Fungi(100);p__Ascomycota(100);unclassified(100);unclassified(100);unclassified(100);unclassified(100);unclassified(100);
Otu0265	0	2	0	0	0	0	0	0	0	0	M03053_189_000000000-D2L8J_1_1102_10292_15029	ATACGTAATGCGAATTGCAGAATTCCAGTGAGTCATCGAATCTTTGAACGCACATTGCGCCCTTTGGTATTCCGAAGGGCATGCCTGTTCGAGCGTCATTATCACCCCTCAAGCCCTGTGCTTGGTGTTGGACGGCCTGGTCGAGCCACGCTCGACCCCTCCTAAAGACAATGACGGCGGCCTGTGGTTCCCCCGGTACACTGAGCTTTTTACTGAGCACGTATTGGATAAGGGCGCCCGGGACACGGTCCTCTCCTTTCACTAGGAAACTTTCCAAAGGTTGACCTCGGATCAGGTAGGAATACGCGCTGAACTTA	k__Fungi(100);p__Ascomycota(100);c__Eurotiomycetes(100);o__Chaetothyriales(100);f__Herpotrichiellaceae(100);g__Cladophialophora(100);unclassified(100);
Otu0266	2	0	0	0	0	0	0	0	0	0	M03053_189_000000000-D2L8J_1_1102_13265_14498	ATACGTAATGTGAATTGCAGAATTCAGTGAATCATCGAATCTTTGAACGCACATTGCGCCCCTTGGTATTCCATGGGGCATGCCTGTTCGAGCGTCATTTGTACCCTCAAGCTCTGCTTGGTGTTGGGTGTTTGTCCCGCCTCGGCGTGTGGACTCGCCTCAAAGCAATTGGCAGCCGGCGTATTGGCCTGGGAGCGCAGCACAATTTTGCGTTCTCGACCTCATTACAGCGGCGTCCATGAAGCCCATTTTATCACTTTTGACCTCGGATCAGGTAGGGATACCCGCTGAACTTA	k__Fungi(100);p__Ascomycota(100);c__Dothideomycetes(100);o__Pleosporales(100);unclassified(100);unclassified(100);unclassified(100);
Otu0267	0	2	0	0	0	0	0	0	0	0	M03053_189_000000000-D2L8J_1_1101_19408_14063	ATAAGTAATGCGAATTGCAGAATTCAGTGAGTCATCGAATCTTTGAACGCACATTGCGCCCTGTGGTATTCCGCAGGGCATGCCTGTTCGAGCGTCATTTCAACCCTCAAGCTCTGCTTGGTGTTAGGCCATGCCCTCGTGGCCGGCCCCAAAGCCAGTGGCGGTGCCGTCCGGCTCTAAGCGTAGTACATCTCTCGCTCTAGGGTCCGGCGGTTGCCTGCCAGAACACAAACTCTTATGGTTGACCTCGGATCAGGTAGGGATACCCGCTGAACTTA	k__Fungi(100);p__Ascomycota(100);c__Leotiomycetes(100);o__Leotiomycetes_ord_Incertae_sedis(100);f__Myxotrichaceae(100);g__Oidiodendron(100);unclassified(100);
Otu0268	0	2	0	0	0	0	0	0	0	0	M03053_189_000000000-D2L8J_1_1102_9390_10169	ATACGTAGTGTGAATTGCAGAATTCCGTGAACCATCGAATCTTTGAACGCATATTGCGCTCGAGCCCTCGGTCAAGAGCATGTCTGCCTCAGCGTCGGTTTACACCCTCACCCCTCCCTTACTGGGTGTGTTTGCTCAGTTTGCAAGCCATTGGGGTGGCTCTGGCTTCCCCAATCAAGCCGTTTCACTGCGGCAGGTTGGGTTGGCTGAAGTGCAGAGGCTTAAGCAAGGACCCGATATGGGCTTCAACTGGATAGGTAGCACCGGCTTCTGCCGACTACACGAAGTTGTTGCTTGTGGATCTTGCTAGGAGCCAAGCAGGAACGTGCCTTTGGCATGTCTAAACTTTCGACCTGAGCTCAGGCAAGATTACCCGCTGAACTTA	k__Fungi(100);unclassified(100);unclassified(100);unclassified(100);unclassified(100);unclassified(100);unclassified(100);
Otu0269	0	2	0	0	0	0	0	0	0	0	M03053_189_000000000-D2L8J_1_1102_9569_15757	ATACGTAATGCGAATTGCAGAATTCAGTGAATCATCGAATTTTTGAACGCAAATTGCGCTCTCGGGATAGGCCTGAGAGCATGTTTCTTTGAGCCTCGTGTCTAAACCATCTCGGCTGCGTGCCGGAAAATGAAAGTCCCATTATCCATGGAGCGTGGGTCTTTTTAAGCTCATTGAAGCCATGGCTAGCATCCGCCTTGAGAAGTTCCTTCTGCAGAGCGGCGCGATTAACAAGTTTAACTTTTTCTCTCGCTTCTTTGTGTTGGATCATCCGCTGCCGGTGAAAGTCATTGCTCAGTAACGGAAAACCCTTTTTGACTTAGAGCTCAAATGAAGCAAGAGAACCCGCTGAACTTA	k__Fungi(100);unclassified(100);unclassified(100);unclassified(100);unclassified(100);unclassified(100);unclassified(100);
Otu0270	0	2	0	0	0	0	0	0	0	0	M03053_189_000000000-D2L8J_1_1101_24921_11683	ATACGTAGTGTGAATTGCAGAATTCCGTGAACCATCGAATCTTTGAACGCATATTGCGCTCGAGCCCTCGGGCAAGAGCATGTCTGCCTCAGCGTCGGTTTACACCCTCACCCCTCCCAACTTGTTGGGTATGTTTGCTTTTTTTGCAAGCCACAGGGGTGGATCTGGCTTCCCCAATCAGCCATCAGGTAGATTGGGTTGGCTGAAGTACAGAGGCTTAAGCAAGGACCCGATATGGGCTTCAACTGGATAGGTAGCACCGGCTTTTGCCGACTACACGAAGTTGTTGCTTGTGGATCTTGCTAGAAGCCAAGCAGGAATGTGCCTTTGGCATATCTTAACTTTCGACCTGAGCTCAGGCAAGATTACCCGCTGAACTTA	k__Fungi(100);unclassified(100);unclassified(100);unclassified(100);unclassified(100);unclassified(100);unclassified(100);
Otu0271	0	0	0	2	0	0	0	0	0	0	M03053_189_000000000-D2L8J_1_1102_3640_16878	ATACGTAGTGTGAATTGCAGAATTCCGTGAATCATCGAATCTTTGAACGCATATTGCGCTCGAGGCCTCGGCCAAGAGCATGTCTGCCTCAGCGTCGGTTTATCCCCTCATCCCCCTTCCTTCTGGAAGCTTTATCCATGCCTTTGCATTGGTAATTGGGGGTGGATCTGGCCTCCCCAATAAGCTTATTGTTGATTGGGTTGGCCGAAGCATAGAGGCTTGAGCATGGACCCGTATGGGCATCAACTGGATAGGTAGAAATGGCCTCGGCCAACTACACGAAGTTGTTGCTTGTGGACTTTGCTGGAGGCCAAGCAGGAAGCACGCTTCGGTGTGTATACCTTAAACATTCGACCTGAGCTCAGACAAGATTACCCGCTGAACTTA	k__Fungi(100);unclassified(100);unclassified(100);unclassified(100);unclassified(100);unclassified(100);unclassified(100);
Otu0272	2	0	0	0	0	0	0	0	0	0	M03053_189_000000000-D2L8J_1_1101_23950_24683	ATACGTAATGTGAATTGCAGAATTCCGTGAACCATCAAATCTTTGAACGCATATTGCGCTCGAGGCTTCGGCCGAGAGCATGTCTGCCTCAGCGTCGGTATTACCCCTCGCTTCTCAACCCCTGGTTGATGCCTGCCTGCCTTTGCAGTTGGCTAGAAGCGGATCTGGCTTTCCCAATTGCCTTTGGTAGTTGGGTCAGCTGAAGCACAGAGGCTTGAGCAAGGACCCTTATTGGGCTTCAACTGGATAGGTAGAACTGGTCTTAGGACCAACTACACGAAGTTGTTGCTTGTGGTCTTTGTCTGGAGGCCAGCAGGAAACCTTTATACCTTCGACCTGAGCTCAGGCAAGATTACCCGCTGAACTTA	k__Fungi(100);unclassified(100);unclassified(100);unclassified(100);unclassified(100);unclassified(100);unclassified(100);
Otu0273	0	0	2	0	0	0	0	0	0	0	M03053_189_000000000-D2L8J_1_1102_17605_12772	ATACGTAATGTGAATTGCAGAATTCAGTGAATCATCGAATCTTTGAACGCACATTGCGCCCGCCAGTATTCTGGCGGGCATGCCTGTTCGAGCGTCATTTCAACCATCAAGCCCCGGGCTTGTGTTGGGGACCTGCGGCTGCCGCAGGCCCTGAAAACCAGTGGCGGGCTCGCTAGTCACTCCGAGCGTAGTAGTTACATCTCGCTCCGGGCGTGCTGCGGGTTCCGGCCGTTAAAAGCCTTTTACCCCAAGGTTGACCTCGGATCAGGTAGGAAGACCCGCTGAACTTA	k__Fungi(100);p__Ascomycota(100);c__Sordariomycetes(100);o__Sordariales(100);f__Chaetomiaceae(100);unclassified(100);unclassified(100);
Otu0274	0	0	2	0	0	0	0	0	0	0	M03053_189_000000000-D2L8J_1_1102_5413_24763	ATAAGTAATGTGAATTGCAGAATTCAGTGAATCATCGAATCTTTGAACGCACATTGCGCCCGCCAGTATTCTGGCGGGCATGCCTGTTCGAGCGTCATTTCAACCATCAAGCCCCAGGCTTGTGTTGGGGTCCTGCGGCTGCCGCAGGCCCTGAAAAACAGTGGCGGGCTCGCTGTCACACCGAGCGTAGTAATACATCTCGCTTTGGACGTGCGGCGGGTTCTTGCCGTTAAACACCCCCCTTCTCAAGGTTGACCTCGGATCAGGTAGGAATACCCGCTGAACTTA	k__Fungi(100);p__Ascomycota(100);c__Sordariomycetes(100);o__Sordariales(100);unclassified(100);unclassified(100);unclassified(100);
Otu0275	0	0	0	2	0	0	0	0	0	0	M03053_189_000000000-D2L8J_1_1102_8127_8029	ATAATTAGTGTGAATTGCAGATACCGTGAATCATCAAGTCTTTGAACGCACATTGCACTGCCTGGAACTCCGGGCAGTATACCTGTTTGAGTATCAGTAAACACTCCTAATAAATCTCCTTTTGTAAGGGTTATTAGGGATTTGAGTTATCATCTTTTACTGTTGTAACGGATGTGACTTTAAATGTAGTCGCTATCAGGTCTTTGACCTACATAACTAGCTGACAGAGTTAATGGGCTTTAGCCTGTCACTGTCTCCACTAGATATGCAAGGTGTATTGATATGATTAGTTTGAAACACACTACGGTATTTATTTACTGTGACTTTGATCTCAAATCAGGTAAGATTACCCGCTGAACTTA	k__Fungi(100);unclassified(100);unclassified(100);unclassified(100);unclassified(100);unclassified(100);unclassified(100);
Otu0276	0	0	2	0	0	0	0	0	0	0	M03053_189_000000000-D2L8J_1_1102_7466_18506	TACGTAGTATGAATTGCAGAATTCCGTGAACCATCGAATCTTTGAACGCATATTGCGCCCAAGACCTCGGTCGAGGGCATGTCTGCCTCAGCGTCGGTTTAACCCCCTCACACCCCTCTTGTTTGCTTAATGCAAGCAAGGGTCGGCTCAGCCTAGCTGCTGAGCCTGGGTGCGGATGTGGCTCTCCCACGCCTCTGTGCGTGGGTTGGCTGAAAAGCAGAGGCTAGCTCAAGGACCCGTCAAGGGCGCAACTGGATAGGTAGGCAGCGCTGCCTCACGGCGGCCAACTACACGAAGTTGTTGCCTGTGGACTTTGGGCCGGCCAGCAGGAAACGGTGTTTTTGCTTGGCTTTTTATAAGCTAGGCTAACCTACCGTATCACAACCATTCGACCTGAGC…	k__Fungi(100);unclassified(100);unclassified(100);unclassified(100);unclassified(100);unclassified(100);unclassified(100);
Otu0277	0	0	2	0	0	0	0	0	0	0	M03053_189_000000000-D2L8J_1_1101_23165_16475	ATAAGTAATGTGAATTGCAGAATTCAGTGAATCATCGAATCTTTGAACGCACATTGCGCCCTTTGGTATTCCACAGGGCACACCCGTTCGAGCGTCATTACAACACTCAGGCCACGCCTGGTATTGGGTGCCGCCCCGTCAAACGGGCGCTCCTCAAACCCCTCGGCGTCGCCGTCCGTCCTCAAACGCAGCGAGAAACACCTTTCGGCGTTGTAGAGGCGGGCCGTGACCGCCGGAACCACACAAATTCAAACGTTTGACCTCGGATCGGGTGGGGATACCCGCTGAACTTA	k__Fungi(100);unclassified(100);unclassified(100);unclassified(100);unclassified(100);unclassified(100);unclassified(100);
Otu0278	0	2	0	0	0	0	0	0	0	0	M03053_189_000000000-D2L8J_1_1101_17299_1827	ATAAGTAATGTGAATTGCAGAATTCAGTGAATCATCGAATCTTTGAACGCACATTGCGCCCCTTGGTATTCCGAGGGGCATGCCTGTTCGAGCGTCATTTCAACCCCTCAAGCTCAGCTTGGTGTTGGGCTGCGCCAGCGTGCTGGCGGGCCTTAAAATCAGTGGCGGTGCCGCGTGGGCTCCAAGCGTAGTAGCATCTCTCGCTCTGGGGACCCGGCGGTTGCCTGCCAGACAATCACTAAAAAAAACAAAAGGTTTGACCTCGGATCAGGTAGGGATACCCGCTGAACTTA	k__Fungi(100);p__Ascomycota(100);c__Leotiomycetes(100);o__Helotiales(100);f__Helotiales_fam_Incertae_sedis(100);g__unclassified_Helotiales_fam_Incertae_sedis(100);s__Helotiales_fam_Incertae_sedis_sp(100);
Otu0279	0	2	0	0	0	0	0	0	0	0	M03053_189_000000000-D2L8J_1_1101_27934_12733	ATAAATAATATGAATTGCAGAATTCAGCGAATCATCGAGTTTTTGAACGCACATTGCGCCCTCTGGTATTCCGGAGGGCATGTCCGACCGAGCGTCGCATCACCACTCAAGCTTTCGGCTTGGTGATGGGGATTGCGGGGAAAGAGCGTCGTTGCAACTCGCAACGCGCACATCTCGCAACCCCGAAATGCAGTGGCGGCCCCCAGCGCGGCTCCTCCTTAGCGCAGTAGAACTTACCGCTACGCTTCGGGACGCCTGGGTGGCCTGCCGTAAAACCGCAGACCTCAGCGTCACACCCTCTACAGGTTGGCCTCGGGTCGGACAAGATTACCCGCTGAACTTA	k__Fungi(100);p__Ascomycota(100);c__Pezizomycotina_cls_Incertae_sedis(100);o__Pezizomycotina_ord_Incertae_sedis(100);f__Pezizomycotina_fam_Incertae_sedis(100);g__Phragmocephala(100);s__Phragmocephala_stemphylioides(100);
Otu0280	0	2	0	0	0	0	0	0	0	0	M03053_189_000000000-D2L8J_1_1101_19123_4745	ATACGTAGTGTGAATTGCAGAATCCTGTGAATCATCGAATCTTTGAACGCATCTGGCGCTTCAGGGCATTCCCTGGAGCATGCCTGTTTGAGCATCAGCTATAACCCCTCTTGCGCACACTGTGCAAGGTGCAGGCTGGGTGTCACGCGCAGCAGTGCGGGTGTCGCCTGAAATGGAACACGAATGGTGGCGGAACCAACGTAGTCCCCCCCAAGGCATCGTGCGTGGTAGGCAGGAGGTGCCCAGCACCCACCGCATAACACATCGCACGGCGCCCCGGCGGCGGGCTTGGTCCCCCCACTAGAGCATAAACACTCTTCAGCAATGATCTCAAATCAGGCAAGACTACCCGCTGAATTTA	k__Fungi(100);unclassified(100);unclassified(100);unclassified(100);unclassified(100);unclassified(100);unclassified(100);
Otu0281	0	2	0	0	0	0	0	0	0	0	M03053_189_000000000-D2L8J_1_1102_18320_5474	ATAAGTAATGTGAATTGCAGAATTCAGTGAATCATCGAATCTTTGAACGCACATTGCGCCCGCTAGTATTCTCGCAGGCATGCCTGTTCGAGCGTCATTTCAACCCTCAAGCTCTGCTTGGTGTTGGGGACCCGCCGACCTCTCCGGAGAGGCGATCCCCTAAAGACAGTGGCGGACCTACTGGTGTCTTTCCCCTTGCGTAGTAGTTATCTCGCACTGGGACCCGGTGGTGTTCTAGCCGTTAAACCCCCAATTTTTATATGGTTGACCTCGGATCAGGTAGGAATACCCGCTGAACTTA	k__Fungi(100);p__Ascomycota(100);c__Pezizomycotina_cls_Incertae_sedis(100);o__Pezizomycotina_ord_Incertae_sedis(100);f__Pezizomycotina_fam_Incertae_sedis(100);g__Campylospora(100);s__Campylospora_parvula(100);
Otu0282	0	2	0	0	0	0	0	0	0	0	M03053_189_000000000-D2L8J_1_1102_13127_6479	ATACGTAGTGTGAATTGCAGAATTCCGCGAATCATCGAGTCTTTGAACGCAAGTTGCGCCCGAGGCTTGACCGAGGGCATTTCTGCCAGAGCGTCACCGCGACACCCACCAAACCACTCCAAGTGAGTGTGTTCGAGTGAAAGTGGCCATCCGAATGGGGCCGCCGCACCCCCCCGGGAGTAATTCGTTTCTCCTTGGGTTGGGCCGGCGGCAGATTGGGTCGGCTGAAATGGAGGGAATTTGGCCGCCGTGGCGACACAGCCCCCGCGATCAGGTGATCCAAGGCCCCCACCCCGGGTGGCCCTGGAACTCGAACGTGCGTGGGCCTGTGCCGCCCGGCCCGATGTGTTCCAAAGCAGGTCCCGCTCCGCTCCGCGGAGCGACGAACGTCACGCATCA…	k__Fungi(100);unclassified(100);unclassified(100);unclassified(100);unclassified(100);unclassified(100);unclassified(100);
Otu0283	0	2	0	0	0	0	0	0	0	0	M03053_189_000000000-D2L8J_1_1101_19889_11504	ATACGTAGTGTGAATTGCAGAATTCCGCGAATCATCGAGTCTTTGAACGCAAGTTGCGCCCGAGGCTTGACCGAGGGCATTTCTGCCAGAGCGTCACCGCGACACCCACCAAACCACTCCAAGTGAGTGTGTTCGAGTGAAAGTGGCCATCCGAATGGGGCCGCCGCACCCCCCCGGGAGTAATTCGTTTCTCCTTGGGTTGGGCCGGAGGAGGATTGGGCCGCCGTGGTGACACAGCCCGCGATCAGGTGATCCAGGTGTTCAAAAACCCGGAACTCAAACGTGCGCGTCGGCTGTGGCACCCAGTTGGTCGGACTCACAAGCAGGTCCCTACCGACACTCCGGCCTAAAAACCCGGACGATGGAGGAAGGAGAAAACTCGTCACGCATCAGACCTCT…	k__Fungi(100);unclassified(100);unclassified(100);unclassified(100);unclassified(100);unclassified(100);unclassified(100);
Otu0284	0	2	0	0	0	0	0	0	0	0	M03053_189_000000000-D2L8J_1_1102_14338_14903	ATACGTAATGCGAATTGCAGAATTCCGTGAATCATCAAATCTTTGAACGCAAGTGGCACTCCCATGTGAAAGGGTGGGAGTATGCGTGTTGGAGAGTTTTGAATGTGATGGGCGTGAAGCCTGATTGGTGGGAGGTTTTCGAGGGCAGTAAATGCGCATCGGAATCGCCTGAAGTTGAAGTGAGTACGCTTTCTGTATGTTGACTCGTATTAACGTGCAGGCAAAAAAGTATTCATTGCGACAGAAGAAGTTGACGCTATACGCGCAAACTCCTTCAACCTCATTCATACTACAAACAGAAAGTGAAACCTCCACCACGCAAGAGGACCCGCCGAATTTA	k__Fungi(100);unclassified(100);unclassified(100);unclassified(100);unclassified(100);unclassified(100);unclassified(100);
Otu0285	0	0	2	0	0	0	0	0	0	0	M03053_189_000000000-D2L8J_1_1102_9554_20595	ATAAGTAATGTGAATTGCAGAGTTCAGTGAATCATCGAATCTTTGAACGCACCTTGCACCCTTTGGTATCCCCAAAGGGTATGCTCGTTTGAGTGTCATTGTAACCTCACACTTCCGGTCTTCGGATTGGGAGCGGTGGACTTGGGTGTTGCCGCTTTACCGTGGCTCACCTTAAATGCATTAGTGCATCTCCGGATTGGACATAGTACAGCGTGATAGGTATCTTCGCTGGCACCTTACTTCAGAGGGTGGCTGATCCAGAGCGCTGTGCTTTCAAACCGTCTTCGGACAATGACTGACAACTTGGCCTCAAATCGAGTAGGACTACCCGCTGAACTTA	k__Fungi(100);p__Basidiomycota(100);c__Agaricomycetes(100);o__Sebacinales(100);f__Sebacinaceae(100);g__Sebacina(100);s__Sebacina_sp(100);
Otu0286	0	2	0	0	0	0	0	0	0	0	M03053_189_000000000-D2L8J_1_1102_11065_11713	ATAAGTAATGTGAATTGCAGAATTCAGTGAATCATCGAATCTTTGAACGCACCTTGCACCCTTTGGAATTCCAAAGGGTATGCTCGTTTGAGTGTCATTGTACTCTCACACTCTCCGATCCTTTGGATTTGGGGAGCGGTGGACTTGGGTGCTTGCTGCTTTCATTGTGGCTCACCTCAAATGTGTCAGTGCATCTCTTGATTGGACATAGTACGGCGTGATATGTGTCTTCGCCGGCACCTCATAAGAGGGTGGCTGATCAGGAGCTCTGTGCTTTCAAACTGTCTTCGGACAATCTCTGACAACTTGACCTCAAATCGAGTAGGACTACCCGCTGAACTTA	k__Fungi(100);p__Basidiomycota(100);c__Agaricomycetes(100);o__Sebacinales(100);f__Sebacinaceae(100);unclassified(100);unclassified(100);
Otu0287	0	2	0	0	0	0	0	0	0	0	M03053_189_000000000-D2L8J_1_1101_20902_25229	ATACGTAATGTGAATTGCAGAATTCAGTGAATCATCGAATCTTTGAACGCACATTGCGCCCGCCAGTATTCTGGCGGGCATGCCTGTCCGAGCGTCATTTCAACACTCGAGCCCCTCCGGGGGGTCGGCGTTGGGGATCGGCCCTCCTCCGCGGGGGCCGCCCCCGAAATGCAGTGGCGGTCTCGCCGCAGCCTCTCCTGCGCAGTAGTTTGCACACTCGCACCGGGAGCGCGGCGCGTCCACGGCCGTGAAACACCCAACTCCAGAAATGTTGACCTCGGATCAGGTAGGAATACCCGCTGAACTTA	k__Fungi(100);p__Ascomycota(100);c__Sordariomycetes(100);o__Hypocreales(100);f__Hypocreaceae(100);g__Hypocrea(100);s__Hypocrea_dacrymycella(100);
Otu0288	0	0	2	0	0	0	0	0	0	0	M03053_189_000000000-D2L8J_1_1102_16110_6033	ATACGCAGTGCGAATTGCAGAACGTGAGTCATCAGATCTTTGAACGCAAGTGGCGCCGGTTAGCAGCCGGCATGTGGGGCTCAGTGTGTATGGAAATCACAAACGCGAAATGTGGTTGAAGCGCCCTCTTACCAGGAAGCTTCTCCCCTTAAACGCAGCGGAGGCGACGCACTAATACCTTGCTCTACGAGCAGGGCAGGCAAGTGTCTTGTCACGGGATAAAACCTCCTCTCCGGAAGTAGTCACTAGCATCCTAGTGATCTACGGAAGGGAGCATGGACCGTGGCGCTCAAAAGGATGCTTGCTCTGTTTTGGTGCACCAAAAAATCGCCCCCGACAACCCACGTTATTGCCTCACAGCGATAACAACCTCCTCACACGACACCTGAGCTCCGCAAG…	k__Fungi(100);p__unclassified_Fungi(100);c__unclassified_Fungi(100);o__unclassified_Fungi(100);f__unclassified_Fungi(100);g__unclassified_Fungi(100);s__Fungi_sp(100);
Otu0289	0	2	0	0	0	0	0	0	0	0	M03053_189_000000000-D2L8J_1_1102_6211_16376	ATACGTAATGCGAATTGCAGAATTCAGTGAATCATCAAATCTTTGAACGCAAATTGCACTCTCGGGTATCCCCGGGAGTACGCCTCTTTCAGTATCGGTTCTATCCAATCTCGTCTGCGTTTTTAAGTAAGCGCCTGACGGAAATTGAGCGCCACACCATCGAACAGAAGTGTGATGCTTGAAAGATAGAAGCGAAGCTGTTCTCACGCTACAGTGACCTTTTCTTTTCCTCTCTCCTGAGAGGAAACGAAGAGCAAACTGAGTGACGTGGTTAAGCTCGCCTCTGGCGATCTCCACCGTCAATCAATCTCAGTGTGCCCCCTTCGTTAAGGCTCGCTGCTAGTTGACAGCTTTTCGTTCTTTGGATAACAATCCAACGAAAAAAAAAATCAGATCTGA…	k__Fungi(100);p__unclassified_Fungi(100);c__unclassified_Fungi(100);o__unclassified_Fungi(100);f__unclassified_Fungi(100);g__unclassified_Fungi(100);s__Fungi_sp(100);
Otu0290	2	0	0	0	0	0	0	0	0	0	M03053_189_000000000-D2L8J_1_1101_23311_11587	ATAAGTAATGTGAATTGCAGAATTCAGTGAATCATCGAATCTTTGAACGCACATTGCGCCCGGCAGTATTCTGCCGGGCATGCCTGTTCGAGCGTCATTTCAACCCTCAAGCCCCCGGGCTTGGTGTTGGAGATCGGCCCGCCCCCGTGGCTGGCCGGCTCCGAAATCCAGTGGCGGTCCCGCTGTAGCTTCCGCTGCGTAGTAGCAATATCTCGCCCCGGAACGCGACGGAGCCCTGCCGTAAAACCCCCAACTTCTGAAGGTTGACCTCGGATCAGGTAGGAATACCCGCTGAACTTA	k__Fungi(100);p__Ascomycota(100);c__Sordariomycetes(100);o__Hypocreales(100);f__Nectriaceae(100);g__Xenoacremonium(100);s__Xenoacremonium_recifei(100);
Otu0291	0	0	0	0	0	0	0	0	0	2	M03053_189_000000000-D2L8J_1_1101_26045_10889	ATAAGTAATGTGAATTGCAGAATTCAGTGAATCATCGAATCTTTGAACGCACATTGCGCCCCTCGGTATTCCGGGGGGCATGCCTGTTCGAGCGTCATTACACCACTCAAGCTCGGCTTGGTGTTGGGCCCTCGTCCCCCCGCGGACGTGCCCGGAAATCAGTGGCGGCGCAGCCCGGCTTCAAGCGGTATCGCATATCTTCGCTTTGGAAGATCCGGGTCTGGGTCTGCCAGACAACCCCATCATCTCATCAAGGTTGACCTCGGATCAGGTAGGGATACCCGCTGAACTTA	k__Fungi(100);p__Ascomycota(100);c__Lecanoromycetes(100);o__Acarosporales(100);f__Acarosporaceae(100);g__Acarospora(100);s__Acarospora_austroshetlandica(100);
Otu0292	2	0	0	0	0	0	0	0	0	0	M03053_189_000000000-D2L8J_1_1101_18078_8284	ATAAGTAATGTGAATTGCAGAATTCAGTGAATCATCGAATCTTTGAACGCACATTGCGCCCGCCAGTATTCTGGCGGGCATGCCTGTCCGAGCGTCATTTCAACCCTCGAGCCCCTCCGGGGGGTCGGCGTTGGGGATCGGCCCCTCACCGGGCCGCCCCCGAAATCCAGTGGCGGTCTCGCCGCAGCCTCCCCTGCGCAGTAGTTTGCACACTCGCACCGGGAGCGCGGCGCGGCCACAGCCGTAAAACACCCCAAGCTCTGAAATGTTGACCTCGGATCAGGTAGGAATACCCGCTGAACTTA	k__Fungi(100);p__Ascomycota(100);c__Sordariomycetes(100);o__Hypocreales(100);f__Hypocreaceae(100);g__Trichoderma(100);unclassified(100);
Otu0293	0	2	0	0	0	0	0	0	0	0	M03053_189_000000000-D2L8J_1_1101_17986_15552	ATACGTAGTGTGAATTGCAGAATTCCGCGAATCATCGAGTCTTTGAACGCAAGTTGCGCCCGAGGCTTGTCCAAGGGCATCTCTGCCAGAGCGTCACCGCGACACCCACCGAACCACTCTACATAGTGGTTCGTGTGAAAGTGGCCATCCGAACGTGCACACACAAGTGCACGTTGGGTTGGCTGAAATGGAGGGAATTTGGCCGCCGTGTTGACACAGCCAGCGATCAGGTGATCCAGGTGTCAAAAGCCTGGAACTCAAACGTGCGCTGGCCCTCGTGGCATCCAGTTGGTCGGACTCACAAGCAGGATCCTACCGACACTTCGGCCTTAAAAAAGCCGGGTGGAGGAAGGGAGATAAAAAAGTCACGCATCAGACCTCTGATCAGAGAAGACTACC…	k__Fungi(100);unclassified(100);unclassified(100);unclassified(100);unclassified(100);unclassified(100);unclassified(100);
Otu0294	1	0	0	0	0	0	0	0	0	0	M03053_189_000000000-D2L8J_1_1102_13874_7308	ATACGTAATGTGAATTGCAGAATTCAGTGAATCATCGAATCTTTGAACGCATATTGCGCTCTCTGGTATTCCGGAGAGCATGCTTGTTTGAGTATCAGTAAACACCTCAACTCCCTTTCTTCTTGAAATGGAGCTGGACTTGAGTGATCCCAACGCTTTATTCATAAAGCGGCGGGTTACTTGAAATGCAGGTGCAGCTGGACTTTTCTCTGAGCTATAAGCATATCTATTTAGTCTGCCTCAAAACAGATTATTACCTTTGCTGCAGCTAACATAAAGGAGATTAGTTCTTGTGCTGACTGATGCAGGATTTCACAAGGGTCGGCAACGATTCTTGTAAAACTCGATCTCAAATCAAGTAAGACTACCCGCTGAACTTA	k__Fungi(100);p__Zygomycota(100);c__Mortierellomycotina_cls_Incertae_sedis(100);o__Mortierellales(100);f__Mortierellaceae(100);g__Mortierella(100);s__Mortierella_antarctica(100);
total	11663	12985	5587	3980	7525	6553	7340	6094	7962	8414
